# Supplementary material for: Balanced Cellular and Humoral Immune Responses Targeting Multiple Antigens in Adults Receiving a Quadrivalent Inactivated Influenza Vaccine
Source: Preprints.org preprint supplement (doi:10.20944/preprints202104.0072.v1), 2021-04-02
Supplement: Supplementary file 2 [file Preprint_Yu_Supplementary Tables S1-4.xlsx]

## Sheet: HA-NA
Supplementary Table S1. Composition of the Human Influenza A and B viruses homologs of HA/NA epitopes.
MP	Protein	start	End	Length	Sequence	A/H1N1	A/H3N2	B/IOWA	B/SING	ALL	A	B
HA/NA	HA	1	15	15	MKAIIVLLMVVTSNA	0	0	1	1			Shared
HA/NA	HA	6	20	15	VLLMVVTSNADRICT	0	0	1	1			Shared
HA/NA	HA	11	25	15	VTSNADRICTGITSS	0	0	1	1			Shared
HA/NA	HA	16	30	15	DRICTGITSSNSPHV	0	0	1	1			Shared
HA/NA	HA	21	35	15	GITSSNSPHVVKTAT	0	0	1	1			Shared
HA/NA	HA	26	40	15	NSPHVVKTATQGEVN	0	0	1	1			Shared
HA/NA	HA	31	45	15	VKTATQGEVNVTGVI	0	0	1	1			Shared
HA/NA	HA	36	50	15	QGEVNVTGVIPLTTT	0	0	1	1			Shared
HA/NA	HA	101	115	15	EVRPVTSGCFPIMHD	0	0	1	1			Shared
HA/NA	HA	106	120	15	TSGCFPIMHDRTKIR	0	0	1	1			Shared
HA/NA	HA	111	125	15	PIMHDRTKIRQLPNL	0	0	1	1			Shared
HA/NA	HA	116	130	15	RTKIRQLPNLLRGYE	0	0	1	1			Shared
HA/NA	NA	16	30	15	GGVLLSLYVSASLSY	0	0	1	1			Shared
HA/NA	NA	21	35	15	SLYVSASLSYLLYSD	0	0	1	1			Shared
HA/NA	NA	26	40	15	ASLSYLLYSDILLKF	0	0	1	1			Shared
HA/NA	NA	51	65	15	PLDCANASNVQAVNR	0	0	1	1			Shared
HA/NA	NA	56	70	15	NASNVQAVNRSATKG	0	0	1	1			Shared
HA/NA	NA	81	95	15	TYPRLSCPGSTFQKA	0	0	1	1			Shared
HA/NA	NA	86	100	15	SCPGSTFQKALLISP	0	0	1	1			Shared
HA/NA	NA	91	105	15	TFQKALLISPHRFGE	0	0	1	1			Shared
HA/NA	NA	96	110	15	LLISPHRFGETKGNS	0	0	1	1			Shared
HA/NA	NA	101	115	15	HRFGETKGNSAPLII	0	0	1	1			Shared
HA/NA	NA	126	140	15	ECKHFALTHYAAQPG	0	0	1	1			Shared
HA/NA	NA	131	145	15	ALTHYAAQPGGYYNG	0	0	1	1			Shared
HA/NA	NA	151	165	15	NKLRHLISVKLGKIP	0	0	1	1			Shared
HA/NA	NA	156	170	15	LISVKLGKIPTVENS	0	0	1	1			Shared
HA/NA	NA	161	175	15	LGKIPTVENSIFHMA	0	0	1	1			Shared
HA/NA	NA	166	180	15	TVENSIFHMAAWSGS	0	0	1	1			Shared
HA/NA	NA	171	185	15	IFHMAAWSGSACHDG	0	0	1	1			Shared
HA/NA	NA	251	265	15	CRFLKIREGRIIKEI	0	0	1	1			Shared
HA/NA	NA	256	270	15	IREGRIIKEIFPTGR	0	0	1	1			Shared
HA/NA	NA	261	275	15	IIKEIFPTGRVKHTE	0	0	1	1			Shared
HA/NA	NA	266	280	15	FPTGRVKHTEECTCG	0	0	1	1			Shared
HA/NA	NA	271	285	15	VKHTEECTCGFASNK	0	0	1	1			Shared
HA/NA	NA	276	290	15	ECTCGFASNKTIECA	0	0	1	1			Shared
HA/NA	NA	296	310	15	YTAKRPFVKLNVETD	0	0	1	1			Shared
HA/NA	NA	301	315	15	PFVKLNVETDTAEIR	0	0	1	1			Shared
HA/NA	NA	321	335	15	TYLDTPRPNDGSITG	0	0	1	1			Shared
HA/NA	NA	326	340	15	PRPNDGSITGPCESD	0	0	1	1			Shared
HA/NA	NA	406	420	15	PGWYSFGFEIKDKKC	0	0	1	1			Shared
HA/NA	NA	411	425	15	FGFEIKDKKCDVPCI	0	0	1	1			Shared
HA/NA	NA	416	430	15	KDKKCDVPCIGIEMV	0	0	1	1			Shared
HA/NA	NA	421	435	15	DVPCIGIEMVHDGGK	0	0	1	1			Shared
HA/NA	NA	441	455	15	AATAIYCLMGSGQLL	0	0	1	1			Shared
HA/NA	NA	446	460	15	YCLMGSGQLLWDTVT	0	0	1	1			Shared
HA/NA	HA	1	15	15	MKAILVVLLYTFTTA	1	0	0	0
HA/NA	HA	6	20	15	VVLLYTFTTANADTL	1	0	0	0
HA/NA	HA	11	25	15	TFTTANADTLCIGYH	1	0	0	0
HA/NA	HA	16	30	15	NADTLCIGYHANNST	1	0	0	0
HA/NA	HA	21	35	15	CIGYHANNSTDTVDT	1	0	0	0
HA/NA	HA	26	40	15	ANNSTDTVDTVLEKN	1	0	0	0
HA/NA	HA	31	45	15	DTVDTVLEKNVTVTH	1	0	0	0
HA/NA	HA	36	50	15	VLEKNVTVTHSVNLL	1	0	0	0
HA/NA	HA	41	55	15	VTVTHSVNLLEDKHN	1	0	0	0
HA/NA	HA	46	60	15	SVNLLEDKHNGKLCK	1	0	0	0
HA/NA	HA	51	65	15	EDKHNGKLCKLRGVA	1	0	0	0
HA/NA	HA	56	70	15	GKLCKLRGVAPLHLG	1	0	0	0
HA/NA	HA	61	75	15	LRGVAPLHLGKCNIA	1	0	0	0
HA/NA	HA	66	80	15	PLHLGKCNIAGWILG	1	0	0	0
HA/NA	HA	71	85	15	KCNIAGWILGNPECE	1	0	0	0
HA/NA	HA	76	90	15	GWILGNPECESLSTA	1	0	0	0
HA/NA	HA	81	95	15	NPECESLSTASSWSY	1	0	0	0
HA/NA	HA	86	100	15	SLSTASSWSYIVETS	1	0	0	0
HA/NA	HA	91	105	15	SSWSYIVETSNSDNG	1	0	0	0
HA/NA	HA	96	110	15	IVETSNSDNGTCYPG	1	0	0	0
HA/NA	HA	101	115	15	NSDNGTCYPGDFINY	1	0	0	0
HA/NA	HA	106	120	15	TCYPGDFINYEELRE	1	0	0	0
HA/NA	HA	111	125	15	DFINYEELREQLSSV	1	0	0	0
HA/NA	HA	116	130	15	EELREQLSSVSSFER	1	0	0	0
HA/NA	HA	121	135	15	QLSSVSSFERFEIFP	1	0	0	0
HA/NA	HA	126	140	15	SSFERFEIFPKASSW	1	0	0	0
HA/NA	HA	131	145	15	FEIFPKASSWPNHDS	1	0	0	0
HA/NA	HA	136	150	15	KASSWPNHDSNKGVT	1	0	0	0
HA/NA	HA	141	155	15	PNHDSNKGVTAACPH	1	0	0	0
HA/NA	HA	146	160	15	NKGVTAACPHAGAKS	1	0	0	0
HA/NA	HA	151	165	15	AACPHAGAKSFYKNL	1	0	0	0
HA/NA	HA	156	170	15	AGAKSFYKNLIWLVK	1	0	0	0
HA/NA	HA	161	175	15	FYKNLIWLVKKGNSY	1	0	0	0
HA/NA	HA	166	180	15	IWLVKKGNSYPKLNQ	1	0	0	0
HA/NA	HA	171	185	15	KGNSYPKLNQSYIND	1	0	0	0
HA/NA	HA	176	190	15	PKLNQSYINDKGKEV	1	0	0	0
HA/NA	HA	181	195	15	SYINDKGKEVLVLWG	1	0	0	0
HA/NA	HA	186	200	15	KGKEVLVLWGIHHPS	1	0	0	0
HA/NA	HA	191	205	15	LVLWGIHHPSTTADQ	1	0	0	0
HA/NA	HA	196	210	15	IHHPSTTADQQSLYQ	1	0	0	0
HA/NA	HA	201	215	15	TTADQQSLYQNADAY	1	0	0	0
HA/NA	HA	206	220	15	QSLYQNADAYVFVGT	1	0	0	0
HA/NA	HA	211	225	15	NADAYVFVGTSRYSK	1	0	0	0
HA/NA	HA	216	230	15	VFVGTSRYSKKFKPE	1	0	0	0
HA/NA	HA	221	235	15	SRYSKKFKPEIATRP	1	0	0	0
HA/NA	HA	226	240	15	KFKPEIATRPKVRDQ	1	0	0	0
HA/NA	HA	231	245	15	IATRPKVRDQEARMN	1	0	0	0
HA/NA	HA	236	250	15	KVRDQEARMNYYWTL	1	0	0	0
HA/NA	HA	241	255	15	EARMNYYWTLVEPGD	1	0	0	0
HA/NA	HA	246	260	15	YYWTLVEPGDKITFE	1	0	0	0
HA/NA	HA	251	265	15	VEPGDKITFEATGNL	1	0	0	0
HA/NA	HA	256	270	15	KITFEATGNLVVPRY	1	0	0	0
HA/NA	HA	261	275	15	ATGNLVVPRYAFTME	1	0	0	0
HA/NA	HA	266	280	15	VVPRYAFTMERNAGS	1	0	0	0
HA/NA	HA	271	285	15	AFTMERNAGSGIIIS	1	0	0	0
HA/NA	HA	276	290	15	RNAGSGIIISDTPVH	1	0	0	0
HA/NA	HA	281	295	15	GIIISDTPVHDCNTT	1	0	0	0
HA/NA	HA	286	300	15	DTPVHDCNTTCQTPE	1	0	0	0
HA/NA	HA	291	305	15	DCNTTCQTPEGAINT	1	0	0	0
HA/NA	HA	296	310	15	CQTPEGAINTSLPFQ	1	0	0	0
HA/NA	HA	301	315	15	GAINTSLPFQNIHPI	1	0	0	0
HA/NA	HA	306	320	15	SLPFQNIHPITIGKC	1	0	0	0
HA/NA	HA	311	325	15	NIHPITIGKCPKYVK	1	0	0	0
HA/NA	HA	316	330	15	TIGKCPKYVKSTKLR	1	0	0	0
HA/NA	HA	321	335	15	PKYVKSTKLRLATGL	1	0	0	0
HA/NA	HA	326	340	15	STKLRLATGLRNVPS	1	0	0	0
HA/NA	HA	331	345	15	LATGLRNVPSIQSRG	1	0	0	0
HA/NA	HA	336	350	15	RNVPSIQSRGLFGAI	1	0	0	0
HA/NA	HA	341	355	15	IQSRGLFGAIAGFIE	1	0	0	0
HA/NA	HA	346	360	15	LFGAIAGFIEGGWTG	1	0	0	0
HA/NA	HA	351	365	15	AGFIEGGWTGMVDGW	1	0	0	0
HA/NA	HA	356	370	15	GGWTGMVDGWYGYHH	1	0	0	0
HA/NA	HA	361	375	15	MVDGWYGYHHQNEQG	1	0	0	0
HA/NA	HA	366	380	15	YGYHHQNEQGSGYAA	1	0	0	0
HA/NA	HA	371	385	15	QNEQGSGYAADLKST	1	0	0	0
HA/NA	HA	376	390	15	SGYAADLKSTQNAID	1	0	0	0
HA/NA	HA	381	395	15	DLKSTQNAIDKITNK	1	0	0	0
HA/NA	HA	386	400	15	QNAIDKITNKVNSVI	1	0	0	0
HA/NA	HA	391	405	15	KITNKVNSVIEKMNT	1	0	0	0
HA/NA	HA	396	410	15	VNSVIEKMNTQFTAV	1	0	0	0
HA/NA	HA	401	415	15	EKMNTQFTAVGKEFN	1	0	0	0
HA/NA	HA	406	420	15	QFTAVGKEFNHLEKR	1	0	0	0
HA/NA	HA	411	425	15	GKEFNHLEKRIENLN	1	0	0	0
HA/NA	HA	416	430	15	HLEKRIENLNKKVDD	1	0	0	0
HA/NA	HA	421	435	15	IENLNKKVDDGFLDI	1	0	0	0
HA/NA	HA	426	440	15	KKVDDGFLDIWTYNA	1	0	0	0
HA/NA	HA	431	445	15	GFLDIWTYNAELLVL	1	0	0	0
HA/NA	HA	436	450	15	WTYNAELLVLLENER	1	0	0	0
HA/NA	HA	441	455	15	ELLVLLENERTLDYH	1	0	0	0
HA/NA	HA	446	460	15	LENERTLDYHDSNVK	1	0	0	0
HA/NA	HA	451	465	15	TLDYHDSNVKNLYEK	1	0	0	0
HA/NA	HA	456	470	15	DSNVKNLYEKVRNQL	1	0	0	0
HA/NA	HA	461	475	15	NLYEKVRNQLKNNAK	1	0	0	0
HA/NA	HA	466	480	15	VRNQLKNNAKEIGNG	1	0	0	0
HA/NA	HA	471	485	15	KNNAKEIGNGCFEFY	1	0	0	0
HA/NA	HA	476	490	15	EIGNGCFEFYHKCDN	1	0	0	0
HA/NA	HA	481	495	15	CFEFYHKCDNTCMES	1	0	0	0
HA/NA	HA	486	500	15	HKCDNTCMESVKNGT	1	0	0	0
HA/NA	HA	491	505	15	TCMESVKNGTYDYPK	1	0	0	0
HA/NA	HA	496	510	15	VKNGTYDYPKYSEEA	1	0	0	0
HA/NA	HA	501	515	15	YDYPKYSEEAKLNRE	1	0	0	0
HA/NA	HA	506	520	15	YSEEAKLNREKIDGV	1	0	0	0
HA/NA	HA	511	525	15	KLNREKIDGVKLEST	1	0	0	0
HA/NA	HA	516	530	15	KIDGVKLESTRIYQI	1	0	0	0
HA/NA	HA	521	535	15	KLESTRIYQILAIYS	1	0	0	0
HA/NA	HA	526	540	15	RIYQILAIYSTVASS	1	0	0	0
HA/NA	HA	531	545	15	LAIYSTVASSLVLVV	1	0	0	0
HA/NA	HA	536	550	15	TVASSLVLVVSLGAI	1	0	0	0
HA/NA	HA	541	555	15	LVLVVSLGAISFWMC	1	0	0	0
HA/NA	HA	546	560	15	SLGAISFWMCSNGSL	1	0	0	0
HA/NA	HA	551	565	15	SFWMCSNGSLQCRIC	1	0	0	0
HA/NA	HA	556	566	11	SNGSLQCRICI	1	0	0	0
HA/NA	NA	1	15	15	MNPNQKIITIGSISM	1	0	0	0
HA/NA	NA	6	20	15	KIITIGSISMTIGMA	1	0	0	0
HA/NA	NA	11	25	15	GSISMTIGMANLILQ	1	0	0	0
HA/NA	NA	16	30	15	TIGMANLILQIGNII	1	0	0	0
HA/NA	NA	21	35	15	NLILQIGNIISIWVS	1	0	0	0
HA/NA	NA	26	40	15	IGNIISIWVSHSIQI	1	0	0	0
HA/NA	NA	31	45	15	SIWVSHSIQIGNQSQ	1	0	0	0
HA/NA	NA	36	50	15	HSIQIGNQSQIETCN	1	0	0	0
HA/NA	NA	41	55	15	GNQSQIETCNQSVIT	1	0	0	0
HA/NA	NA	46	60	15	IETCNQSVITYENNT	1	0	0	0
HA/NA	NA	51	65	15	QSVITYENNTWVNQT	1	0	0	0
HA/NA	NA	56	70	15	YENNTWVNQTYVNIS	1	0	0	0
HA/NA	NA	61	75	15	WVNQTYVNISNTNFA	1	0	0	0
HA/NA	NA	66	80	15	YVNISNTNFAAGQSV	1	0	0	0
HA/NA	NA	71	85	15	NTNFAAGQSVVSVKL	1	0	0	0
HA/NA	NA	76	90	15	AGQSVVSVKLAGNSS	1	0	0	0
HA/NA	NA	81	95	15	VSVKLAGNSSLCPVS	1	0	0	0
HA/NA	NA	86	100	15	AGNSSLCPVSGWAIY	1	0	0	0
HA/NA	NA	91	105	15	LCPVSGWAIYSKDNS	1	0	0	0
HA/NA	NA	96	110	15	GWAIYSKDNSVRIGS	1	0	0	0
HA/NA	NA	101	115	15	SKDNSVRIGSKGDVF	1	0	0	0
HA/NA	NA	106	120	15	VRIGSKGDVFVIREP	1	0	0	0
HA/NA	NA	111	125	15	KGDVFVIREPFISCS	1	0	0	0
HA/NA	NA	116	130	15	VIREPFISCSPLECR	1	0	0	0
HA/NA	NA	121	135	15	FISCSPLECRTFFLT	1	0	0	0
HA/NA	NA	126	140	15	PLECRTFFLTQGALL	1	0	0	0
HA/NA	NA	131	145	15	TFFLTQGALLNDKHS	1	0	0	0
HA/NA	NA	136	150	15	QGALLNDKHSNGTIK	1	0	0	0
HA/NA	NA	141	155	15	NDKHSNGTIKDRSPY	1	0	0	0
HA/NA	NA	146	160	15	NGTIKDRSPYRTLMS	1	0	0	0
HA/NA	NA	151	165	15	DRSPYRTLMSCPIGE	1	0	0	0
HA/NA	NA	156	170	15	RTLMSCPIGEVPSPY	1	0	0	0
HA/NA	NA	161	175	15	CPIGEVPSPYNSRFE	1	0	0	0
HA/NA	NA	166	180	15	VPSPYNSRFESVAWS	1	0	0	0
HA/NA	NA	171	185	15	NSRFESVAWSASACH	1	0	0	0
HA/NA	NA	176	190	15	SVAWSASACHDGINW	1	0	0	0
HA/NA	NA	181	195	15	ASACHDGINWLTIGI	1	0	0	0
HA/NA	NA	186	200	15	DGINWLTIGISGPDS	1	0	0	0
HA/NA	NA	191	205	15	LTIGISGPDSGAVAV	1	0	0	0
HA/NA	NA	196	210	15	SGPDSGAVAVLKYNG	1	0	0	0
HA/NA	NA	201	215	15	GAVAVLKYNGIITDT	1	0	0	0
HA/NA	NA	206	220	15	LKYNGIITDTIKSWR	1	0	0	0
HA/NA	NA	211	225	15	IITDTIKSWRNNILR	1	0	0	0
HA/NA	NA	216	230	15	IKSWRNNILRTQESE	1	0	0	0
HA/NA	NA	221	235	15	NNILRTQESECACVN	1	0	0	0
HA/NA	NA	226	240	15	TQESECACVNGSCFT	1	0	0	0
HA/NA	NA	231	245	15	CACVNGSCFTIMTDG	1	0	0	0
HA/NA	NA	236	250	15	GSCFTIMTDGPSDGQ	1	0	0	0
HA/NA	NA	241	255	15	IMTDGPSDGQASYKI	1	0	0	0
HA/NA	NA	246	260	15	PSDGQASYKIFRIEK	1	0	0	0
HA/NA	NA	251	265	15	ASYKIFRIEKGKIIK	1	0	0	0
HA/NA	NA	256	270	15	FRIEKGKIIKSVEMK	1	0	0	0
HA/NA	NA	261	275	15	GKIIKSVEMKAPNYH	1	0	0	0
HA/NA	NA	266	280	15	SVEMKAPNYHYEECS	1	0	0	0
HA/NA	NA	271	285	15	APNYHYEECSCYPDS	1	0	0	0
HA/NA	NA	276	290	15	YEECSCYPDSSEITC	1	0	0	0
HA/NA	NA	281	295	15	CYPDSSEITCVCRDN	1	0	0	0
HA/NA	NA	286	300	15	SEITCVCRDNWHGSN	1	0	0	0
HA/NA	NA	291	305	15	VCRDNWHGSNRPWVS	1	0	0	0
HA/NA	NA	296	310	15	WHGSNRPWVSFNQNL	1	0	0	0
HA/NA	NA	301	315	15	RPWVSFNQNLEYQMG	1	0	0	0
HA/NA	NA	306	320	15	FNQNLEYQMGYICSG	1	0	0	0
HA/NA	NA	311	325	15	EYQMGYICSGVFGDN	1	0	0	0
HA/NA	NA	316	330	15	YICSGVFGDNPRPND	1	0	0	0
HA/NA	NA	321	335	15	VFGDNPRPNDKTGSC	1	0	0	0
HA/NA	NA	326	340	15	PRPNDKTGSCGPVSS	1	0	0	0
HA/NA	NA	331	345	15	KTGSCGPVSSNGANG	1	0	0	0
HA/NA	NA	336	350	15	GPVSSNGANGVKGFS	1	0	0	0
HA/NA	NA	341	355	15	NGANGVKGFSFKYGN	1	0	0	0
HA/NA	NA	346	360	15	VKGFSFKYGNGVWIG	1	0	0	0
HA/NA	NA	351	365	15	FKYGNGVWIGRTKSI	1	0	0	0
HA/NA	NA	356	370	15	GVWIGRTKSISSRKG	1	0	0	0
HA/NA	NA	361	375	15	RTKSISSRKGFEMIW	1	0	0	0
HA/NA	NA	366	380	15	SSRKGFEMIWDPNGW	1	0	0	0
HA/NA	NA	371	385	15	FEMIWDPNGWTGTDN	1	0	0	0
HA/NA	NA	376	390	15	DPNGWTGTDNKFSIK	1	0	0	0
HA/NA	NA	381	395	15	TGTDNKFSIKQDIVG	1	0	0	0
HA/NA	NA	386	400	15	KFSIKQDIVGINEWS	1	0	0	0
HA/NA	NA	391	405	15	QDIVGINEWSGYSGS	1	0	0	0
HA/NA	NA	396	410	15	INEWSGYSGSFVQHP	1	0	0	0
HA/NA	NA	401	415	15	GYSGSFVQHPELTGL	1	0	0	0
HA/NA	NA	406	420	15	FVQHPELTGLDCIRP	1	0	0	0
HA/NA	NA	411	425	15	ELTGLDCIRPCFWVE	1	0	0	0
HA/NA	NA	416	430	15	DCIRPCFWVELIRGR	1	0	0	0
HA/NA	NA	421	435	15	CFWVELIRGRPEENT	1	0	0	0
HA/NA	NA	426	440	15	LIRGRPEENTIWTSG	1	0	0	0
HA/NA	NA	431	445	15	PEENTIWTSGSSISF	1	0	0	0
HA/NA	NA	436	450	15	IWTSGSSISFCGVNS	1	0	0	0
HA/NA	NA	441	455	15	SSISFCGVNSDTVGW	1	0	0	0
HA/NA	NA	446	460	15	CGVNSDTVGWSWPDG	1	0	0	0
HA/NA	NA	451	465	15	DTVGWSWPDGAELPF	1	0	0	0
HA/NA	NA	456	469	14	SWPDGAELPFTIDK	1	0	0	0
HA/NA	HA	1	15	15	MKTIIALSYILCLVF	0	1	0	0
HA/NA	HA	6	20	15	ALSYILCLVFAQKIP	0	1	0	0
HA/NA	HA	11	25	15	LCLVFAQKIPGNDNS	0	1	0	0
HA/NA	HA	16	30	15	AQKIPGNDNSTATLC	0	1	0	0
HA/NA	HA	21	35	15	GNDNSTATLCLGHHA	0	1	0	0
HA/NA	HA	26	40	15	TATLCLGHHAVPNGT	0	1	0	0
HA/NA	HA	31	45	15	LGHHAVPNGTIVKTI	0	1	0	0
HA/NA	HA	36	50	15	VPNGTIVKTITNDRI	0	1	0	0
HA/NA	HA	41	55	15	IVKTITNDRIEVTNA	0	1	0	0
HA/NA	HA	46	60	15	TNDRIEVTNATELVQ	0	1	0	0
HA/NA	HA	51	65	15	EVTNATELVQNSSIG	0	1	0	0
HA/NA	HA	56	70	15	TELVQNSSIGEICDS	0	1	0	0
HA/NA	HA	61	75	15	NSSIGEICDSPHQIL	0	1	0	0
HA/NA	HA	66	80	15	EICDSPHQILDGENC	0	1	0	0
HA/NA	HA	71	85	15	PHQILDGENCTLIDA	0	1	0	0
HA/NA	HA	76	90	15	DGENCTLIDALLGDP	0	1	0	0
HA/NA	HA	81	95	15	TLIDALLGDPQCDGF	0	1	0	0
HA/NA	HA	86	100	15	LLGDPQCDGFQNKKW	0	1	0	0
HA/NA	HA	91	105	15	QCDGFQNKKWDLFVE	0	1	0	0
HA/NA	HA	96	110	15	QNKKWDLFVERSKAY	0	1	0	0
HA/NA	HA	101	115	15	DLFVERSKAYSNCYP	0	1	0	0
HA/NA	HA	106	120	15	RSKAYSNCYPYDVPD	0	1	0	0
HA/NA	HA	111	125	15	SNCYPYDVPDYASLR	0	1	0	0
HA/NA	HA	116	130	15	YDVPDYASLRSLVAS	0	1	0	0
HA/NA	HA	121	135	15	YASLRSLVASSGTLE	0	1	0	0
HA/NA	HA	126	140	15	SLVASSGTLEFNNES	0	1	0	0
HA/NA	HA	131	145	15	SGTLEFNNESFNWTG	0	1	0	0
HA/NA	HA	136	150	15	FNNESFNWTGVTQNG	0	1	0	0
HA/NA	HA	141	155	15	FNWTGVTQNGTSSAC	0	1	0	0
HA/NA	HA	146	160	15	VTQNGTSSACIRRSS	0	1	0	0
HA/NA	HA	151	165	15	TSSACIRRSSSSFFS	0	1	0	0
HA/NA	HA	156	170	15	IRRSSSSFFSRLNWL	0	1	0	0
HA/NA	HA	161	175	15	SSFFSRLNWLTHLNY	0	1	0	0
HA/NA	HA	166	180	15	RLNWLTHLNYTYPAL	0	1	0	0
HA/NA	HA	171	185	15	THLNYTYPALNVTMP	0	1	0	0
HA/NA	HA	176	190	15	TYPALNVTMPNKEQF	0	1	0	0
HA/NA	HA	181	195	15	NVTMPNKEQFDKLYI	0	1	0	0
HA/NA	HA	186	200	15	NKEQFDKLYIWGVHH	0	1	0	0
HA/NA	HA	191	205	15	DKLYIWGVHHPGTDK	0	1	0	0
HA/NA	HA	196	210	15	WGVHHPGTDKDQIFL	0	1	0	0
HA/NA	HA	201	215	15	PGTDKDQIFLYAQSS	0	1	0	0
HA/NA	HA	206	220	15	DQIFLYAQSSGRITV	0	1	0	0
HA/NA	HA	211	225	15	YAQSSGRITVSTKRS	0	1	0	0
HA/NA	HA	216	230	15	GRITVSTKRSQQAVI	0	1	0	0
HA/NA	HA	221	235	15	STKRSQQAVIPNIGS	0	1	0	0
HA/NA	HA	226	240	15	QQAVIPNIGSRPRIR	0	1	0	0
HA/NA	HA	231	245	15	PNIGSRPRIRDIPSR	0	1	0	0
HA/NA	HA	236	250	15	RPRIRDIPSRISIYW	0	1	0	0
HA/NA	HA	241	255	15	DIPSRISIYWTIVKP	0	1	0	0
HA/NA	HA	246	260	15	ISIYWTIVKPGDILL	0	1	0	0
HA/NA	HA	251	265	15	TIVKPGDILLINSTG	0	1	0	0
HA/NA	HA	256	270	15	GDILLINSTGNLIAP	0	1	0	0
HA/NA	HA	261	275	15	INSTGNLIAPRGYFK	0	1	0	0
HA/NA	HA	266	280	15	NLIAPRGYFKIRSGK	0	1	0	0
HA/NA	HA	271	285	15	RGYFKIRSGKSSIMR	0	1	0	0
HA/NA	HA	276	290	15	IRSGKSSIMRSDAPI	0	1	0	0
HA/NA	HA	281	295	15	SSIMRSDAPIGKCKS	0	1	0	0
HA/NA	HA	286	300	15	SDAPIGKCKSECITP	0	1	0	0
HA/NA	HA	291	305	15	GKCKSECITPNGSIP	0	1	0	0
HA/NA	HA	296	310	15	ECITPNGSIPNDKPF	0	1	0	0
HA/NA	HA	301	315	15	NGSIPNDKPFQNVNR	0	1	0	0
HA/NA	HA	306	320	15	NDKPFQNVNRITYGA	0	1	0	0
HA/NA	HA	311	325	15	QNVNRITYGACPRYV	0	1	0	0
HA/NA	HA	316	330	15	ITYGACPRYVKHSTL	0	1	0	0
HA/NA	HA	321	335	15	CPRYVKHSTLKLATG	0	1	0	0
HA/NA	HA	326	340	15	KHSTLKLATGMRNVP	0	1	0	0
HA/NA	HA	331	345	15	KLATGMRNVPEKQTR	0	1	0	0
HA/NA	HA	336	350	15	MRNVPEKQTRGIFGA	0	1	0	0
HA/NA	HA	341	355	15	EKQTRGIFGAIAGFI	0	1	0	0
HA/NA	HA	346	360	15	GIFGAIAGFIENGWE	0	1	0	0
HA/NA	HA	351	365	15	IAGFIENGWEGMVDG	0	1	0	0
HA/NA	HA	356	370	15	ENGWEGMVDGWYGFR	0	1	0	0
HA/NA	HA	361	375	15	GMVDGWYGFRHQNSE	0	1	0	0
HA/NA	HA	366	380	15	WYGFRHQNSEGRGQA	0	1	0	0
HA/NA	HA	371	385	15	HQNSEGRGQAADLKS	0	1	0	0
HA/NA	HA	376	390	15	GRGQAADLKSTQAAI	0	1	0	0
HA/NA	HA	381	395	15	ADLKSTQAAIDQING	0	1	0	0
HA/NA	HA	386	400	15	TQAAIDQINGKLNRL	0	1	0	0
HA/NA	HA	391	405	15	DQINGKLNRLIGKTN	0	1	0	0
HA/NA	HA	396	410	15	KLNRLIGKTNEKFHQ	0	1	0	0
HA/NA	HA	401	415	15	IGKTNEKFHQIEKEF	0	1	0	0
HA/NA	HA	406	420	15	EKFHQIEKEFSEVEG	0	1	0	0
HA/NA	HA	411	425	15	IEKEFSEVEGRVQDL	0	1	0	0
HA/NA	HA	416	430	15	SEVEGRVQDLEKYVE	0	1	0	0
HA/NA	HA	421	435	15	RVQDLEKYVEDTKID	0	1	0	0
HA/NA	HA	426	440	15	EKYVEDTKIDLWSYN	0	1	0	0
HA/NA	HA	431	445	15	DTKIDLWSYNAELLV	0	1	0	0
HA/NA	HA	436	450	15	LWSYNAELLVALENQ	0	1	0	0
HA/NA	HA	441	455	15	AELLVALENQHTIDL	0	1	0	0
HA/NA	HA	446	460	15	ALENQHTIDLTDSEM	0	1	0	0
HA/NA	HA	451	465	15	HTIDLTDSEMNKLFE	0	1	0	0
HA/NA	HA	456	470	15	TDSEMNKLFEKTKKQ	0	1	0	0
HA/NA	HA	461	475	15	NKLFEKTKKQLRENA	0	1	0	0
HA/NA	HA	466	480	15	KTKKQLRENAEDMGN	0	1	0	0
HA/NA	HA	471	485	15	LRENAEDMGNGCFKI	0	1	0	0
HA/NA	HA	476	490	15	EDMGNGCFKIYHKCD	0	1	0	0
HA/NA	HA	481	495	15	GCFKIYHKCDNACIG	0	1	0	0
HA/NA	HA	486	500	15	YHKCDNACIGSIRNE	0	1	0	0
HA/NA	HA	491	505	15	NACIGSIRNETYDHN	0	1	0	0
HA/NA	HA	496	510	15	SIRNETYDHNVYRDE	0	1	0	0
HA/NA	HA	501	515	15	TYDHNVYRDEALNNR	0	1	0	0
HA/NA	HA	506	520	15	VYRDEALNNRFQIKG	0	1	0	0
HA/NA	HA	511	525	15	ALNNRFQIKGVELKS	0	1	0	0
HA/NA	HA	516	530	15	FQIKGVELKSGYKDW	0	1	0	0
HA/NA	HA	521	535	15	VELKSGYKDWILWIS	0	1	0	0
HA/NA	HA	526	540	15	GYKDWILWISFAISC	0	1	0	0
HA/NA	HA	531	545	15	ILWISFAISCFLLCV	0	1	0	0
HA/NA	HA	536	550	15	FAISCFLLCVALLGF	0	1	0	0
HA/NA	HA	541	555	15	FLLCVALLGFIMWAC	0	1	0	0
HA/NA	HA	546	560	15	ALLGFIMWACQKGNI	0	1	0	0
HA/NA	HA	551	565	15	IMWACQKGNIRCNIC	0	1	0	0
HA/NA	HA	556	566	11	QKGNIRCNICI	0	1	0	0
HA/NA	NA	1	15	15	MNPNQKIITIGSVSL	0	1	0	0
HA/NA	NA	6	20	15	KIITIGSVSLTISTI	0	1	0	0
HA/NA	NA	11	25	15	GSVSLTISTICFFMQ	0	1	0	0
HA/NA	NA	16	30	15	TISTICFFMQIAILI	0	1	0	0
HA/NA	NA	21	35	15	CFFMQIAILITTVTL	0	1	0	0
HA/NA	NA	26	40	15	IAILITTVTLHFKQY	0	1	0	0
HA/NA	NA	31	45	15	TTVTLHFKQYEFNSP	0	1	0	0
HA/NA	NA	36	50	15	HFKQYEFNSPPNNQV	0	1	0	0
HA/NA	NA	41	55	15	EFNSPPNNQVMLCEP	0	1	0	0
HA/NA	NA	46	60	15	PNNQVMLCEPTIIER	0	1	0	0
HA/NA	NA	51	65	15	MLCEPTIIERNITEI	0	1	0	0
HA/NA	NA	56	70	15	TIIERNITEIVYLTN	0	1	0	0
HA/NA	NA	61	75	15	NITEIVYLTNTTIEK	0	1	0	0
HA/NA	NA	66	80	15	VYLTNTTIEKEICPK	0	1	0	0
HA/NA	NA	71	85	15	TTIEKEICPKPAEYR	0	1	0	0
HA/NA	NA	76	90	15	EICPKPAEYRNWSKP	0	1	0	0
HA/NA	NA	81	95	15	PAEYRNWSKPQCGIT	0	1	0	0
HA/NA	NA	86	100	15	NWSKPQCGITGFAPF	0	1	0	0
HA/NA	NA	91	105	15	QCGITGFAPFSKDNS	0	1	0	0
HA/NA	NA	96	110	15	GFAPFSKDNSIRLSA	0	1	0	0
HA/NA	NA	101	115	15	SKDNSIRLSAGGDIW	0	1	0	0
HA/NA	NA	106	120	15	IRLSAGGDIWVTREP	0	1	0	0
HA/NA	NA	111	125	15	GGDIWVTREPYVSCD	0	1	0	0
HA/NA	NA	116	130	15	VTREPYVSCDPDKCY	0	1	0	0
HA/NA	NA	121	135	15	YVSCDPDKCYQFALG	0	1	0	0
HA/NA	NA	126	140	15	PDKCYQFALGQGTTL	0	1	0	0
HA/NA	NA	131	145	15	QFALGQGTTLNNVHS	0	1	0	0
HA/NA	NA	136	150	15	QGTTLNNVHSNNTVR	0	1	0	0
HA/NA	NA	141	155	15	NNVHSNNTVRDRTPY	0	1	0	0
HA/NA	NA	146	160	15	NNTVRDRTPYRTLLM	0	1	0	0
HA/NA	NA	151	165	15	DRTPYRTLLMNELGV	0	1	0	0
HA/NA	NA	156	170	15	RTLLMNELGVPFHLG	0	1	0	0
HA/NA	NA	161	175	15	NELGVPFHLGTKQVC	0	1	0	0
HA/NA	NA	166	180	15	PFHLGTKQVCIAWSS	0	1	0	0
HA/NA	NA	171	185	15	TKQVCIAWSSSSCHD	0	1	0	0
HA/NA	NA	176	190	15	IAWSSSSCHDGKAWL	0	1	0	0
HA/NA	NA	181	195	15	SSCHDGKAWLHVCIT	0	1	0	0
HA/NA	NA	186	200	15	GKAWLHVCITGDDKN	0	1	0	0
HA/NA	NA	191	205	15	HVCITGDDKNATASF	0	1	0	0
HA/NA	NA	196	210	15	GDDKNATASFIYNGR	0	1	0	0
HA/NA	NA	201	215	15	ATASFIYNGRLVDSV	0	1	0	0
HA/NA	NA	206	220	15	IYNGRLVDSVVSWSK	0	1	0	0
HA/NA	NA	211	225	15	LVDSVVSWSKDILRT	0	1	0	0
HA/NA	NA	216	230	15	VSWSKDILRTQESEC	0	1	0	0
HA/NA	NA	221	235	15	DILRTQESECVCING	0	1	0	0
HA/NA	NA	226	240	15	QESECVCINGTCTVV	0	1	0	0
HA/NA	NA	231	245	15	VCINGTCTVVMTDGN	0	1	0	0
HA/NA	NA	236	250	15	TCTVVMTDGNATGKA	0	1	0	0
HA/NA	NA	241	255	15	MTDGNATGKADTKIL	0	1	0	0
HA/NA	NA	246	260	15	ATGKADTKILFIEEG	0	1	0	0
HA/NA	NA	251	265	15	DTKILFIEEGKIVHT	0	1	0	0
HA/NA	NA	256	270	15	FIEEGKIVHTSKLSG	0	1	0	0
HA/NA	NA	261	275	15	KIVHTSKLSGSAQHV	0	1	0	0
HA/NA	NA	266	280	15	SKLSGSAQHVEECSC	0	1	0	0
HA/NA	NA	271	285	15	SAQHVEECSCYPRYP	0	1	0	0
HA/NA	NA	276	290	15	EECSCYPRYPGVRCV	0	1	0	0
HA/NA	NA	281	295	15	YPRYPGVRCVCRDNW	0	1	0	0
HA/NA	NA	286	300	15	GVRCVCRDNWKGSNR	0	1	0	0
HA/NA	NA	291	305	15	CRDNWKGSNRPIVDI	0	1	0	0
HA/NA	NA	296	310	15	KGSNRPIVDINIKDH	0	1	0	0
HA/NA	NA	301	315	15	PIVDINIKDHSIVSS	0	1	0	0
HA/NA	NA	306	320	15	NIKDHSIVSSYVCSG	0	1	0	0
HA/NA	NA	311	325	15	SIVSSYVCSGLVGDT	0	1	0	0
HA/NA	NA	316	330	15	YVCSGLVGDTPRKND	0	1	0	0
HA/NA	NA	321	335	15	LVGDTPRKNDSSSSS	0	1	0	0
HA/NA	NA	326	340	15	PRKNDSSSSSHCLNP	0	1	0	0
HA/NA	NA	331	345	15	SSSSSHCLNPNNEEG	0	1	0	0
HA/NA	NA	336	350	15	HCLNPNNEEGGHGVK	0	1	0	0
HA/NA	NA	341	355	15	NNEEGGHGVKGWAFD	0	1	0	0
HA/NA	NA	346	360	15	GHGVKGWAFDDGNDV	0	1	0	0
HA/NA	NA	351	365	15	GWAFDDGNDVWMGRT	0	1	0	0
HA/NA	NA	356	370	15	DGNDVWMGRTINETS	0	1	0	0
HA/NA	NA	361	375	15	WMGRTINETSRLGYE	0	1	0	0
HA/NA	NA	366	380	15	INETSRLGYETFKVV	0	1	0	0
HA/NA	NA	371	385	15	RLGYETFKVVEGWSN	0	1	0	0
HA/NA	NA	376	390	15	TFKVVEGWSNPKSKL	0	1	0	0
HA/NA	NA	381	395	15	EGWSNPKSKLQINRQ	0	1	0	0
HA/NA	NA	386	400	15	PKSKLQINRQVIVDR	0	1	0	0
HA/NA	NA	391	405	15	QINRQVIVDRGDRSG	0	1	0	0
HA/NA	NA	396	410	15	VIVDRGDRSGYSGIF	0	1	0	0
HA/NA	NA	401	415	15	GDRSGYSGIFSVEGK	0	1	0	0
HA/NA	NA	406	420	15	YSGIFSVEGKSCINR	0	1	0	0
HA/NA	NA	411	425	15	SVEGKSCINRCFYVE	0	1	0	0
HA/NA	NA	416	430	15	SCINRCFYVELIRGR	0	1	0	0
HA/NA	NA	421	435	15	CFYVELIRGRKEETE	0	1	0	0
HA/NA	NA	426	440	15	LIRGRKEETEVLWTS	0	1	0	0
HA/NA	NA	431	445	15	KEETEVLWTSNSIVV	0	1	0	0
HA/NA	NA	436	450	15	VLWTSNSIVVFCGTS	0	1	0	0
HA/NA	NA	441	455	15	NSIVVFCGTSGTYGT	0	1	0	0
HA/NA	NA	446	460	15	FCGTSGTYGTGSWPD	0	1	0	0
HA/NA	NA	451	465	15	GTYGTGSWPDGADLN	0	1	0	0
HA/NA	NA	456	469	14	GSWPDGADLNLMHI	0	1	0	0
HA/NA	HA	41	55	15	VTGVIPLTTTPTKSH	0	0	1	0
HA/NA	HA	46	60	15	PLTTTPTKSHFANLK	0	0	1	0
HA/NA	HA	51	65	15	PTKSHFANLKGTETR	0	0	1	0
HA/NA	HA	56	70	15	FANLKGTETRGKLCP	0	0	1	0
HA/NA	HA	61	75	15	GTETRGKLCPKCLNC	0	0	1	0
HA/NA	HA	66	80	15	GKLCPKCLNCTDLDV	0	0	1	0
HA/NA	HA	71	85	15	KCLNCTDLDVALGRP	0	0	1	0
HA/NA	HA	76	90	15	TDLDVALGRPKCTGK	0	0	1	0
HA/NA	HA	81	95	15	ALGRPKCTGKIPSAR	0	0	1	0
HA/NA	HA	86	100	15	KCTGKIPSARVSILH	0	0	1	0
HA/NA	HA	91	105	15	IPSARVSILHEVRPV	0	0	1	0
HA/NA	HA	96	110	15	VSILHEVRPVTSGCF	0	0	1	0
HA/NA	HA	121	135	15	QLPNLLRGYEHVRLS	0	0	1	0
HA/NA	HA	126	140	15	LRGYEHVRLSTHNVI	0	0	1	0
HA/NA	HA	131	145	15	HVRLSTHNVINAEGA	0	0	1	0
HA/NA	HA	136	150	15	THNVINAEGAPGGPY	0	0	1	0
HA/NA	HA	141	155	15	NAEGAPGGPYKIGTS	0	0	1	0
HA/NA	HA	146	160	15	PGGPYKIGTSGSCPN	0	0	1	0
HA/NA	HA	151	165	15	KIGTSGSCPNITNGN	0	0	1	0
HA/NA	HA	156	170	15	GSCPNITNGNGFFAT	0	0	1	0
HA/NA	HA	161	175	15	ITNGNGFFATMAWAV	0	0	1	0
HA/NA	HA	166	180	15	GFFATMAWAVPDKNK	0	0	1	0
HA/NA	HA	171	185	15	MAWAVPDKNKTATNP	0	0	1	0
HA/NA	HA	176	190	15	PDKNKTATNPLTIEV	0	0	1	0
HA/NA	HA	181	195	15	TATNPLTIEVPYVCT	0	0	1	0
HA/NA	HA	186	200	15	LTIEVPYVCTEGEDQ	0	0	1	0
HA/NA	HA	191	205	15	PYVCTEGEDQITVWG	0	0	1	0
HA/NA	HA	196	210	15	EGEDQITVWGFHSDN	0	0	1	0
HA/NA	HA	201	215	15	ITVWGFHSDNETQMA	0	0	1	0
HA/NA	HA	206	220	15	FHSDNETQMAKLYGD	0	0	1	0
HA/NA	HA	211	225	15	ETQMAKLYGDSKPQK	0	0	1	0
HA/NA	HA	216	230	15	KLYGDSKPQKFTSSA	0	0	1	0
HA/NA	HA	221	235	15	SKPQKFTSSANGVTT	0	0	1	0
HA/NA	HA	226	240	15	FTSSANGVTTHYVSQ	0	0	1	0
HA/NA	HA	231	245	15	NGVTTHYVSQIGGFP	0	0	1	0
HA/NA	HA	236	250	15	HYVSQIGGFPNQTED	0	0	1	0
HA/NA	HA	241	255	15	IGGFPNQTEDGGLPQ	0	0	1	0
HA/NA	HA	246	260	15	NQTEDGGLPQSGRIV	0	0	1	0
HA/NA	HA	251	265	15	GGLPQSGRIVVDYMV	0	0	1	0
HA/NA	HA	256	270	15	SGRIVVDYMVQKSGK	0	0	1	0
HA/NA	HA	261	275	15	VDYMVQKSGKTGTIT	0	0	1	0
HA/NA	HA	266	280	15	QKSGKTGTITYQRGI	0	0	1	0
HA/NA	HA	271	285	15	TGTITYQRGILLPQK	0	0	1	0
HA/NA	HA	276	290	15	YQRGILLPQKVWCAS	0	0	1	0
HA/NA	HA	281	295	15	LLPQKVWCASGRSKV	0	0	1	0
HA/NA	HA	286	300	15	VWCASGRSKVIKGSL	0	0	1	0
HA/NA	HA	291	305	15	GRSKVIKGSLPLIGE	0	0	1	0
HA/NA	HA	296	310	15	IKGSLPLIGEADCLH	0	0	1	0
HA/NA	HA	301	315	15	PLIGEADCLHEKYGG	0	0	1	0
HA/NA	HA	306	320	15	ADCLHEKYGGLNKSK	0	0	1	0
HA/NA	HA	311	325	15	EKYGGLNKSKPYYTG	0	0	1	0
HA/NA	HA	316	330	15	LNKSKPYYTGEHAKA	0	0	1	0
HA/NA	HA	321	335	15	PYYTGEHAKAIGNCP	0	0	1	0
HA/NA	HA	326	340	15	EHAKAIGNCPIWVKT	0	0	1	0
HA/NA	HA	331	345	15	IGNCPIWVKTPLKLA	0	0	1	0
HA/NA	HA	336	350	15	IWVKTPLKLANGTKY	0	0	1	0
HA/NA	HA	341	355	15	PLKLANGTKYRPPAK	0	0	1	0
HA/NA	HA	346	360	15	NGTKYRPPAKLLKER	0	0	1	0
HA/NA	HA	351	365	15	RPPAKLLKERGFFGA	0	0	1	0
HA/NA	HA	356	370	15	LLKERGFFGAIAGFL	0	0	1	0
HA/NA	HA	361	375	15	GFFGAIAGFLEGGWE	0	0	1	0
HA/NA	HA	366	380	15	IAGFLEGGWEGMIAG	0	0	1	0
HA/NA	HA	371	385	15	EGGWEGMIAGWHGYT	0	0	1	0
HA/NA	HA	376	390	15	GMIAGWHGYTSHGAH	0	0	1	0
HA/NA	HA	381	395	15	WHGYTSHGAHGVAVA	0	0	1	0
HA/NA	HA	386	400	15	SHGAHGVAVAADLKS	0	0	1	0
HA/NA	HA	391	405	15	GVAVAADLKSTQEAI	0	0	1	0
HA/NA	HA	396	410	15	ADLKSTQEAINKITK	0	0	1	0
HA/NA	HA	401	415	15	TQEAINKITKNLNSL	0	0	1	0
HA/NA	HA	406	420	15	NKITKNLNSLSELEV	0	0	1	0
HA/NA	HA	411	425	15	NLNSLSELEVKNLQR	0	0	1	0
HA/NA	HA	416	430	15	SELEVKNLQRLSGAM	0	0	1	0
HA/NA	HA	421	435	15	KNLQRLSGAMDELHN	0	0	1	0
HA/NA	HA	426	440	15	LSGAMDELHNEILEL	0	0	1	0
HA/NA	HA	431	445	15	DELHNEILELDEKVD	0	0	1	0
HA/NA	HA	436	450	15	EILELDEKVDDLRAD	0	0	1	0
HA/NA	HA	441	455	15	DEKVDDLRADTISSQ	0	0	1	0
HA/NA	HA	446	460	15	DLRADTISSQIELAV	0	0	1	0
HA/NA	HA	451	465	15	TISSQIELAVLLSNE	0	0	1	0
HA/NA	HA	456	470	15	IELAVLLSNEGIINS	0	0	1	0
HA/NA	HA	461	475	15	LLSNEGIINSEDEHL	0	0	1	0
HA/NA	HA	466	480	15	GIINSEDEHLLALER	0	0	1	0
HA/NA	HA	471	485	15	EDEHLLALERKLKKM	0	0	1	0
HA/NA	HA	476	490	15	LALERKLKKMLGPSA	0	0	1	0
HA/NA	HA	481	495	15	KLKKMLGPSAVEIGN	0	0	1	0
HA/NA	HA	486	500	15	LGPSAVEIGNGCFET	0	0	1	0
HA/NA	HA	491	505	15	VEIGNGCFETKHKCN	0	0	1	0
HA/NA	HA	496	510	15	GCFETKHKCNQTCLD	0	0	1	0
HA/NA	HA	501	515	15	KHKCNQTCLDKIAAG	0	0	1	0
HA/NA	HA	506	520	15	QTCLDKIAAGTFDAG	0	0	1	0
HA/NA	HA	511	525	15	KIAAGTFDAGEFSLP	0	0	1	0
HA/NA	HA	516	530	15	TFDAGEFSLPTFDSL	0	0	1	0
HA/NA	HA	521	535	15	EFSLPTFDSLNITAA	0	0	1	0
HA/NA	HA	526	540	15	TFDSLNITAASLNDD	0	0	1	0
HA/NA	HA	531	545	15	NITAASLNDDGLDNH	0	0	1	0
HA/NA	HA	536	550	15	SLNDDGLDNHTILLY	0	0	1	0
HA/NA	HA	541	555	15	GLDNHTILLYYSTAA	0	0	1	0
HA/NA	HA	546	560	15	TILLYYSTAASSLAV	0	0	1	0
HA/NA	HA	551	565	15	YSTAASSLAVTLMIA	0	0	1	0
HA/NA	HA	556	570	15	SSLAVTLMIAIFVVY	0	0	1	0
HA/NA	HA	561	575	15	TLMIAIFVVYMVSRD	0	0	1	0
HA/NA	HA	566	580	15	IFVVYMVSRDNVSCS	0	0	1	0
HA/NA	HA	571	583	13	MVSRDNVSCSICL	0	0	1	0
HA/NA	NA	1	15	15	MLPSTIQTLTLFLTS	0	0	1	0
HA/NA	NA	6	20	15	IQTLTLFLTSGGVLL	0	0	1	0
HA/NA	NA	11	25	15	LFLTSGGVLLSLYVS	0	0	1	0
HA/NA	NA	31	45	15	LLYSDILLKFSPTEI	0	0	1	0
HA/NA	NA	36	50	15	ILLKFSPTEITAPTM	0	0	1	0
HA/NA	NA	41	55	15	SPTEITAPTMPLDCA	0	0	1	0
HA/NA	NA	46	60	15	TAPTMPLDCANASNV	0	0	1	0
HA/NA	NA	61	75	15	QAVNRSATKGVTLLL	0	0	1	0
HA/NA	NA	66	80	15	SATKGVTLLLPGPEW	0	0	1	0
HA/NA	NA	71	85	15	VTLLLPGPEWTYPRL	0	0	1	0
HA/NA	NA	76	90	15	PGPEWTYPRLSCPGS	0	0	1	0
HA/NA	NA	106	120	15	TKGNSAPLIIREPFV	0	0	1	0
HA/NA	NA	111	125	15	APLIIREPFVACGPN	0	0	1	0
HA/NA	NA	116	130	15	REPFVACGPNECKHF	0	0	1	0
HA/NA	NA	121	135	15	ACGPNECKHFALTHY	0	0	1	0
HA/NA	NA	136	150	15	AAQPGGYYNGTRGDR	0	0	1	0
HA/NA	NA	141	155	15	GYYNGTRGDRNKLRH	0	0	1	0
HA/NA	NA	146	160	15	TRGDRNKLRHLISVK	0	0	1	0
HA/NA	NA	176	190	15	AWSGSACHDGKEWTY	0	0	1	0
HA/NA	NA	181	195	15	ACHDGKEWTYIGVDG	0	0	1	0
HA/NA	NA	186	200	15	KEWTYIGVDGPDNNA	0	0	1	0
HA/NA	NA	191	205	15	IGVDGPDNNALLKVK	0	0	1	0
HA/NA	NA	196	210	15	PDNNALLKVKYGEAY	0	0	1	0
HA/NA	NA	201	215	15	LLKVKYGEAYTDTYH	0	0	1	0
HA/NA	NA	206	220	15	YGEAYTDTYHSYANN	0	0	1	0
HA/NA	NA	211	225	15	TDTYHSYANNILRTQ	0	0	1	0
HA/NA	NA	216	230	15	SYANNILRTQESACN	0	0	1	0
HA/NA	NA	221	235	15	ILRTQESACNCIGGN	0	0	1	0
HA/NA	NA	226	240	15	ESACNCIGGNCYLMI	0	0	1	0
HA/NA	NA	231	245	15	CIGGNCYLMITDGSA	0	0	1	0
HA/NA	NA	236	250	15	CYLMITDGSASGVSE	0	0	1	0
HA/NA	NA	241	255	15	TDGSASGVSECRFLK	0	0	1	0
HA/NA	NA	246	260	15	SGVSECRFLKIREGR	0	0	1	0
HA/NA	NA	281	295	15	FASNKTIECACRDNR	0	0	1	0
HA/NA	NA	286	300	15	TIECACRDNRYTAKR	0	0	1	0
HA/NA	NA	291	305	15	CRDNRYTAKRPFVKL	0	0	1	0
HA/NA	NA	306	320	15	NVETDTAEIRLMCTD	0	0	1	0
HA/NA	NA	311	325	15	TAEIRLMCTDTYLDT	0	0	1	0
HA/NA	NA	316	330	15	LMCTDTYLDTPRPND	0	0	1	0
HA/NA	NA	331	345	15	GSITGPCESDGDKGS	0	0	1	0
HA/NA	NA	336	350	15	PCESDGDKGSGGIKG	0	0	1	0
HA/NA	NA	341	355	15	GDKGSGGIKGGFVHQ	0	0	1	0
HA/NA	NA	346	360	15	GGIKGGFVHQRMKSK	0	0	1	0
HA/NA	NA	351	365	15	GFVHQRMKSKIGRWY	0	0	1	0
HA/NA	NA	356	370	15	RMKSKIGRWYSRTMS	0	0	1	0
HA/NA	NA	361	375	15	IGRWYSRTMSKTERM	0	0	1	0
HA/NA	NA	366	380	15	SRTMSKTERMGMGLY	0	0	1	0
HA/NA	NA	371	385	15	KTERMGMGLYVKYGG	0	0	1	0
HA/NA	NA	376	390	15	GMGLYVKYGGDPWAD	0	0	1	0
HA/NA	NA	381	395	15	VKYGGDPWADSDALA	0	0	1	0
HA/NA	NA	386	400	15	DPWADSDALAFSGVM	0	0	1	0
HA/NA	NA	391	405	15	SDALAFSGVMVPMKE	0	0	1	0
HA/NA	NA	396	410	15	FSGVMVPMKEPGWYS	0	0	1	0
HA/NA	NA	401	415	15	VPMKEPGWYSFGFEI	0	0	1	0
HA/NA	NA	426	440	15	GIEMVHDGGKETWHS	0	0	1	0
HA/NA	NA	431	445	15	HDGGKETWHSAATAI	0	0	1	0
HA/NA	NA	436	450	15	ETWHSAATAIYCLMG	0	0	1	0
HA/NA	NA	451	465	15	SGQLLWDTVTGVDMA	0	0	1	0
HA/NA	NA	456	466	11	WDTVTGVDMAL	0	0	1	0
HA/NA	HA	41	55	15	VTGVIPLTTTPTKSY	0	0	0	1
HA/NA	HA	46	60	15	PLTTTPTKSYFANLK	0	0	0	1
HA/NA	HA	51	65	15	PTKSYFANLKGTRTR	0	0	0	1
HA/NA	HA	56	70	15	FANLKGTRTRGKLCP	0	0	0	1
HA/NA	HA	61	75	15	GTRTRGKLCPDCLNC	0	0	0	1
HA/NA	HA	66	80	15	GKLCPDCLNCTDLDV	0	0	0	1
HA/NA	HA	71	85	15	DCLNCTDLDVALGRP	0	0	0	1
HA/NA	HA	76	90	15	TDLDVALGRPMCVGT	0	0	0	1
HA/NA	HA	81	95	15	ALGRPMCVGTTPSAK	0	0	0	1
HA/NA	HA	86	100	15	MCVGTTPSAKASILH	0	0	0	1
HA/NA	HA	91	105	15	TPSAKASILHEVRPV	0	0	0	1
HA/NA	HA	96	110	15	ASILHEVRPVTSGCF	0	0	0	1
HA/NA	HA	121	135	15	QLPNLLRGYEKIRLS	0	0	0	1
HA/NA	HA	126	140	15	LRGYEKIRLSTQNVI	0	0	0	1
HA/NA	HA	131	145	15	KIRLSTQNVIDAEKA	0	0	0	1
HA/NA	HA	136	150	15	TQNVIDAEKAPGGPY	0	0	0	1
HA/NA	HA	141	155	15	DAEKAPGGPYRLGTS	0	0	0	1
HA/NA	HA	146	160	15	PGGPYRLGTSGSCPN	0	0	0	1
HA/NA	HA	151	165	15	RLGTSGSCPNATSKI	0	0	0	1
HA/NA	HA	156	170	15	GSCPNATSKIGFFST	0	0	0	1
HA/NA	HA	161	175	15	ATSKIGFFSTMAWAV	0	0	0	1
HA/NA	HA	166	180	15	GFFSTMAWAVPKDNY	0	0	0	1
HA/NA	HA	171	185	15	MAWAVPKDNYKNATN	0	0	0	1
HA/NA	HA	176	190	15	PKDNYKNATNPQTVE	0	0	0	1
HA/NA	HA	181	195	15	KNATNPQTVEVPYIC	0	0	0	1
HA/NA	HA	186	200	15	PQTVEVPYICTEGED	0	0	0	1
HA/NA	HA	191	205	15	VPYICTEGEDQITVW	0	0	0	1
HA/NA	HA	196	210	15	TEGEDQITVWGFHSD	0	0	0	1
HA/NA	HA	201	215	15	QITVWGFHSDNKTQM	0	0	0	1
HA/NA	HA	206	220	15	GFHSDNKTQMKSLYG	0	0	0	1
HA/NA	HA	211	225	15	NKTQMKSLYGDSNPQ	0	0	0	1
HA/NA	HA	216	230	15	KSLYGDSNPQKFTSS	0	0	0	1
HA/NA	HA	221	235	15	DSNPQKFTSSANGVT	0	0	0	1
HA/NA	HA	226	240	15	KFTSSANGVTTHYVS	0	0	0	1
HA/NA	HA	231	245	15	ANGVTTHYVSQIGDF	0	0	0	1
HA/NA	HA	236	250	15	THYVSQIGDFPDQTE	0	0	0	1
HA/NA	HA	241	255	15	QIGDFPDQTEDGGLP	0	0	0	1
HA/NA	HA	246	260	15	PDQTEDGGLPQSGRI	0	0	0	1
HA/NA	HA	251	265	15	DGGLPQSGRIVVDYM	0	0	0	1
HA/NA	HA	256	270	15	QSGRIVVDYMVQKPG	0	0	0	1
HA/NA	HA	261	275	15	VVDYMVQKPGKTGTI	0	0	0	1
HA/NA	HA	266	280	15	VQKPGKTGTIVYQRG	0	0	0	1
HA/NA	HA	271	285	15	KTGTIVYQRGVLLPQ	0	0	0	1
HA/NA	HA	276	290	15	VYQRGVLLPQKVWCA	0	0	0	1
HA/NA	HA	281	295	15	VLLPQKVWCASGRSK	0	0	0	1
HA/NA	HA	286	300	15	KVWCASGRSKVIKGS	0	0	0	1
HA/NA	HA	291	305	15	SGRSKVIKGSLPLIG	0	0	0	1
HA/NA	HA	296	310	15	VIKGSLPLIGEADCL	0	0	0	1
HA/NA	HA	301	315	15	LPLIGEADCLHEEYG	0	0	0	1
HA/NA	HA	306	320	15	EADCLHEEYGGLNKS	0	0	0	1
HA/NA	HA	311	325	15	HEEYGGLNKSKPYYT	0	0	0	1
HA/NA	HA	316	330	15	GLNKSKPYYTGKHAK	0	0	0	1
HA/NA	HA	321	335	15	KPYYTGKHAKAIGNC	0	0	0	1
HA/NA	HA	326	340	15	GKHAKAIGNCPIWVK	0	0	0	1
HA/NA	HA	331	345	15	AIGNCPIWVKTPLKL	0	0	0	1
HA/NA	HA	336	350	15	PIWVKTPLKLANGTK	0	0	0	1
HA/NA	HA	341	355	15	TPLKLANGTKYRPPA	0	0	0	1
HA/NA	HA	346	360	15	ANGTKYRPPAKLLKE	0	0	0	1
HA/NA	HA	351	365	15	YRPPAKLLKERGFFG	0	0	0	1
HA/NA	HA	356	370	15	KLLKERGFFGAIAGF	0	0	0	1
HA/NA	HA	361	375	15	RGFFGAIAGFLEGGW	0	0	0	1
HA/NA	HA	366	380	15	AIAGFLEGGWEGMIA	0	0	0	1
HA/NA	HA	371	385	15	LEGGWEGMIAGWHGY	0	0	0	1
HA/NA	HA	376	390	15	EGMIAGWHGYTSHGA	0	0	0	1
HA/NA	HA	381	395	15	GWHGYTSHGAHGVAV	0	0	0	1
HA/NA	HA	386	400	15	TSHGAHGVAVAADLK	0	0	0	1
HA/NA	HA	391	405	15	HGVAVAADLKSTQEA	0	0	0	1
HA/NA	HA	396	410	15	AADLKSTQEAINKIT	0	0	0	1
HA/NA	HA	401	415	15	STQEAINKITKNLNS	0	0	0	1
HA/NA	HA	406	420	15	INKITKNLNSLSELE	0	0	0	1
HA/NA	HA	411	425	15	KNLNSLSELEVKNLQ	0	0	0	1
HA/NA	HA	416	430	15	LSELEVKNLQRLSGA	0	0	0	1
HA/NA	HA	421	435	15	VKNLQRLSGAMDELH	0	0	0	1
HA/NA	HA	426	440	15	RLSGAMDELHNEILE	0	0	0	1
HA/NA	HA	431	445	15	MDELHNEILELDEKV	0	0	0	1
HA/NA	HA	436	450	15	NEILELDEKVDDLRA	0	0	0	1
HA/NA	HA	441	455	15	LDEKVDDLRADTISS	0	0	0	1
HA/NA	HA	446	460	15	DDLRADTISSQIELA	0	0	0	1
HA/NA	HA	451	465	15	DTISSQIELAVLLSN	0	0	0	1
HA/NA	HA	456	470	15	QIELAVLLSNEGIIN	0	0	0	1
HA/NA	HA	461	475	15	VLLSNEGIINSEDEH	0	0	0	1
HA/NA	HA	466	480	15	EGIINSEDEHLLALE	0	0	0	1
HA/NA	HA	471	485	15	SEDEHLLALERKLKK	0	0	0	1
HA/NA	HA	476	490	15	LLALERKLKKMLGPS	0	0	0	1
HA/NA	HA	481	495	15	RKLKKMLGPSAVDIG	0	0	0	1
HA/NA	HA	486	500	15	MLGPSAVDIGNGCFE	0	0	0	1
HA/NA	HA	491	505	15	AVDIGNGCFETKHKC	0	0	0	1
HA/NA	HA	496	510	15	NGCFETKHKCNQTCL	0	0	0	1
HA/NA	HA	501	515	15	TKHKCNQTCLDRIAA	0	0	0	1
HA/NA	HA	506	520	15	NQTCLDRIAAGTFNA	0	0	0	1
HA/NA	HA	511	525	15	DRIAAGTFNAGEYSL	0	0	0	1
HA/NA	HA	516	530	15	GTFNAGEYSLPTFDS	0	0	0	1
HA/NA	HA	521	535	15	GEYSLPTFDSLNITA	0	0	0	1
HA/NA	HA	526	540	15	PTFDSLNITAASLND	0	0	0	1
HA/NA	HA	531	545	15	LNITAASLNDDGLDN	0	0	0	1
HA/NA	HA	536	550	15	ASLNDDGLDNHTILL	0	0	0	1
HA/NA	HA	541	555	15	DGLDNHTILLYYSTA	0	0	0	1
HA/NA	HA	546	560	15	HTILLYYSTAASSLA	0	0	0	1
HA/NA	HA	551	565	15	YYSTAASSLAVTLML	0	0	0	1
HA/NA	HA	556	570	15	ASSLAVTLMLAIFIV	0	0	0	1
HA/NA	HA	561	575	15	VTLMLAIFIVYMVSR	0	0	0	1
HA/NA	HA	566	580	15	AIFIVYMVSRDNVSC	0	0	0	1
HA/NA	HA	571	584	14	YMVSRDNVSCSICL	0	0	0	1
HA/NA	NA	1	15	15	MLPSTIQTLTLFLTL	0	0	0	1
HA/NA	NA	6	20	15	IQTLTLFLTLGGVLL	0	0	0	1
HA/NA	NA	11	25	15	LFLTLGGVLLSLYVS	0	0	0	1
HA/NA	NA	31	45	15	LLYSDILLKFSRTEV	0	0	0	1
HA/NA	NA	36	50	15	ILLKFSRTEVTAPIM	0	0	0	1
HA/NA	NA	41	55	15	SRTEVTAPIMPLDCA	0	0	0	1
HA/NA	NA	46	60	15	TAPIMPLDCANASNV	0	0	0	1
HA/NA	NA	61	75	15	QAVNRSATKGVTPLL	0	0	0	1
HA/NA	NA	66	80	15	SATKGVTPLLPEPEW	0	0	0	1
HA/NA	NA	71	85	15	VTPLLPEPEWTYPRL	0	0	0	1
HA/NA	NA	76	90	15	PEPEWTYPRLSCPGS	0	0	0	1
HA/NA	NA	106	120	15	TKGNSAPLIIREPFI	0	0	0	1
HA/NA	NA	111	125	15	APLIIREPFIACGPK	0	0	0	1
HA/NA	NA	116	130	15	REPFIACGPKECKHF	0	0	0	1
HA/NA	NA	121	135	15	ACGPKECKHFALTHY	0	0	0	1
HA/NA	NA	136	150	15	AAQPGGYYNGTREDR	0	0	0	1
HA/NA	NA	141	155	15	GYYNGTREDRNKLRH	0	0	0	1
HA/NA	NA	146	160	15	TREDRNKLRHLISVK	0	0	0	1
HA/NA	NA	176	190	15	AWSGSACHDGREWTY	0	0	0	1
HA/NA	NA	181	195	15	ACHDGREWTYIGVDG	0	0	0	1
HA/NA	NA	186	200	15	REWTYIGVDGPDSNA	0	0	0	1
HA/NA	NA	191	205	15	IGVDGPDSNALLKIK	0	0	0	1
HA/NA	NA	196	210	15	PDSNALLKIKYGEAY	0	0	0	1
HA/NA	NA	201	215	15	LLKIKYGEAYTDTYH	0	0	0	1
HA/NA	NA	206	220	15	YGEAYTDTYHSYAKN	0	0	0	1
HA/NA	NA	211	225	15	TDTYHSYAKNILRTQ	0	0	0	1
HA/NA	NA	216	230	15	SYAKNILRTQESACN	0	0	0	1
HA/NA	NA	221	235	15	ILRTQESACNCIGGD	0	0	0	1
HA/NA	NA	226	240	15	ESACNCIGGDCYLMI	0	0	0	1
HA/NA	NA	231	245	15	CIGGDCYLMITDGPA	0	0	0	1
HA/NA	NA	236	250	15	CYLMITDGPASGISE	0	0	0	1
HA/NA	NA	241	255	15	TDGPASGISECRFLK	0	0	0	1
HA/NA	NA	246	260	15	SGISECRFLKIREGR	0	0	0	1
HA/NA	NA	281	295	15	FASNKTIECACRDNS	0	0	0	1
HA/NA	NA	286	300	15	TIECACRDNSYTAKR	0	0	0	1
HA/NA	NA	291	305	15	CRDNSYTAKRPFVKL	0	0	0	1
HA/NA	NA	306	320	15	NVETDTAEIRLMCTK	0	0	0	1
HA/NA	NA	311	325	15	TAEIRLMCTKTYLDT	0	0	0	1
HA/NA	NA	316	330	15	LMCTKTYLDTPRPND	0	0	0	1
HA/NA	NA	331	345	15	GSITGPCESDGNEGG	0	0	0	1
HA/NA	NA	336	350	15	PCESDGNEGGGGIKG	0	0	0	1
HA/NA	NA	341	355	15	GNEGGGGIKGGFVHQ	0	0	0	1
HA/NA	NA	346	360	15	GGIKGGFVHQRMASK	0	0	0	1
HA/NA	NA	351	365	15	GFVHQRMASKIGRWY	0	0	0	1
HA/NA	NA	356	370	15	RMASKIGRWYSRTMS	0	0	0	1
HA/NA	NA	361	375	15	IGRWYSRTMSKTQRM	0	0	0	1
HA/NA	NA	366	380	15	SRTMSKTQRMGMGLY	0	0	0	1
HA/NA	NA	371	385	15	KTQRMGMGLYVKYDG	0	0	0	1
HA/NA	NA	376	390	15	GMGLYVKYDGDPWTD	0	0	0	1
HA/NA	NA	381	395	15	VKYDGDPWTDSEALA	0	0	0	1
HA/NA	NA	386	400	15	DPWTDSEALALSGVM	0	0	0	1
HA/NA	NA	391	405	15	SEALALSGVMVSMGE	0	0	0	1
HA/NA	NA	396	410	15	LSGVMVSMGEPGWYS	0	0	0	1
HA/NA	NA	401	415	15	VSMGEPGWYSFGFEI	0	0	0	1
HA/NA	NA	426	440	15	GIEMVHDGGKTTWHS	0	0	0	1
HA/NA	NA	431	445	15	HDGGKTTWHSAATAI	0	0	0	1
HA/NA	NA	436	450	15	TTWHSAATAIYCLMG	0	0	0	1
HA/NA	NA	451	465	15	SGQLLWDTVTGVNMT	0	0	0	1
HA/NA	NA	456	466	11	WDTVTGVNMTL	0	0	0	1

## Sheet: PA-PB1
Supplementary Table S2. Composition of the Human Influenza A and B viruses homologs of PA/PB1 epitopes.
MP	Protein	start	End	Length	Sequence	A/H1N1	A/H3N2	B/IOWA	B/SING	ALL	A	B
PA/PB1	PB1	226	240	15	TMTKDAERGKLKRRA	1	1	1	1	Shared
PA/PB1	PB1	266	280	15	LEQSGLPVGGNEKKA	1	1	1	1	Shared
PA/PB1	PA	1	15	15	MEDFVRQCFNPMIVE	1	1	0	0		Shared
PA/PB1	PA	21	35	15	MKEYGEDLKIETNKF	1	1	0	0		Shared
PA/PB1	PA	26	40	15	EDLKIETNKFAAICT	1	1	0	0		Shared
PA/PB1	PA	31	45	15	ETNKFAAICTHLEVC	1	1	0	0		Shared
PA/PB1	PA	36	50	15	AAICTHLEVCFMYSD	1	1	0	0		Shared
PA/PB1	PA	41	55	15	HLEVCFMYSDFHFIN	1	1	0	0		Shared
PA/PB1	PA	46	60	15	FMYSDFHFINEQGES	1	1	0	0		Shared
PA/PB1	PA	71	85	15	LLKHRFEIIEGRDRT	1	1	0	0		Shared
PA/PB1	PA	76	90	15	FEIIEGRDRTMAWTV	1	1	0	0		Shared
PA/PB1	PA	81	95	15	GRDRTMAWTVVNSIC	1	1	0	0		Shared
PA/PB1	PA	86	100	15	MAWTVVNSICNTTGA	1	1	0	0		Shared
PA/PB1	PA	106	120	15	LPDLYDYKENRFIEI	1	1	0	0		Shared
PA/PB1	PA	111	125	15	DYKENRFIEIGVTRR	1	1	0	0		Shared
PA/PB1	PA	116	130	15	RFIEIGVTRREVHIY	1	1	0	0		Shared
PA/PB1	PA	121	135	15	GVTRREVHIYYLEKA	1	1	0	0		Shared
PA/PB1	PA	126	140	15	EVHIYYLEKANKIKS	1	1	0	0		Shared
PA/PB1	PA	146	160	15	HIFSFTGEEMATKAD	1	1	0	0		Shared
PA/PB1	PA	151	165	15	TGEEMATKADYTLDE	1	1	0	0		Shared
PA/PB1	PA	156	170	15	ATKADYTLDEESRAR	1	1	0	0		Shared
PA/PB1	PA	161	175	15	YTLDEESRARIKTRL	1	1	0	0		Shared
PA/PB1	PA	166	180	15	ESRARIKTRLFTIRQ	1	1	0	0		Shared
PA/PB1	PA	186	200	15	GLWDSFRQSERGEET	1	1	0	0		Shared
PA/PB1	PA	226	240	15	LENFRAYVDGFEPNG	1	1	0	0		Shared
PA/PB1	PA	281	295	15	KFLLMDALKLSIEDP	1	1	0	0		Shared
PA/PB1	PA	286	300	15	DALKLSIEDPSHEGE	1	1	0	0		Shared
PA/PB1	PA	291	305	15	SIEDPSHEGEGIPLY	1	1	0	0		Shared
PA/PB1	PA	296	310	15	SHEGEGIPLYDAIKC	1	1	0	0		Shared
PA/PB1	PA	361	375	15	KKTSQLKWALGENMA	1	1	0	0		Shared
PA/PB1	PA	366	380	15	LKWALGENMAPEKVD	1	1	0	0		Shared
PA/PB1	PA	426	440	15	DEIGEDVAPIEHIAS	1	1	0	0		Shared
PA/PB1	PA	431	445	15	DVAPIEHIASMRRNY	1	1	0	0		Shared
PA/PB1	PA	451	465	15	SHCRATEYIMKGVYI	1	1	0	0		Shared
PA/PB1	PA	456	470	15	TEYIMKGVYINTALL	1	1	0	0		Shared
PA/PB1	PA	461	475	15	KGVYINTALLNASCA	1	1	0	0		Shared
PA/PB1	PA	466	480	15	NTALLNASCAAMDDF	1	1	0	0		Shared
PA/PB1	PA	471	485	15	NASCAAMDDFQLIPM	1	1	0	0		Shared
PA/PB1	PA	476	490	15	AMDDFQLIPMISKCR	1	1	0	0		Shared
PA/PB1	PA	481	495	15	QLIPMISKCRTKEGR	1	1	0	0		Shared
PA/PB1	PA	486	500	15	ISKCRTKEGRRKTNL	1	1	0	0		Shared
PA/PB1	PA	491	505	15	TKEGRRKTNLYGFII	1	1	0	0		Shared
PA/PB1	PA	496	510	15	RKTNLYGFIIKGRSH	1	1	0	0		Shared
PA/PB1	PA	501	515	15	YGFIIKGRSHLRNDT	1	1	0	0		Shared
PA/PB1	PA	506	520	15	KGRSHLRNDTDVVNF	1	1	0	0		Shared
PA/PB1	PA	511	525	15	LRNDTDVVNFVSMEF	1	1	0	0		Shared
PA/PB1	PA	516	530	15	DVVNFVSMEFSLTDP	1	1	0	0		Shared
PA/PB1	PA	521	535	15	VSMEFSLTDPRLEPH	1	1	0	0		Shared
PA/PB1	PA	526	540	15	SLTDPRLEPHKWEKY	1	1	0	0		Shared
PA/PB1	PA	531	545	15	RLEPHKWEKYCVLEI	1	1	0	0		Shared
PA/PB1	PA	576	590	15	KWGMEMRRCLLQSLQ	1	1	0	0		Shared
PA/PB1	PA	581	595	15	MRRCLLQSLQQIESM	1	1	0	0		Shared
PA/PB1	PA	586	600	15	LQSLQQIESMIEAES	1	1	0	0		Shared
PA/PB1	PA	591	605	15	QIESMIEAESSVKEK	1	1	0	0		Shared
PA/PB1	PA	596	610	15	IEAESSVKEKDMTKE	1	1	0	0		Shared
PA/PB1	PA	601	615	15	SVKEKDMTKEFFENK	1	1	0	0		Shared
PA/PB1	PA	636	650	15	VCRTLLAKSVFNSLY	1	1	0	0		Shared
PA/PB1	PA	641	655	15	LAKSVFNSLYASPQL	1	1	0	0		Shared
PA/PB1	PA	646	660	15	FNSLYASPQLEGFSA	1	1	0	0		Shared
PA/PB1	PA	651	665	15	ASPQLEGFSAESRKL	1	1	0	0		Shared
PA/PB1	PA	656	670	15	EGFSAESRKLLLIVQ	1	1	0	0		Shared
PA/PB1	PA	676	690	15	LEPGTFDLGGLYEAI	1	1	0	0		Shared
PA/PB1	PA	681	695	15	FDLGGLYEAIEECLI	1	1	0	0		Shared
PA/PB1	PA	686	700	15	LYEAIEECLINDPWV	1	1	0	0		Shared
PA/PB1	PA	691	705	15	EECLINDPWVLLNAS	1	1	0	0		Shared
PA/PB1	PA	696	710	15	NDPWVLLNASWFNSF	1	1	0	0		Shared
PA/PB1	PA	701	715	15	LLNASWFNSFLTHAL	1	1	0	0		Shared
PA/PB1	PB1	16	30	15	NAISTTFPYTGDPPY	1	1	0	0		Shared
PA/PB1	PB1	21	35	15	TFPYTGDPPYSHGTG	1	1	0	0		Shared
PA/PB1	PB1	26	40	15	GDPPYSHGTGTGYTM	1	1	0	0		Shared
PA/PB1	PB1	31	45	15	SHGTGTGYTMDTVNR	1	1	0	0		Shared
PA/PB1	PB1	36	50	15	TGYTMDTVNRTHQYS	1	1	0	0		Shared
PA/PB1	PB1	56	70	15	TTNTETGAPQLNPID	1	1	0	0		Shared
PA/PB1	PB1	61	75	15	TGAPQLNPIDGPLPE	1	1	0	0		Shared
PA/PB1	PB1	66	80	15	LNPIDGPLPEDNEPS	1	1	0	0		Shared
PA/PB1	PB1	71	85	15	GPLPEDNEPSGYAQT	1	1	0	0		Shared
PA/PB1	PB1	76	90	15	DNEPSGYAQTDCVLE	1	1	0	0		Shared
PA/PB1	PB1	81	95	15	GYAQTDCVLEAMAFL	1	1	0	0		Shared
PA/PB1	PB1	86	100	15	DCVLEAMAFLEESHP	1	1	0	0		Shared
PA/PB1	PB1	91	105	15	AMAFLEESHPGIFEN	1	1	0	0		Shared
PA/PB1	PB1	96	110	15	EESHPGIFENSCLET	1	1	0	0		Shared
PA/PB1	PB1	126	140	15	RQTYDWTLNRNQPAA	1	1	0	0		Shared
PA/PB1	PB1	131	145	15	WTLNRNQPAATALAN	1	1	0	0		Shared
PA/PB1	PB1	136	150	15	NQPAATALANTIEVF	1	1	0	0		Shared
PA/PB1	PB1	141	155	15	TALANTIEVFRSNGL	1	1	0	0		Shared
PA/PB1	PB1	146	160	15	TIEVFRSNGLTANES	1	1	0	0		Shared
PA/PB1	PB1	151	165	15	RSNGLTANESGRLID	1	1	0	0		Shared
PA/PB1	PB1	156	170	15	TANESGRLIDFLKDV	1	1	0	0		Shared
PA/PB1	PB1	161	175	15	GRLIDFLKDVMESMD	1	1	0	0		Shared
PA/PB1	PB1	181	195	15	ITTHFQRKRRVRDNM	1	1	0	0		Shared
PA/PB1	PB1	186	200	15	QRKRRVRDNMTKKMV	1	1	0	0		Shared
PA/PB1	PB1	191	205	15	VRDNMTKKMVTQRTI	1	1	0	0		Shared
PA/PB1	PB1	196	210	15	TKKMVTQRTIGKKKQ	1	1	0	0		Shared
PA/PB1	PB1	201	215	15	TQRTIGKKKQRVNKR	1	1	0	0		Shared
PA/PB1	PB1	221	235	15	ALTLNTMTKDAERGK	1	1	0	0		Shared
PA/PB1	PB1	231	245	15	AERGKLKRRAIATPG	1	1	0	0		Shared
PA/PB1	PB1	236	250	15	LKRRAIATPGMQIRG	1	1	0	0		Shared
PA/PB1	PB1	241	255	15	IATPGMQIRGFVYFV	1	1	0	0		Shared
PA/PB1	PB1	246	260	15	MQIRGFVYFVETLAR	1	1	0	0		Shared
PA/PB1	PB1	251	265	15	FVYFVETLARSICEK	1	1	0	0		Shared
PA/PB1	PB1	256	270	15	ETLARSICEKLEQSG	1	1	0	0		Shared
PA/PB1	PB1	261	275	15	SICEKLEQSGLPVGG	1	1	0	0		Shared
PA/PB1	PB1	271	285	15	LPVGGNEKKAKLANV	1	1	0	0		Shared
PA/PB1	PB1	276	290	15	NEKKAKLANVVRKMM	1	1	0	0		Shared
PA/PB1	PB1	281	295	15	KLANVVRKMMTNSQD	1	1	0	0		Shared
PA/PB1	PB1	286	300	15	VRKMMTNSQDTELSF	1	1	0	0		Shared
PA/PB1	PB1	291	305	15	TNSQDTELSFTITGD	1	1	0	0		Shared
PA/PB1	PB1	296	310	15	TELSFTITGDNTKWN	1	1	0	0		Shared
PA/PB1	PB1	301	315	15	TITGDNTKWNENQNP	1	1	0	0		Shared
PA/PB1	PB1	306	320	15	NTKWNENQNPRMFLA	1	1	0	0		Shared
PA/PB1	PB1	311	325	15	ENQNPRMFLAMITYI	1	1	0	0		Shared
PA/PB1	PB1	316	330	15	RMFLAMITYITKNQP	1	1	0	0		Shared
PA/PB1	PB1	321	335	15	MITYITKNQPEWFRN	1	1	0	0		Shared
PA/PB1	PB1	326	340	15	TKNQPEWFRNILSIA	1	1	0	0		Shared
PA/PB1	PB1	331	345	15	EWFRNILSIAPIMFS	1	1	0	0		Shared
PA/PB1	PB1	336	350	15	ILSIAPIMFSNKMAR	1	1	0	0		Shared
PA/PB1	PB1	341	355	15	PIMFSNKMARLGKGY	1	1	0	0		Shared
PA/PB1	PB1	346	360	15	NKMARLGKGYMFESK	1	1	0	0		Shared
PA/PB1	PB1	351	365	15	LGKGYMFESKRMKLR	1	1	0	0		Shared
PA/PB1	PB1	356	370	15	MFESKRMKLRTQIPA	1	1	0	0		Shared
PA/PB1	PB1	361	375	15	RMKLRTQIPAEMLAS	1	1	0	0		Shared
PA/PB1	PB1	366	380	15	TQIPAEMLASIDLKY	1	1	0	0		Shared
PA/PB1	PA	1	15	15	MDTFITRNFQTTIIQ	0	0	1	1			Shared
PA/PB1	PA	6	20	15	TRNFQTTIIQKAKNT	0	0	1	1			Shared
PA/PB1	PA	11	25	15	TTIIQKAKNTMAEFS	0	0	1	1			Shared
PA/PB1	PA	16	30	15	KAKNTMAEFSEDPEL	0	0	1	1			Shared
PA/PB1	PA	21	35	15	MAEFSEDPELQPAML	0	0	1	1			Shared
PA/PB1	PA	26	40	15	EDPELQPAMLFNICV	0	0	1	1			Shared
PA/PB1	PA	31	45	15	QPAMLFNICVHLEVC	0	0	1	1			Shared
PA/PB1	PA	36	50	15	FNICVHLEVCYVISD	0	0	1	1			Shared
PA/PB1	PA	41	55	15	HLEVCYVISDMNFLD	0	0	1	1			Shared
PA/PB1	PA	46	60	15	YVISDMNFLDEEGKA	0	0	1	1			Shared
PA/PB1	PA	51	65	15	MNFLDEEGKAYTALE	0	0	1	1			Shared
PA/PB1	PA	56	70	15	EEGKAYTALEGQGKE	0	0	1	1			Shared
PA/PB1	PA	61	75	15	YTALEGQGKEQNLRP	0	0	1	1			Shared
PA/PB1	PA	66	80	15	GQGKEQNLRPQYEVI	0	0	1	1			Shared
PA/PB1	PA	71	85	15	QNLRPQYEVIEGMPR	0	0	1	1			Shared
PA/PB1	PA	76	90	15	QYEVIEGMPRTIAWM	0	0	1	1			Shared
PA/PB1	PA	81	95	15	EGMPRTIAWMVQRSL	0	0	1	1			Shared
PA/PB1	PA	86	100	15	TIAWMVQRSLAQEHG	0	0	1	1			Shared
PA/PB1	PA	91	105	15	VQRSLAQEHGIETPK	0	0	1	1			Shared
PA/PB1	PA	96	110	15	AQEHGIETPKYLADL	0	0	1	1			Shared
PA/PB1	PA	101	115	15	IETPKYLADLFDYKT	0	0	1	1			Shared
PA/PB1	PA	106	120	15	YLADLFDYKTKRFIE	0	0	1	1			Shared
PA/PB1	PA	111	125	15	FDYKTKRFIEVGITK	0	0	1	1			Shared
PA/PB1	PA	116	130	15	KRFIEVGITKGLADD	0	0	1	1			Shared
PA/PB1	PA	121	135	15	VGITKGLADDYFWKK	0	0	1	1			Shared
PA/PB1	PA	126	140	15	GLADDYFWKKKEKLG	0	0	1	1			Shared
PA/PB1	PA	131	145	15	YFWKKKEKLGNSMEL	0	0	1	1			Shared
PA/PB1	PA	136	150	15	KEKLGNSMELMIFSY	0	0	1	1			Shared
PA/PB1	PA	141	155	15	NSMELMIFSYNQDYS	0	0	1	1			Shared
PA/PB1	PA	146	160	15	MIFSYNQDYSLSNES	0	0	1	1			Shared
PA/PB1	PA	151	165	15	NQDYSLSNESSLDEE	0	0	1	1			Shared
PA/PB1	PA	156	170	15	LSNESSLDEEGKGRV	0	0	1	1			Shared
PA/PB1	PA	161	175	15	SLDEEGKGRVLSRLT	0	0	1	1			Shared
PA/PB1	PA	166	180	15	GKGRVLSRLTELQAE	0	0	1	1			Shared
PA/PB1	PA	171	185	15	LSRLTELQAELSLKN	0	0	1	1			Shared
PA/PB1	PA	176	190	15	ELQAELSLKNLWQVL	0	0	1	1			Shared
PA/PB1	PA	181	195	15	LSLKNLWQVLIGEED	0	0	1	1			Shared
PA/PB1	PA	186	200	15	LWQVLIGEEDVEKGI	0	0	1	1			Shared
PA/PB1	PA	206	220	15	QTISRLRDISVPAGF	0	0	1	1			Shared
PA/PB1	PA	211	225	15	LRDISVPAGFSNFEG	0	0	1	1			Shared
PA/PB1	PA	216	230	15	VPAGFSNFEGMRSYI	0	0	1	1			Shared
PA/PB1	PA	221	235	15	SNFEGMRSYIDNIDP	0	0	1	1			Shared
PA/PB1	PA	226	240	15	MRSYIDNIDPKGAIE	0	0	1	1			Shared
PA/PB1	PA	231	245	15	DNIDPKGAIERNLAR	0	0	1	1			Shared
PA/PB1	PA	236	250	15	KGAIERNLARMSPLV	0	0	1	1			Shared
PA/PB1	PA	241	255	15	RNLARMSPLVSVTPK	0	0	1	1			Shared
PA/PB1	PA	276	290	15	EVPYNAFLLMSDELG	0	0	1	1			Shared
PA/PB1	PA	281	295	15	AFLLMSDELGLANMT	0	0	1	1			Shared
PA/PB1	PA	286	300	15	SDELGLANMTEGKSK	0	0	1	1			Shared
PA/PB1	PA	291	305	15	LANMTEGKSKKPKTL	0	0	1	1			Shared
PA/PB1	PA	296	310	15	EGKSKKPKTLAKECL	0	0	1	1			Shared
PA/PB1	PA	301	315	15	KPKTLAKECLEKYST	0	0	1	1			Shared
PA/PB1	PA	306	320	15	AKECLEKYSTLRDQT	0	0	1	1			Shared
PA/PB1	PA	311	325	15	EKYSTLRDQTDPILI	0	0	1	1			Shared
PA/PB1	PA	316	330	15	LRDQTDPILIMKSEK	0	0	1	1			Shared
PA/PB1	PA	321	335	15	DPILIMKSEKANENF	0	0	1	1			Shared
PA/PB1	PA	326	340	15	MKSEKANENFLWKLW	0	0	1	1			Shared
PA/PB1	PA	331	345	15	ANENFLWKLWRDCVN	0	0	1	1			Shared
PA/PB1	PA	336	350	15	LWKLWRDCVNTISNE	0	0	1	1			Shared
PA/PB1	PA	356	370	15	LQKTNYAKWATGDGL	0	0	1	1			Shared
PA/PB1	PA	361	375	15	YAKWATGDGLTYQKI	0	0	1	1			Shared
PA/PB1	PA	366	380	15	TGDGLTYQKIMKEVA	0	0	1	1			Shared
PA/PB1	PA	371	385	15	TYQKIMKEVAIDDET	0	0	1	1			Shared
PA/PB1	PA	376	390	15	MKEVAIDDETMCQEE	0	0	1	1			Shared
PA/PB1	PA	381	395	15	IDDETMCQEEPKIPN	0	0	1	1			Shared
PA/PB1	PA	386	400	15	MCQEEPKIPNKCRVA	0	0	1	1			Shared
PA/PB1	PA	391	405	15	PKIPNKCRVAAWVQT	0	0	1	1			Shared
PA/PB1	PA	396	410	15	KCRVAAWVQTEMNLL	0	0	1	1			Shared
PA/PB1	PA	401	415	15	AWVQTEMNLLSTLTS	0	0	1	1			Shared
PA/PB1	PA	406	420	15	EMNLLSTLTSKRALD	0	0	1	1			Shared
PA/PB1	PA	411	425	15	STLTSKRALDLPEIG	0	0	1	1			Shared
PA/PB1	PA	431	445	15	VEHVGSERRKYFVNE	0	0	1	1			Shared
PA/PB1	PA	436	450	15	SERRKYFVNEINYCK	0	0	1	1			Shared
PA/PB1	PA	441	455	15	YFVNEINYCKASTVM	0	0	1	1			Shared
PA/PB1	PA	446	460	15	INYCKASTVMMKYVL	0	0	1	1			Shared
PA/PB1	PA	451	465	15	ASTVMMKYVLFHTSL	0	0	1	1			Shared
PA/PB1	PA	456	470	15	MKYVLFHTSLLNESN	0	0	1	1			Shared
PA/PB1	PA	461	475	15	FHTSLLNESNASMGK	0	0	1	1			Shared
PA/PB1	PA	466	480	15	LNESNASMGKYKVIP	0	0	1	1			Shared
PA/PB1	PA	486	500	15	VNEKGESFDMLYGLA	0	0	1	1			Shared
PA/PB1	PA	491	505	15	ESFDMLYGLAVKGQS	0	0	1	1			Shared
PA/PB1	PA	496	510	15	LYGLAVKGQSHLRGD	0	0	1	1			Shared
PA/PB1	PA	501	515	15	VKGQSHLRGDTDVVT	0	0	1	1			Shared
PA/PB1	PA	506	520	15	HLRGDTDVVTVVTFE	0	0	1	1			Shared
PA/PB1	PA	511	525	15	TDVVTVVTFEFSSTD	0	0	1	1			Shared
PA/PB1	PA	516	530	15	VVTFEFSSTDPRVDS	0	0	1	1			Shared
PA/PB1	PA	521	535	15	FSSTDPRVDSGKWPK	0	0	1	1			Shared
PA/PB1	PA	526	540	15	PRVDSGKWPKYTVFR	0	0	1	1			Shared
PA/PB1	PA	531	545	15	GKWPKYTVFRIGSLF	0	0	1	1			Shared
PA/PB1	PA	551	565	15	KSVYLYCRVNGTNKI	0	0	1	1			Shared
PA/PB1	PA	556	570	15	YCRVNGTNKIQMKWG	0	0	1	1			Shared
PA/PB1	PA	561	575	15	GTNKIQMKWGMEARR	0	0	1	1			Shared
PA/PB1	PA	566	580	15	QMKWGMEARRCLLQS	0	0	1	1			Shared
PA/PB1	PA	571	585	15	MEARRCLLQSMQQME	0	0	1	1			Shared
PA/PB1	PA	576	590	15	CLLQSMQQMEAIVEQ	0	0	1	1			Shared
PA/PB1	PA	581	595	15	MQQMEAIVEQESSIQ	0	0	1	1			Shared
PA/PB1	PA	586	600	15	AIVEQESSIQGYDMT	0	0	1	1			Shared
PA/PB1	PA	591	605	15	ESSIQGYDMTKACFK	0	0	1	1			Shared
PA/PB1	PA	596	610	15	GYDMTKACFKGDRVN	0	0	1	1			Shared
PA/PB1	PA	601	615	15	KACFKGDRVNSPKTF	0	0	1	1			Shared
PA/PB1	PA	606	620	15	GDRVNSPKTFSIGTQ	0	0	1	1			Shared
PA/PB1	PA	611	625	15	SPKTFSIGTQEGKLV	0	0	1	1			Shared
PA/PB1	PA	616	630	15	SIGTQEGKLVKGSFG	0	0	1	1			Shared
PA/PB1	PA	621	635	15	EGKLVKGSFGKALRV	0	0	1	1			Shared
PA/PB1	PA	626	640	15	KGSFGKALRVIFTKC	0	0	1	1			Shared
PA/PB1	PA	631	645	15	KALRVIFTKCLMHYV	0	0	1	1			Shared
PA/PB1	PA	636	650	15	IFTKCLMHYVFGNAQ	0	0	1	1			Shared
PA/PB1	PA	641	655	15	LMHYVFGNAQLEGFS	0	0	1	1			Shared
PA/PB1	PA	646	660	15	FGNAQLEGFSAESRR	0	0	1	1			Shared
PA/PB1	PA	651	665	15	LEGFSAESRRLLLLI	0	0	1	1			Shared
PA/PB1	PA	656	670	15	AESRRLLLLIQALKD	0	0	1	1			Shared
PA/PB1	PA	661	675	15	LLLLIQALKDRKGPW	0	0	1	1			Shared
PA/PB1	PA	666	680	15	QALKDRKGPWVFDLE	0	0	1	1			Shared
PA/PB1	PA	671	685	15	RKGPWVFDLEGMYSG	0	0	1	1			Shared
PA/PB1	PA	676	690	15	VFDLEGMYSGIEECI	0	0	1	1			Shared
PA/PB1	PA	681	695	15	GMYSGIEECISNNPW	0	0	1	1			Shared
PA/PB1	PA	701	715	15	YWFNEWLGFEKEGSK	0	0	1	1			Shared
PA/PB1	PA	706	720	15	WLGFEKEGSKVLESV	0	0	1	1			Shared
PA/PB1	PB1	16	30	15	AAISTTFPYTGVPPY	0	0	1	1			Shared
PA/PB1	PB1	21	35	15	TFPYTGVPPYSHGTG	0	0	1	1			Shared
PA/PB1	PB1	26	40	15	GVPPYSHGTGTGYTI	0	0	1	1			Shared
PA/PB1	PB1	31	45	15	SHGTGTGYTIDTVIR	0	0	1	1			Shared
PA/PB1	PB1	36	50	15	TGYTIDTVIRTHEYS	0	0	1	1			Shared
PA/PB1	PB1	41	55	15	DTVIRTHEYSNKGKQ	0	0	1	1			Shared
PA/PB1	PB1	71	85	15	GPLPEDNEPSAYAQL	0	0	1	1			Shared
PA/PB1	PB1	76	90	15	DNEPSAYAQLDCVLE	0	0	1	1			Shared
PA/PB1	PB1	81	95	15	AYAQLDCVLEALDRM	0	0	1	1			Shared
PA/PB1	PB1	86	100	15	DCVLEALDRMDEEHP	0	0	1	1			Shared
PA/PB1	PB1	91	105	15	ALDRMDEEHPGLFQA	0	0	1	1			Shared
PA/PB1	PB1	96	110	15	DEEHPGLFQAASQNA	0	0	1	1			Shared
PA/PB1	PB1	101	115	15	GLFQAASQNAMEALM	0	0	1	1			Shared
PA/PB1	PB1	106	120	15	ASQNAMEALMVTTVD	0	0	1	1			Shared
PA/PB1	PB1	111	125	15	MEALMVTTVDKLTQG	0	0	1	1			Shared
PA/PB1	PB1	116	130	15	VTTVDKLTQGRQTFD	0	0	1	1			Shared
PA/PB1	PB1	121	135	15	KLTQGRQTFDWTVCR	0	0	1	1			Shared
PA/PB1	PB1	126	140	15	RQTFDWTVCRNQPAA	0	0	1	1			Shared
PA/PB1	PB1	131	145	15	WTVCRNQPAATALNT	0	0	1	1			Shared
PA/PB1	PB1	136	150	15	NQPAATALNTTITSF	0	0	1	1			Shared
PA/PB1	PB1	141	155	15	TALNTTITSFRLNDL	0	0	1	1			Shared
PA/PB1	PB1	146	160	15	TITSFRLNDLNGADK	0	0	1	1			Shared
PA/PB1	PB1	181	195	15	FFSVKNIKKKLPAKN	0	0	1	1			Shared
PA/PB1	PB1	186	200	15	NIKKKLPAKNRKGFL	0	0	1	1			Shared
PA/PB1	PB1	191	205	15	LPAKNRKGFLIKRIP	0	0	1	1			Shared
PA/PB1	PB1	216	230	15	EYIKRALSLNTMTKD	0	0	1	1			Shared
PA/PB1	PB1	221	235	15	ALSLNTMTKDAERGK	0	0	1	1			Shared
PA/PB1	PB1	231	245	15	AERGKLKRRAIATAG	0	0	1	1			Shared
PA/PB1	PB1	236	250	15	LKRRAIATAGIQIRG	0	0	1	1			Shared
PA/PB1	PB1	241	255	15	IATAGIQIRGFVLVV	0	0	1	1			Shared
PA/PB1	PB1	246	260	15	IQIRGFVLVVENLAK	0	0	1	1			Shared
PA/PB1	PB1	251	265	15	FVLVVENLAKNICEN	0	0	1	1			Shared
PA/PB1	PB1	256	270	15	ENLAKNICENLEQSG	0	0	1	1			Shared
PA/PB1	PB1	261	275	15	NICENLEQSGLPVGG	0	0	1	1			Shared
PA/PB1	PB1	271	285	15	LPVGGNEKKAKLSNA	0	0	1	1			Shared
PA/PB1	PB1	276	290	15	NEKKAKLSNAVAKML	0	0	1	1			Shared
PA/PB1	PB1	281	295	15	KLSNAVAKMLSNCPP	0	0	1	1			Shared
PA/PB1	PB1	286	300	15	VAKMLSNCPPGGISM	0	0	1	1			Shared
PA/PB1	PB1	291	305	15	SNCPPGGISMTVTGD	0	0	1	1			Shared
PA/PB1	PB1	296	310	15	GGISMTVTGDNTKWN	0	0	1	1			Shared
PA/PB1	PB1	301	315	15	TVTGDNTKWNECLNP	0	0	1	1			Shared
PA/PB1	PB1	306	320	15	NTKWNECLNPRIFLA	0	0	1	1			Shared
PA/PB1	PB1	311	325	15	ECLNPRIFLAMTERI	0	0	1	1			Shared
PA/PB1	PB1	316	330	15	RIFLAMTERITRDSP	0	0	1	1			Shared
PA/PB1	PB1	351	365	15	LGKGFMITSKTKRLK	0	0	1	1			Shared
PA/PB1	PB1	356	370	15	MITSKTKRLKAQIPC	0	0	1	1			Shared
PA/PB1	PB1	361	375	15	TKRLKAQIPCPDLFS	0	0	1	1			Shared
PA/PB1	PB1	366	380	15	AQIPCPDLFSIPLER	0	0	1	1			Shared
PA/PB1	PA	6	20	15	RQCFNPMIVELAEKT	1	0	0	0
PA/PB1	PA	11	25	15	PMIVELAEKTMKEYG	1	0	0	0
PA/PB1	PA	16	30	15	LAEKTMKEYGEDLKI	1	0	0	0
PA/PB1	PA	51	65	15	FHFINEQGESIIVEL	1	0	0	0
PA/PB1	PA	56	70	15	EQGESIIVELGDPNA	1	0	0	0
PA/PB1	PA	61	75	15	IIVELGDPNALLKHR	1	0	0	0
PA/PB1	PA	66	80	15	GDPNALLKHRFEIIE	1	0	0	0
PA/PB1	PA	91	105	15	VNSICNTTGAEKPKF	1	0	0	0
PA/PB1	PA	96	110	15	NTTGAEKPKFLPDLY	1	0	0	0
PA/PB1	PA	101	115	15	EKPKFLPDLYDYKEN	1	0	0	0
PA/PB1	PA	131	145	15	YLEKANKIKSEKTHI	1	0	0	0
PA/PB1	PA	136	150	15	NKIKSEKTHIHIFSF	1	0	0	0
PA/PB1	PA	141	155	15	EKTHIHIFSFTGEEM	1	0	0	0
PA/PB1	PA	171	185	15	IKTRLFTIRQEMASR	1	0	0	0
PA/PB1	PA	176	190	15	FTIRQEMASRGLWDS	1	0	0	0
PA/PB1	PA	181	195	15	EMASRGLWDSFRQSE	1	0	0	0
PA/PB1	PA	191	205	15	FRQSERGEETIEERF	1	0	0	0
PA/PB1	PA	196	210	15	RGEETIEERFEITGT	1	0	0	0
PA/PB1	PA	201	215	15	IEERFEITGTMRKLA	1	0	0	0
PA/PB1	PA	206	220	15	EITGTMRKLADQSLP	1	0	0	0
PA/PB1	PA	211	225	15	MRKLADQSLPPNFSS	1	0	0	0
PA/PB1	PA	216	230	15	DQSLPPNFSSLENFR	1	0	0	0
PA/PB1	PA	221	235	15	PNFSSLENFRAYVDG	1	0	0	0
PA/PB1	PA	231	245	15	AYVDGFEPNGYIEGK	1	0	0	0
PA/PB1	PA	236	250	15	FEPNGYIEGKLSQMS	1	0	0	0
PA/PB1	PA	241	255	15	YIEGKLSQMSKEVNA	1	0	0	0
PA/PB1	PA	246	260	15	LSQMSKEVNARIEPF	1	0	0	0
PA/PB1	PA	251	265	15	KEVNARIEPFLKTTP	1	0	0	0
PA/PB1	PA	256	270	15	RIEPFLKTTPRPLRL	1	0	0	0
PA/PB1	PA	261	275	15	LKTTPRPLRLPNGPP	1	0	0	0
PA/PB1	PA	266	280	15	RPLRLPNGPPCSQRS	1	0	0	0
PA/PB1	PA	271	285	15	PNGPPCSQRSKFLLM	1	0	0	0
PA/PB1	PA	276	290	15	CSQRSKFLLMDALKL	1	0	0	0
PA/PB1	PA	301	315	15	GIPLYDAIKCMRTFF	1	0	0	0
PA/PB1	PA	306	320	15	DAIKCMRTFFGWKEP	1	0	0	0
PA/PB1	PA	311	325	15	MRTFFGWKEPNVVKP	1	0	0	0
PA/PB1	PA	316	330	15	GWKEPNVVKPHEKGI	1	0	0	0
PA/PB1	PA	321	335	15	NVVKPHEKGINPNYL	1	0	0	0
PA/PB1	PA	326	340	15	HEKGINPNYLLSWKQ	1	0	0	0
PA/PB1	PA	331	345	15	NPNYLLSWKQVLAEL	1	0	0	0
PA/PB1	PA	336	350	15	LSWKQVLAELQDIEN	1	0	0	0
PA/PB1	PA	341	355	15	VLAELQDIENEEKIP	1	0	0	0
PA/PB1	PA	346	360	15	QDIENEEKIPKTKNM	1	0	0	0
PA/PB1	PA	351	365	15	EEKIPKTKNMKKTSQ	1	0	0	0
PA/PB1	PA	356	370	15	KTKNMKKTSQLKWAL	1	0	0	0
PA/PB1	PA	371	385	15	GENMAPEKVDFDDCK	1	0	0	0
PA/PB1	PA	376	390	15	PEKVDFDDCKDVGDL	1	0	0	0
PA/PB1	PA	381	395	15	FDDCKDVGDLKQYDS	1	0	0	0
PA/PB1	PA	386	400	15	DVGDLKQYDSDEPEL	1	0	0	0
PA/PB1	PA	391	405	15	KQYDSDEPELRSLAS	1	0	0	0
PA/PB1	PA	396	410	15	DEPELRSLASWIQNE	1	0	0	0
PA/PB1	PA	401	415	15	RSLASWIQNEFNKAC	1	0	0	0
PA/PB1	PA	406	420	15	WIQNEFNKACELTDS	1	0	0	0
PA/PB1	PA	411	425	15	FNKACELTDSSWIEL	1	0	0	0
PA/PB1	PA	416	430	15	ELTDSSWIELDEIGE	1	0	0	0
PA/PB1	PA	421	435	15	SWIELDEIGEDVAPI	1	0	0	0
PA/PB1	PA	436	450	15	EHIASMRRNYFTSEV	1	0	0	0
PA/PB1	PA	441	455	15	MRRNYFTSEVSHCRA	1	0	0	0
PA/PB1	PA	446	460	15	FTSEVSHCRATEYIM	1	0	0	0
PA/PB1	PA	536	550	15	KWEKYCVLEIGDMLI	1	0	0	0
PA/PB1	PA	541	555	15	CVLEIGDMLIRSAIG	1	0	0	0
PA/PB1	PA	546	560	15	GDMLIRSAIGQVSRP	1	0	0	0
PA/PB1	PA	551	565	15	RSAIGQVSRPMFLYV	1	0	0	0
PA/PB1	PA	556	570	15	QVSRPMFLYVRTNGT	1	0	0	0
PA/PB1	PA	561	575	15	MFLYVRTNGTSKIKM	1	0	0	0
PA/PB1	PA	566	580	15	RTNGTSKIKMKWGME	1	0	0	0
PA/PB1	PA	571	585	15	SKIKMKWGMEMRRCL	1	0	0	0
PA/PB1	PA	606	620	15	DMTKEFFENKSETWP	1	0	0	0
PA/PB1	PA	611	625	15	FFENKSETWPIGESP	1	0	0	0
PA/PB1	PA	616	630	15	SETWPIGESPKGVEE	1	0	0	0
PA/PB1	PA	621	635	15	IGESPKGVEESSIGK	1	0	0	0
PA/PB1	PA	626	640	15	KGVEESSIGKVCRTL	1	0	0	0
PA/PB1	PA	631	645	15	SSIGKVCRTLLAKSV	1	0	0	0
PA/PB1	PA	661	675	15	ESRKLLLIVQALRDN	1	0	0	0
PA/PB1	PA	666	680	15	LLIVQALRDNLEPGT	1	0	0	0
PA/PB1	PA	671	685	15	ALRDNLEPGTFDLGG	1	0	0	0
PA/PB1	PA	706	716	11	WFNSFLTHALS	1	0	0	0
PA/PB1	PB1	1	15	15	MDVNPTLLFLKIPAQ	1	0	0	0
PA/PB1	PB1	6	20	15	TLLFLKIPAQNAIST	1	0	0	0
PA/PB1	PB1	11	25	15	KIPAQNAISTTFPYT	1	0	0	0
PA/PB1	PB1	41	55	15	DTVNRTHQYSEKGKW	1	0	0	0
PA/PB1	PB1	46	60	15	THQYSEKGKWTTNTE	1	0	0	0
PA/PB1	PB1	51	65	15	EKGKWTTNTETGAPQ	1	0	0	0
PA/PB1	PB1	101	115	15	GIFENSCLETMEVVQ	1	0	0	0
PA/PB1	PB1	106	120	15	SCLETMEVVQQTRVD	1	0	0	0
PA/PB1	PB1	111	125	15	MEVVQQTRVDRLTQG	1	0	0	0
PA/PB1	PB1	116	130	15	QTRVDRLTQGRQTYD	1	0	0	0
PA/PB1	PB1	121	135	15	RLTQGRQTYDWTLNR	1	0	0	0
PA/PB1	PB1	166	180	15	FLKDVMESMDKEEIE	1	0	0	0
PA/PB1	PB1	171	185	15	MESMDKEEIEITTHF	1	0	0	0
PA/PB1	PB1	176	190	15	KEEIEITTHFQRKRR	1	0	0	0
PA/PB1	PB1	206	220	15	GKKKQRVNKRSYLIR	1	0	0	0
PA/PB1	PB1	211	225	15	RVNKRSYLIRALTLN	1	0	0	0
PA/PB1	PB1	216	230	15	SYLIRALTLNTMTKD	1	0	0	0
PA/PB1	PA	6	20	15	RQCFNPMIVELAEKA	0	1	0	0
PA/PB1	PA	11	25	15	PMIVELAEKAMKEYG	0	1	0	0
PA/PB1	PA	16	30	15	LAEKAMKEYGEDLKI	0	1	0	0
PA/PB1	PA	51	65	15	FHFINEQGESIVVEL	0	1	0	0
PA/PB1	PA	56	70	15	EQGESIVVELDDPNA	0	1	0	0
PA/PB1	PA	61	75	15	IVVELDDPNALLKHR	0	1	0	0
PA/PB1	PA	66	80	15	DDPNALLKHRFEIIE	0	1	0	0
PA/PB1	PA	91	105	15	VNSICNTTGAGKPKF	0	1	0	0
PA/PB1	PA	96	110	15	NTTGAGKPKFLPDLY	0	1	0	0
PA/PB1	PA	101	115	15	GKPKFLPDLYDYKEN	0	1	0	0
PA/PB1	PA	131	145	15	YLEKANKIKSENTHI	0	1	0	0
PA/PB1	PA	136	150	15	NKIKSENTHIHIFSF	0	1	0	0
PA/PB1	PA	141	155	15	ENTHIHIFSFTGEEM	0	1	0	0
PA/PB1	PA	171	185	15	IKTRLFTIRQEMANR	0	1	0	0
PA/PB1	PA	176	190	15	FTIRQEMANRGLWDS	0	1	0	0
PA/PB1	PA	181	195	15	EMANRGLWDSFRQSE	0	1	0	0
PA/PB1	PA	191	205	15	FRQSERGEETIEEKF	0	1	0	0
PA/PB1	PA	196	210	15	RGEETIEEKFEITGT	0	1	0	0
PA/PB1	PA	201	215	15	IEEKFEITGTMRRLA	0	1	0	0
PA/PB1	PA	206	220	15	EITGTMRRLADQSLP	0	1	0	0
PA/PB1	PA	211	225	15	MRRLADQSLPPNFSC	0	1	0	0
PA/PB1	PA	216	230	15	DQSLPPNFSCLENFR	0	1	0	0
PA/PB1	PA	221	235	15	PNFSCLENFRAYVDG	0	1	0	0
PA/PB1	PA	231	245	15	AYVDGFEPNGCIEGK	0	1	0	0
PA/PB1	PA	236	250	15	FEPNGCIEGKLSQMS	0	1	0	0
PA/PB1	PA	241	255	15	CIEGKLSQMSKEVNA	0	1	0	0
PA/PB1	PA	246	260	15	LSQMSKEVNAQIEPF	0	1	0	0
PA/PB1	PA	251	265	15	KEVNAQIEPFLKTTP	0	1	0	0
PA/PB1	PA	256	270	15	QIEPFLKTTPRPIKL	0	1	0	0
PA/PB1	PA	261	275	15	LKTTPRPIKLPSGPP	0	1	0	0
PA/PB1	PA	266	280	15	RPIKLPSGPPCYQRS	0	1	0	0
PA/PB1	PA	271	285	15	PSGPPCYQRSKFLLM	0	1	0	0
PA/PB1	PA	276	290	15	CYQRSKFLLMDALKL	0	1	0	0
PA/PB1	PA	301	315	15	GIPLYDAIKCIKTFF	0	1	0	0
PA/PB1	PA	306	320	15	DAIKCIKTFFGWKEP	0	1	0	0
PA/PB1	PA	311	325	15	IKTFFGWKEPYIVKP	0	1	0	0
PA/PB1	PA	316	330	15	GWKEPYIVKPHEKGI	0	1	0	0
PA/PB1	PA	321	335	15	YIVKPHEKGINSNYL	0	1	0	0
PA/PB1	PA	326	340	15	HEKGINSNYLLSWKQ	0	1	0	0
PA/PB1	PA	331	345	15	NSNYLLSWKQVLSEL	0	1	0	0
PA/PB1	PA	336	350	15	LSWKQVLSELQDIEN	0	1	0	0
PA/PB1	PA	341	355	15	VLSELQDIENEEKIP	0	1	0	0
PA/PB1	PA	346	360	15	QDIENEEKIPRTKNM	0	1	0	0
PA/PB1	PA	351	365	15	EEKIPRTKNMKKTSQ	0	1	0	0
PA/PB1	PA	356	370	15	RTKNMKKTSQLKWAL	0	1	0	0
PA/PB1	PA	371	385	15	GENMAPEKVDFENCR	0	1	0	0
PA/PB1	PA	376	390	15	PEKVDFENCRDISDL	0	1	0	0
PA/PB1	PA	381	395	15	FENCRDISDLKQYDS	0	1	0	0
PA/PB1	PA	386	400	15	DISDLKQYDSEEPEL	0	1	0	0
PA/PB1	PA	391	405	15	KQYDSEEPELRSLSS	0	1	0	0
PA/PB1	PA	396	410	15	EEPELRSLSSWIQSE	0	1	0	0
PA/PB1	PA	401	415	15	RSLSSWIQSEFNKAC	0	1	0	0
PA/PB1	PA	406	420	15	WIQSEFNKACELTDS	0	1	0	0
PA/PB1	PA	411	425	15	FNKACELTDSVWIEL	0	1	0	0
PA/PB1	PA	416	430	15	ELTDSVWIELDEIGE	0	1	0	0
PA/PB1	PA	421	435	15	VWIELDEIGEDVAPI	0	1	0	0
PA/PB1	PA	436	450	15	EHIASMRRNYFTAEV	0	1	0	0
PA/PB1	PA	441	455	15	MRRNYFTAEVSHCRA	0	1	0	0
PA/PB1	PA	446	460	15	FTAEVSHCRATEYIM	0	1	0	0
PA/PB1	PA	536	550	15	KWEKYCVLEIGDMLL	0	1	0	0
PA/PB1	PA	541	555	15	CVLEIGDMLLRSAIG	0	1	0	0
PA/PB1	PA	546	560	15	GDMLLRSAIGQISRP	0	1	0	0
PA/PB1	PA	551	565	15	RSAIGQISRPMFLYV	0	1	0	0
PA/PB1	PA	556	570	15	QISRPMFLYVRTNGT	0	1	0	0
PA/PB1	PA	561	575	15	MFLYVRTNGTSKVKM	0	1	0	0
PA/PB1	PA	566	580	15	RTNGTSKVKMKWGME	0	1	0	0
PA/PB1	PA	571	585	15	SKVKMKWGMEMRRCL	0	1	0	0
PA/PB1	PA	606	620	15	DMTKEFFENKSEAWP	0	1	0	0
PA/PB1	PA	611	625	15	FFENKSEAWPIGESP	0	1	0	0
PA/PB1	PA	616	630	15	SEAWPIGESPKGVEE	0	1	0	0
PA/PB1	PA	621	635	15	IGESPKGVEEGSIGK	0	1	0	0
PA/PB1	PA	626	640	15	KGVEEGSIGKVCRTL	0	1	0	0
PA/PB1	PA	631	645	15	GSIGKVCRTLLAKSV	0	1	0	0
PA/PB1	PA	661	675	15	ESRKLLLIVQALRDK	0	1	0	0
PA/PB1	PA	666	680	15	LLIVQALRDKLEPGT	0	1	0	0
PA/PB1	PA	671	685	15	ALRDKLEPGTFDLGG	0	1	0	0
PA/PB1	PA	706	716	11	WFNSFLTHALK	0	1	0	0
PA/PB1	PB1	1	15	15	MDVNPTLLFLKVPAQ	0	1	0	0
PA/PB1	PB1	6	20	15	TLLFLKVPAQNAIST	0	1	0	0
PA/PB1	PB1	11	25	15	KVPAQNAISTTFPYT	0	1	0	0
PA/PB1	PB1	41	55	15	DTVNRTHQYSERGKW	0	1	0	0
PA/PB1	PB1	46	60	15	THQYSERGKWTTNTE	0	1	0	0
PA/PB1	PB1	51	65	15	ERGKWTTNTETGAPQ	0	1	0	0
PA/PB1	PB1	101	115	15	GIFENSCLETMEAVQ	0	1	0	0
PA/PB1	PB1	106	120	15	SCLETMEAVQQTRVD	0	1	0	0
PA/PB1	PB1	111	125	15	MEAVQQTRVDKLTQG	0	1	0	0
PA/PB1	PB1	116	130	15	QTRVDKLTQGRQTYD	0	1	0	0
PA/PB1	PB1	121	135	15	KLTQGRQTYDWTLNR	0	1	0	0
PA/PB1	PB1	166	180	15	FLKDVMESMDKEEME	0	1	0	0
PA/PB1	PB1	171	185	15	MESMDKEEMEITTHF	0	1	0	0
PA/PB1	PB1	176	190	15	KEEMEITTHFQRKRR	0	1	0	0
PA/PB1	PB1	206	220	15	GKKKQRVNKRGYLIR	0	1	0	0
PA/PB1	PB1	211	225	15	RVNKRGYLIRALTLN	0	1	0	0
PA/PB1	PB1	216	230	15	GYLIRALTLNTMTKD	0	1	0	0
PA/PB1	PA	191	205	15	IGEEDVEKGIDFKLG	0	0	1	0
PA/PB1	PA	196	210	15	VEKGIDFKLGQTISR	0	0	1	0
PA/PB1	PA	201	215	15	DFKLGQTISRLRDIS	0	0	1	0
PA/PB1	PA	246	260	15	MSPLVSVTPKKLTWE	0	0	1	0
PA/PB1	PA	251	265	15	SVTPKKLTWEDLRPI	0	0	1	0
PA/PB1	PA	256	270	15	KLTWEDLRPIGPHIY	0	0	1	0
PA/PB1	PA	261	275	15	DLRPIGPHIYDHELP	0	0	1	0
PA/PB1	PA	266	280	15	GPHIYDHELPEVPYN	0	0	1	0
PA/PB1	PA	271	285	15	DHELPEVPYNAFLLM	0	0	1	0
PA/PB1	PA	341	355	15	RDCVNTISNEEASNE	0	0	1	0
PA/PB1	PA	346	360	15	TISNEEASNELQKTN	0	0	1	0
PA/PB1	PA	351	365	15	EASNELQKTNYAKWA	0	0	1	0
PA/PB1	PA	416	430	15	KRALDLPEIGPDIAP	0	0	1	0
PA/PB1	PA	421	435	15	LPEIGPDIAPVEHVG	0	0	1	0
PA/PB1	PA	426	440	15	PDIAPVEHVGSERRK	0	0	1	0
PA/PB1	PA	471	485	15	ASMGKYKVIPITNRV	0	0	1	0
PA/PB1	PA	476	490	15	YKVIPITNRVVNEKG	0	0	1	0
PA/PB1	PA	481	495	15	ITNRVVNEKGESFDM	0	0	1	0
PA/PB1	PA	536	550	15	YTVFRIGSLFVSGRE	0	0	1	0
PA/PB1	PA	541	555	15	IGSLFVSGREKSVYL	0	0	1	0
PA/PB1	PA	546	560	15	VSGREKSVYLYCRVN	0	0	1	0
PA/PB1	PA	686	700	15	IEECISNNPWVIQSV	0	0	1	0
PA/PB1	PA	691	705	15	SNNPWVIQSVYWFNE	0	0	1	0
PA/PB1	PA	696	710	15	VIQSVYWFNEWLGFE	0	0	1	0
PA/PB1	PA	711	725	15	KEGSKVLESVDEVMD	0	0	1	0
PA/PB1	PA	716	726	11	VLESVDEVMDE	0	0	1	0
PA/PB1	PB1	1	15	15	MNINPYFLFIDVPVQ	0	0	1	0
PA/PB1	PB1	6	20	15	YFLFIDVPVQAAIST	0	0	1	0
PA/PB1	PB1	11	25	15	DVPVQAAISTTFPYT	0	0	1	0
PA/PB1	PB1	46	60	15	THEYSNKGKQYISDV	0	0	1	0
PA/PB1	PB1	51	65	15	NKGKQYISDVTGCTM	0	0	1	0
PA/PB1	PB1	56	70	15	YISDVTGCTMVDPIN	0	0	1	0
PA/PB1	PB1	61	75	15	TGCTMVDPINGPLPE	0	0	1	0
PA/PB1	PB1	66	80	15	VDPINGPLPEDNEPS	0	0	1	0
PA/PB1	PB1	151	165	15	RLNDLNGADKGGLIP	0	0	1	0
PA/PB1	PB1	156	170	15	NGADKGGLIPFCQDI	0	0	1	0
PA/PB1	PB1	161	175	15	GGLIPFCQDIIDSLD	0	0	1	0
PA/PB1	PB1	166	180	15	FCQDIIDSLDRPEMT	0	0	1	0
PA/PB1	PB1	171	185	15	IDSLDRPEMTFFSVK	0	0	1	0
PA/PB1	PB1	176	190	15	RPEMTFFSVKNIKKK	0	0	1	0
PA/PB1	PB1	196	210	15	RKGFLIKRIPMKIKD	0	0	1	0
PA/PB1	PB1	201	215	15	IKRIPMKIKDKITKV	0	0	1	0
PA/PB1	PB1	206	220	15	MKIKDKITKVEYIKR	0	0	1	0
PA/PB1	PB1	211	225	15	KITKVEYIKRALSLN	0	0	1	0
PA/PB1	PB1	321	335	15	MTERITRDSPVWFRD	0	0	1	0
PA/PB1	PB1	326	340	15	TRDSPVWFRDFCSIA	0	0	1	0
PA/PB1	PB1	331	345	15	VWFRDFCSIAPVLFS	0	0	1	0
PA/PB1	PB1	336	350	15	FCSIAPVLFSNKMAR	0	0	1	0
PA/PB1	PB1	341	355	15	PVLFSNKMARLGKGF	0	0	1	0
PA/PB1	PB1	346	360	15	NKMARLGKGFMITSK	0	0	1	0
PA/PB1	PA	191	205	15	IGEEDVEKGIDFRLG	0	0	0	1
PA/PB1	PA	196	210	15	VEKGIDFRLGQTISR	0	0	0	1
PA/PB1	PA	201	215	15	DFRLGQTISRLRDIS	0	0	0	1
PA/PB1	PA	246	260	15	MSPLVSVTPKKLKWE	0	0	0	1
PA/PB1	PA	251	265	15	SVTPKKLKWEDLRPI	0	0	0	1
PA/PB1	PA	256	270	15	KLKWEDLRPIGPHIY	0	0	0	1
PA/PB1	PA	261	275	15	DLRPIGPHIYNHELP	0	0	0	1
PA/PB1	PA	266	280	15	GPHIYNHELPEVPYN	0	0	0	1
PA/PB1	PA	271	285	15	NHELPEVPYNAFLLM	0	0	0	1
PA/PB1	PA	341	355	15	RDCVNTISNEEMSNE	0	0	0	1
PA/PB1	PA	346	360	15	TISNEEMSNELQKTN	0	0	0	1
PA/PB1	PA	351	365	15	EMSNELQKTNYAKWA	0	0	0	1
PA/PB1	PA	416	430	15	KRALDLPEIGPDAAP	0	0	0	1
PA/PB1	PA	421	435	15	LPEIGPDAAPVEHVG	0	0	0	1
PA/PB1	PA	426	440	15	PDAAPVEHVGSERRK	0	0	0	1
PA/PB1	PA	471	485	15	ASMGKYKVIPITNRI	0	0	0	1
PA/PB1	PA	476	490	15	YKVIPITNRIVNEKG	0	0	0	1
PA/PB1	PA	481	495	15	ITNRIVNEKGESFDM	0	0	0	1
PA/PB1	PA	536	550	15	YTVFRIGSLFVGGRE	0	0	0	1
PA/PB1	PA	541	555	15	IGSLFVGGREKSVYL	0	0	0	1
PA/PB1	PA	546	560	15	VGGREKSVYLYCRVN	0	0	0	1
PA/PB1	PA	686	700	15	IEECISNNPWVIQSA	0	0	0	1
PA/PB1	PA	691	705	15	SNNPWVIQSAYWFNE	0	0	0	1
PA/PB1	PA	696	710	15	VIQSAYWFNEWLGFE	0	0	0	1
PA/PB1	PA	711	725	15	KEGSKVLESVDEIMD	0	0	0	1
PA/PB1	PA	716	726	11	VLESVDEIMDE	0	0	0	1
PA/PB1	PB1	1	15	15	MNINPYFLFIDVPIQ	0	0	0	1
PA/PB1	PB1	6	20	15	YFLFIDVPIQAAIST	0	0	0	1
PA/PB1	PB1	11	25	15	DVPIQAAISTTFPYT	0	0	0	1
PA/PB1	PB1	46	60	15	THEYSNKGKQYVSDI	0	0	0	1
PA/PB1	PB1	51	65	15	NKGKQYVSDITGCTM	0	0	0	1
PA/PB1	PB1	56	70	15	YVSDITGCTMIDPTN	0	0	0	1
PA/PB1	PB1	61	75	15	TGCTMIDPTNGPLPE	0	0	0	1
PA/PB1	PB1	66	80	15	IDPTNGPLPEDNEPS	0	0	0	1
PA/PB1	PB1	151	165	15	RLNDLNGADKGGLVP	0	0	0	1
PA/PB1	PB1	156	170	15	NGADKGGLVPFCQDI	0	0	0	1
PA/PB1	PB1	161	175	15	GGLVPFCQDIIDSLD	0	0	0	1
PA/PB1	PB1	166	180	15	FCQDIIDSLDKPEMT	0	0	0	1
PA/PB1	PB1	171	185	15	IDSLDKPEMTFFSVK	0	0	0	1
PA/PB1	PB1	176	190	15	KPEMTFFSVKNIKKK	0	0	0	1
PA/PB1	PB1	196	210	15	RKGFLIKRIPMKVKD	0	0	0	1
PA/PB1	PB1	201	215	15	IKRIPMKVKDRISRV	0	0	0	1
PA/PB1	PB1	206	220	15	MKVKDRISRVEYIKR	0	0	0	1
PA/PB1	PB1	211	225	15	RISRVEYIKRALSLN	0	0	0	1
PA/PB1	PB1	321	335	15	MTERITRDSPIWFRD	0	0	0	1
PA/PB1	PB1	326	340	15	TRDSPIWFRDFCSIA	0	0	0	1
PA/PB1	PB1	331	345	15	IWFRDFCSIAPVLFS	0	0	0	1
PA/PB1	PB1	336	350	15	FCSIAPVLFSNKIAR	0	0	0	1
PA/PB1	PB1	341	355	15	PVLFSNKIARLGKGF	0	0	0	1
PA/PB1	PB1	346	360	15	NKIARLGKGFMITSK	0	0	0	1

## Sheet: PB1-PB2
Supplementary Table S3. Composition of the Human Influenza A and B viruses homologs of PB1/PB2 epitopes.
MP	Protein	start	End	Length	Sequence	A/H1N1	A/H3N2	B/IOWA	B/SING	ALL	A	B
PB1/PB2	PB1	371	385	15	EMLASIDLKYFNEST	1	1	0	0		Shared
PB1/PB2	PB1	376	390	15	IDLKYFNESTRKKIE	1	1	0	0		Shared
PB1/PB2	PB1	381	395	15	FNESTRKKIEKIRPL	1	1	0	0		Shared
PB1/PB2	PB1	386	400	15	RKKIEKIRPLLIDGT	1	1	0	0		Shared
PB1/PB2	PB1	391	405	15	KIRPLLIDGTASLSP	1	1	0	0		Shared
PB1/PB2	PB1	396	410	15	LIDGTASLSPGMMMG	1	1	0	0		Shared
PB1/PB2	PB1	401	415	15	ASLSPGMMMGMFNML	1	1	0	0		Shared
PB1/PB2	PB1	406	420	15	GMMMGMFNMLSTVLG	1	1	0	0		Shared
PB1/PB2	PB1	411	425	15	MFNMLSTVLGVSILN	1	1	0	0		Shared
PB1/PB2	PB1	416	430	15	STVLGVSILNLGQKK	1	1	0	0		Shared
PB1/PB2	PB1	421	435	15	VSILNLGQKKYTKTT	1	1	0	0		Shared
PB1/PB2	PB1	426	440	15	LGQKKYTKTTYWWDG	1	1	0	0		Shared
PB1/PB2	PB1	431	445	15	YTKTTYWWDGLQSSD	1	1	0	0		Shared
PB1/PB2	PB1	436	450	15	YWWDGLQSSDDFALI	1	1	0	0		Shared
PB1/PB2	PB1	441	455	15	LQSSDDFALIVNAPN	1	1	0	0		Shared
PB1/PB2	PB1	446	460	15	DFALIVNAPNHEGIQ	1	1	0	0		Shared
PB1/PB2	PB1	451	465	15	VNAPNHEGIQAGVDR	1	1	0	0		Shared
PB1/PB2	PB1	456	470	15	HEGIQAGVDRFYRTC	1	1	0	0		Shared
PB1/PB2	PB1	461	475	15	AGVDRFYRTCKLVGI	1	1	0	0		Shared
PB1/PB2	PB1	466	480	15	FYRTCKLVGINMSKK	1	1	0	0		Shared
PB1/PB2	PB1	471	485	15	KLVGINMSKKKSYIN	1	1	0	0		Shared
PB1/PB2	PB1	491	505	15	EFTSFFYRYGFVANF	1	1	0	0		Shared
PB1/PB2	PB1	496	510	15	FYRYGFVANFSMELP	1	1	0	0		Shared
PB1/PB2	PB1	501	515	15	FVANFSMELPSFGVS	1	1	0	0		Shared
PB1/PB2	PB1	506	520	15	SMELPSFGVSGINES	1	1	0	0		Shared
PB1/PB2	PB1	511	525	15	SFGVSGINESADMSI	1	1	0	0		Shared
PB1/PB2	PB1	516	530	15	GINESADMSIGVTVI	1	1	0	0		Shared
PB1/PB2	PB1	521	535	15	ADMSIGVTVIKNNMI	1	1	0	0		Shared
PB1/PB2	PB1	526	540	15	GVTVIKNNMINNDLG	1	1	0	0		Shared
PB1/PB2	PB1	531	545	15	KNNMINNDLGPATAQ	1	1	0	0		Shared
PB1/PB2	PB1	536	550	15	NNDLGPATAQMALQL	1	1	0	0		Shared
PB1/PB2	PB1	541	555	15	PATAQMALQLFIKDY	1	1	0	0		Shared
PB1/PB2	PB1	546	560	15	MALQLFIKDYRYTYR	1	1	0	0		Shared
PB1/PB2	PB1	551	565	15	FIKDYRYTYRCHRGD	1	1	0	0		Shared
PB1/PB2	PB1	556	570	15	RYTYRCHRGDTQIQT	1	1	0	0		Shared
PB1/PB2	PB1	561	575	15	CHRGDTQIQTRRSFE	1	1	0	0		Shared
PB1/PB2	PB1	591	605	15	VSDGGPNLYNIRNLH	1	1	0	0		Shared
PB1/PB2	PB1	596	610	15	PNLYNIRNLHIPEVC	1	1	0	0		Shared
PB1/PB2	PB1	601	615	15	IRNLHIPEVCLKWEL	1	1	0	0		Shared
PB1/PB2	PB1	626	640	15	NPLNPFVSHKEIESV	1	1	0	0		Shared
PB1/PB2	PB1	631	645	15	FVSHKEIESVNNAVV	1	1	0	0		Shared
PB1/PB2	PB1	636	650	15	EIESVNNAVVMPAHG	1	1	0	0		Shared
PB1/PB2	PB1	641	655	15	NNAVVMPAHGPAKSM	1	1	0	0		Shared
PB1/PB2	PB1	646	660	15	MPAHGPAKSMEYDAV	1	1	0	0		Shared
PB1/PB2	PB1	651	665	15	PAKSMEYDAVATTHS	1	1	0	0		Shared
PB1/PB2	PB1	656	670	15	EYDAVATTHSWIPKR	1	1	0	0		Shared
PB1/PB2	PB1	661	675	15	ATTHSWIPKRNRSIL	1	1	0	0		Shared
PB1/PB2	PB1	666	680	15	WIPKRNRSILNTSQR	1	1	0	0		Shared
PB1/PB2	PB1	671	685	15	NRSILNTSQRGILED	1	1	0	0		Shared
PB1/PB2	PB1	676	690	15	NTSQRGILEDEQMYQ	1	1	0	0		Shared
PB1/PB2	PB1	681	695	15	GILEDEQMYQKCCNL	1	1	0	0		Shared
PB1/PB2	PB1	686	700	15	EQMYQKCCNLFEKFF	1	1	0	0		Shared
PB1/PB2	PB1	691	705	15	KCCNLFEKFFPSSSY	1	1	0	0		Shared
PB1/PB2	PB1	711	725	15	ISSMVEAMVSRARID	1	1	0	0		Shared
PB1/PB2	PB1	716	730	15	EAMVSRARIDARIDF	1	1	0	0		Shared
PB1/PB2	PB1	721	735	15	RARIDARIDFESGRI	1	1	0	0		Shared
PB1/PB2	PB1	726	740	15	ARIDFESGRIKKEEF	1	1	0	0		Shared
PB1/PB2	PB1	731	745	15	ESGRIKKEEFSEIMK	1	1	0	0		Shared
PB1/PB2	PB1	736	750	15	KKEEFSEIMKICSTI	1	1	0	0		Shared
PB1/PB2	PB1	741	755	15	SEIMKICSTIEELRR	1	1	0	0		Shared
PB1/PB2	PB2	1	15	15	MERIKELRNLMSQSR	1	1	0	0		Shared
PB1/PB2	PB2	6	20	15	ELRNLMSQSRTREIL	1	1	0	0		Shared
PB1/PB2	PB2	11	25	15	MSQSRTREILTKTTV	1	1	0	0		Shared
PB1/PB2	PB2	16	30	15	TREILTKTTVDHMAI	1	1	0	0		Shared
PB1/PB2	PB2	21	35	15	TKTTVDHMAIIKKYT	1	1	0	0		Shared
PB1/PB2	PB2	26	40	15	DHMAIIKKYTSGRQE	1	1	0	0		Shared
PB1/PB2	PB2	46	60	15	RMKWMMAMKYPITAD	1	1	0	0		Shared
PB1/PB2	PB2	51	65	15	MAMKYPITADKRITE	1	1	0	0		Shared
PB1/PB2	PB2	86	100	15	SDRVMVSPLAVTWWN	1	1	0	0		Shared
PB1/PB2	PB2	126	140	15	KHGTFGPVHFRNQVK	1	1	0	0		Shared
PB1/PB2	PB2	131	145	15	GPVHFRNQVKIRRRV	1	1	0	0		Shared
PB1/PB2	PB2	136	150	15	RNQVKIRRRVDINPG	1	1	0	0		Shared
PB1/PB2	PB2	141	155	15	IRRRVDINPGHADLS	1	1	0	0		Shared
PB1/PB2	PB2	146	160	15	DINPGHADLSAKEAQ	1	1	0	0		Shared
PB1/PB2	PB2	151	165	15	HADLSAKEAQDVIME	1	1	0	0		Shared
PB1/PB2	PB2	156	170	15	AKEAQDVIMEVVFPN	1	1	0	0		Shared
PB1/PB2	PB2	161	175	15	DVIMEVVFPNEVGAR	1	1	0	0		Shared
PB1/PB2	PB2	166	180	15	VVFPNEVGARILTSE	1	1	0	0		Shared
PB1/PB2	PB2	171	185	15	EVGARILTSESQLTI	1	1	0	0		Shared
PB1/PB2	PB2	176	190	15	ILTSESQLTITKEKK	1	1	0	0		Shared
PB1/PB2	PB2	196	210	15	CKISPLMVAYMLERE	1	1	0	0		Shared
PB1/PB2	PB2	201	215	15	LMVAYMLERELVRKT	1	1	0	0		Shared
PB1/PB2	PB2	206	220	15	MLERELVRKTRFLPV	1	1	0	0		Shared
PB1/PB2	PB2	211	225	15	LVRKTRFLPVAGGTS	1	1	0	0		Shared
PB1/PB2	PB2	231	245	15	VLHLTQGTCWEQMYT	1	1	0	0		Shared
PB1/PB2	PB2	251	265	15	RNDDVDQSLIIAARN	1	1	0	0		Shared
PB1/PB2	PB2	256	270	15	DQSLIIAARNIVRRA	1	1	0	0		Shared
PB1/PB2	PB2	261	275	15	IAARNIVRRAAVSAD	1	1	0	0		Shared
PB1/PB2	PB2	266	280	15	IVRRAAVSADPLASL	1	1	0	0		Shared
PB1/PB2	PB2	271	285	15	AVSADPLASLLEMCH	1	1	0	0		Shared
PB1/PB2	PB2	276	290	15	PLASLLEMCHSTQIG	1	1	0	0		Shared
PB1/PB2	PB2	301	315	15	NPTEEQAVDICKAAM	1	1	0	0		Shared
PB1/PB2	PB2	306	320	15	QAVDICKAAMGLRIS	1	1	0	0		Shared
PB1/PB2	PB2	311	325	15	CKAAMGLRISSSFSF	1	1	0	0		Shared
PB1/PB2	PB2	316	330	15	GLRISSSFSFGGFTF	1	1	0	0		Shared
PB1/PB2	PB2	321	335	15	SSFSFGGFTFKRTSG	1	1	0	0		Shared
PB1/PB2	PB2	386	400	15	VSGRDEQSIAEAIIV	1	1	0	0		Shared
PB1/PB2	PB2	391	405	15	EQSIAEAIIVAMVFS	1	1	0	0		Shared
PB1/PB2	PB2	396	410	15	EAIIVAMVFSQEDCM	1	1	0	0		Shared
PB1/PB2	PB2	401	415	15	AMVFSQEDCMIKAVR	1	1	0	0		Shared
PB1/PB2	PB2	406	420	15	QEDCMIKAVRGDLNF	1	1	0	0		Shared
PB1/PB2	PB2	411	425	15	IKAVRGDLNFVNRAN	1	1	0	0		Shared
PB1/PB2	PB2	416	430	15	GDLNFVNRANQRLNP	1	1	0	0		Shared
PB1/PB2	PB2	421	435	15	VNRANQRLNPMHQLL	1	1	0	0		Shared
PB1/PB2	PB2	426	440	15	QRLNPMHQLLRHFQK	1	1	0	0		Shared
PB1/PB2	PB2	431	445	15	MHQLLRHFQKDAKVL	1	1	0	0		Shared
PB1/PB2	PB2	436	450	15	RHFQKDAKVLFQNWG	1	1	0	0		Shared
PB1/PB2	PB2	481	495	15	SKMGVDEYSSTERVV	1	1	0	0		Shared
PB1/PB2	PB2	486	500	15	DEYSSTERVVVSIDR	1	1	0	0		Shared
PB1/PB2	PB2	506	520	15	DQRGNVLLSPEEVSE	1	1	0	0		Shared
PB1/PB2	PB2	511	525	15	VLLSPEEVSETQGTE	1	1	0	0		Shared
PB1/PB2	PB2	531	545	15	YSSSMMWEINGPESV	1	1	0	0		Shared
PB1/PB2	PB2	536	550	15	MWEINGPESVLVNTY	1	1	0	0		Shared
PB1/PB2	PB2	541	555	15	GPESVLVNTYQWIIR	1	1	0	0		Shared
PB1/PB2	PB2	571	585	15	LYNKMEFEPFQSLVP	1	1	0	0		Shared
PB1/PB2	PB2	591	605	15	QYSGFVRTLFQQMRD	1	1	0	0		Shared
PB1/PB2	PB2	596	610	15	VRTLFQQMRDVLGTF	1	1	0	0		Shared
PB1/PB2	PB2	601	615	15	QQMRDVLGTFDTAQI	1	1	0	0		Shared
PB1/PB2	PB2	606	620	15	VLGTFDTAQIIKLLP	1	1	0	0		Shared
PB1/PB2	PB2	611	625	15	DTAQIIKLLPFAAAP	1	1	0	0		Shared
PB1/PB2	PB2	616	630	15	IKLLPFAAAPPKQSR	1	1	0	0		Shared
PB1/PB2	PB2	621	635	15	FAAAPPKQSRMQFSS	1	1	0	0		Shared
PB1/PB2	PB2	641	655	15	RGSGMRILVRGNSPV	1	1	0	0		Shared
PB1/PB2	PB2	646	660	15	RILVRGNSPVFNYNK	1	1	0	0		Shared
PB1/PB2	PB2	706	720	15	PALSINELSNLAKGE	1	1	0	0		Shared
PB1/PB2	PB2	711	725	15	NELSNLAKGEKANVL	1	1	0	0		Shared
PB1/PB2	PB2	716	730	15	LAKGEKANVLIGQGD	1	1	0	0		Shared
PB1/PB2	PB2	721	735	15	KANVLIGQGDVVLVM	1	1	0	0		Shared
PB1/PB2	PB2	726	740	15	IGQGDVVLVMKRKRD	1	1	0	0		Shared
PB1/PB2	PB2	731	745	15	VVLVMKRKRDSSILT	1	1	0	0		Shared
PB1/PB2	PB2	736	750	15	KRKRDSSILTDSQTA	1	1	0	0		Shared
PB1/PB2	PB2	741	755	15	SSILTDSQTATKRIR	1	1	0	0		Shared
PB1/PB2	PB2	746	759	14	DSQTATKRIRMAIN	1	1	0	0		Shared
PB1/PB2	PB1	371	385	15	PDLFSIPLERYNEET	0	0	1	1			Shared
PB1/PB2	PB1	376	390	15	IPLERYNEETRAKLK	0	0	1	1			Shared
PB1/PB2	PB1	396	410	15	FNEEGTASLSPGMMM	0	0	1	1			Shared
PB1/PB2	PB1	401	415	15	TASLSPGMMMGMFNM	0	0	1	1			Shared
PB1/PB2	PB1	406	420	15	PGMMMGMFNMLSTVL	0	0	1	1			Shared
PB1/PB2	PB1	411	425	15	GMFNMLSTVLGVAAL	0	0	1	1			Shared
PB1/PB2	PB1	416	430	15	LSTVLGVAALGIKNI	0	0	1	1			Shared
PB1/PB2	PB1	421	435	15	GVAALGIKNIGNKEY	0	0	1	1			Shared
PB1/PB2	PB1	426	440	15	GIKNIGNKEYLWDGL	0	0	1	1			Shared
PB1/PB2	PB1	431	445	15	GNKEYLWDGLQSSDD	0	0	1	1			Shared
PB1/PB2	PB1	436	450	15	LWDGLQSSDDFALFV	0	0	1	1			Shared
PB1/PB2	PB1	441	455	15	QSSDDFALFVNAKDE	0	0	1	1			Shared
PB1/PB2	PB1	446	460	15	FALFVNAKDEETCME	0	0	1	1			Shared
PB1/PB2	PB1	451	465	15	NAKDEETCMEGINDF	0	0	1	1			Shared
PB1/PB2	PB1	456	470	15	ETCMEGINDFYRTCK	0	0	1	1			Shared
PB1/PB2	PB1	461	475	15	GINDFYRTCKLLGIN	0	0	1	1			Shared
PB1/PB2	PB1	466	480	15	YRTCKLLGINMSKKK	0	0	1	1			Shared
PB1/PB2	PB1	471	485	15	LLGINMSKKKSYCNE	0	0	1	1			Shared
PB1/PB2	PB1	476	490	15	MSKKKSYCNETGMFE	0	0	1	1			Shared
PB1/PB2	PB1	481	495	15	SYCNETGMFEFTSMF	0	0	1	1			Shared
PB1/PB2	PB1	486	500	15	TGMFEFTSMFYRDGF	0	0	1	1			Shared
PB1/PB2	PB1	491	505	15	FTSMFYRDGFVSNFA	0	0	1	1			Shared
PB1/PB2	PB1	511	525	15	FGVAGVNESADMAIG	0	0	1	1			Shared
PB1/PB2	PB1	516	530	15	VNESADMAIGMTIIK	0	0	1	1			Shared
PB1/PB2	PB1	521	535	15	DMAIGMTIIKNNMIN	0	0	1	1			Shared
PB1/PB2	PB1	526	540	15	MTIIKNNMINNGMGP	0	0	1	1			Shared
PB1/PB2	PB1	531	545	15	NNMINNGMGPATAQT	0	0	1	1			Shared
PB1/PB2	PB1	536	550	15	NGMGPATAQTAIQLF	0	0	1	1			Shared
PB1/PB2	PB1	541	555	15	ATAQTAIQLFIADYR	0	0	1	1			Shared
PB1/PB2	PB1	546	560	15	AIQLFIADYRYTYKC	0	0	1	1			Shared
PB1/PB2	PB1	551	565	15	IADYRYTYKCHRGDS	0	0	1	1			Shared
PB1/PB2	PB1	556	570	15	YTYKCHRGDSKVEGK	0	0	1	1			Shared
PB1/PB2	PB1	561	575	15	HRGDSKVEGKRMKII	0	0	1	1			Shared
PB1/PB2	PB1	566	580	15	KVEGKRMKIIKELWE	0	0	1	1			Shared
PB1/PB2	PB1	571	585	15	RMKIIKELWENTKGR	0	0	1	1			Shared
PB1/PB2	PB1	576	590	15	KELWENTKGRDGLLV	0	0	1	1			Shared
PB1/PB2	PB1	581	595	15	NTKGRDGLLVADGGP	0	0	1	1			Shared
PB1/PB2	PB1	586	600	15	DGLLVADGGPNIYNL	0	0	1	1			Shared
PB1/PB2	PB1	591	605	15	ADGGPNIYNLRNLHI	0	0	1	1			Shared
PB1/PB2	PB1	596	610	15	NIYNLRNLHIPEIVL	0	0	1	1			Shared
PB1/PB2	PB1	601	615	15	RNLHIPEIVLKYNLM	0	0	1	1			Shared
PB1/PB2	PB1	621	635	15	GRLLHPQNPFVGHLS	0	0	1	1			Shared
PB1/PB2	PB1	626	640	15	PQNPFVGHLSIEGIK	0	0	1	1			Shared
PB1/PB2	PB1	631	645	15	VGHLSIEGIKEADIT	0	0	1	1			Shared
PB1/PB2	PB1	636	650	15	IEGIKEADITPAHGP	0	0	1	1			Shared
PB1/PB2	PB1	656	670	15	YDAVSGTHSWRTKRN	0	0	1	1			Shared
PB1/PB2	PB1	661	675	15	GTHSWRTKRNRSILN	0	0	1	1			Shared
PB1/PB2	PB1	666	680	15	RTKRNRSILNTDQRN	0	0	1	1			Shared
PB1/PB2	PB1	671	685	15	RSILNTDQRNMILEE	0	0	1	1			Shared
PB1/PB2	PB1	676	690	15	TDQRNMILEEQCYAK	0	0	1	1			Shared
PB1/PB2	PB1	681	695	15	MILEEQCYAKCCNLF	0	0	1	1			Shared
PB1/PB2	PB1	686	700	15	QCYAKCCNLFEACFN	0	0	1	1			Shared
PB1/PB2	PB1	691	705	15	CCNLFEACFNSASYR	0	0	1	1			Shared
PB1/PB2	PB1	696	710	15	EACFNSASYRKPVGQ	0	0	1	1			Shared
PB1/PB2	PB1	701	715	15	SASYRKPVGQHSMLE	0	0	1	1			Shared
PB1/PB2	PB1	706	720	15	KPVGQHSMLEAMAHR	0	0	1	1			Shared
PB1/PB2	PB1	711	725	15	HSMLEAMAHRLRMDA	0	0	1	1			Shared
PB1/PB2	PB1	716	730	15	AMAHRLRMDARLDYE	0	0	1	1			Shared
PB1/PB2	PB1	721	735	15	LRMDARLDYESGRMS	0	0	1	1			Shared
PB1/PB2	PB1	726	740	15	RLDYESGRMSKDDFE	0	0	1	1			Shared
PB1/PB2	PB1	731	745	15	SGRMSKDDFEKAMAH	0	0	1	1			Shared
PB1/PB2	PB1	736	750	15	KDDFEKAMAHLGEIG	0	0	1	1			Shared
PB1/PB2	PB2	1	15	15	MTLAKIELLKQLLRD	0	0	1	1			Shared
PB1/PB2	PB2	6	20	15	IELLKQLLRDNEAKT	0	0	1	1			Shared
PB1/PB2	PB2	11	25	15	QLLRDNEAKTVLKQT	0	0	1	1			Shared
PB1/PB2	PB2	16	30	15	NEAKTVLKQTTVDQY	0	0	1	1			Shared
PB1/PB2	PB2	21	35	15	VLKQTTVDQYNIIRK	0	0	1	1			Shared
PB1/PB2	PB2	26	40	15	TVDQYNIIRKFNTSR	0	0	1	1			Shared
PB1/PB2	PB2	31	45	15	NIIRKFNTSRIEKNP	0	0	1	1			Shared
PB1/PB2	PB2	36	50	15	FNTSRIEKNPSLRMK	0	0	1	1			Shared
PB1/PB2	PB2	41	55	15	IEKNPSLRMKWAMCS	0	0	1	1			Shared
PB1/PB2	PB2	46	60	15	SLRMKWAMCSNFPLA	0	0	1	1			Shared
PB1/PB2	PB2	51	65	15	WAMCSNFPLALTKGD	0	0	1	1			Shared
PB1/PB2	PB2	56	70	15	NFPLALTKGDMANRI	0	0	1	1			Shared
PB1/PB2	PB2	61	75	15	LTKGDMANRIPLEYK	0	0	1	1			Shared
PB1/PB2	PB2	66	80	15	MANRIPLEYKGIQLK	0	0	1	1			Shared
PB1/PB2	PB2	71	85	15	PLEYKGIQLKTNAED	0	0	1	1			Shared
PB1/PB2	PB2	76	90	15	GIQLKTNAEDIGTKG	0	0	1	1			Shared
PB1/PB2	PB2	81	95	15	TNAEDIGTKGQMCSI	0	0	1	1			Shared
PB1/PB2	PB2	86	100	15	IGTKGQMCSIAAVTW	0	0	1	1			Shared
PB1/PB2	PB2	91	105	15	QMCSIAAVTWWNTYG	0	0	1	1			Shared
PB1/PB2	PB2	96	110	15	AAVTWWNTYGPIGDT	0	0	1	1			Shared
PB1/PB2	PB2	116	130	15	VYESFFLRKMRLDNA	0	0	1	1			Shared
PB1/PB2	PB2	121	135	15	FLRKMRLDNATWGRI	0	0	1	1			Shared
PB1/PB2	PB2	126	140	15	RLDNATWGRITFGPV	0	0	1	1			Shared
PB1/PB2	PB2	131	145	15	TWGRITFGPVERVRK	0	0	1	1			Shared
PB1/PB2	PB2	136	150	15	TFGPVERVRKRVLLN	0	0	1	1			Shared
PB1/PB2	PB2	141	155	15	ERVRKRVLLNPLTKE	0	0	1	1			Shared
PB1/PB2	PB2	146	160	15	RVLLNPLTKEMPPDE	0	0	1	1			Shared
PB1/PB2	PB2	151	165	15	PLTKEMPPDEASNVI	0	0	1	1			Shared
PB1/PB2	PB2	156	170	15	MPPDEASNVIMEILF	0	0	1	1			Shared
PB1/PB2	PB2	176	190	15	IPRESTWIHRELIKE	0	0	1	1			Shared
PB1/PB2	PB2	181	195	15	TWIHRELIKEKREKL	0	0	1	1			Shared
PB1/PB2	PB2	186	200	15	ELIKEKREKLKGTMI	0	0	1	1			Shared
PB1/PB2	PB2	191	205	15	KREKLKGTMITPIVL	0	0	1	1			Shared
PB1/PB2	PB2	196	210	15	KGTMITPIVLAYMLE	0	0	1	1			Shared
PB1/PB2	PB2	201	215	15	TPIVLAYMLERELVA	0	0	1	1			Shared
PB1/PB2	PB2	206	220	15	AYMLERELVARRRFL	0	0	1	1			Shared
PB1/PB2	PB2	211	225	15	RELVARRRFLPVAGA	0	0	1	1			Shared
PB1/PB2	PB2	216	230	15	RRRFLPVAGATSAEF	0	0	1	1			Shared
PB1/PB2	PB2	221	235	15	PVAGATSAEFIEMLH	0	0	1	1			Shared
PB1/PB2	PB2	226	240	15	TSAEFIEMLHCLQGE	0	0	1	1			Shared
PB1/PB2	PB2	231	245	15	IEMLHCLQGENWRQI	0	0	1	1			Shared
PB1/PB2	PB2	236	250	15	CLQGENWRQIYHPGG	0	0	1	1			Shared
PB1/PB2	PB2	241	255	15	NWRQIYHPGGNKLTE	0	0	1	1			Shared
PB1/PB2	PB2	246	260	15	YHPGGNKLTESRSQS	0	0	1	1			Shared
PB1/PB2	PB2	251	265	15	NKLTESRSQSMIVAC	0	0	1	1			Shared
PB1/PB2	PB2	256	270	15	SRSQSMIVACRKIIR	0	0	1	1			Shared
PB1/PB2	PB2	261	275	15	MIVACRKIIRRSIVA	0	0	1	1			Shared
PB1/PB2	PB2	266	280	15	RKIIRRSIVASNPLE	0	0	1	1			Shared
PB1/PB2	PB2	271	285	15	RSIVASNPLELAVEI	0	0	1	1			Shared
PB1/PB2	PB2	276	290	15	SNPLELAVEIANKTV	0	0	1	1			Shared
PB1/PB2	PB2	281	295	15	LAVEIANKTVIDTEP	0	0	1	1			Shared
PB1/PB2	PB2	286	300	15	ANKTVIDTEPLKSCL	0	0	1	1			Shared
PB1/PB2	PB2	306	320	15	GDVACDIIRAALGLK	0	0	1	1			Shared
PB1/PB2	PB2	311	325	15	DIIRAALGLKIRQRQ	0	0	1	1			Shared
PB1/PB2	PB2	316	330	15	ALGLKIRQRQRFGRL	0	0	1	1			Shared
PB1/PB2	PB2	321	335	15	IRQRQRFGRLELKRI	0	0	1	1			Shared
PB1/PB2	PB2	326	340	15	RFGRLELKRISGRGF	0	0	1	1			Shared
PB1/PB2	PB2	331	345	15	ELKRISGRGFKNDEE	0	0	1	1			Shared
PB1/PB2	PB2	336	350	15	SGRGFKNDEEILIGN	0	0	1	1			Shared
PB1/PB2	PB2	356	370	15	IGIWDGEEEFHVRCG	0	0	1	1			Shared
PB1/PB2	PB2	361	375	15	GEEEFHVRCGECRGI	0	0	1	1			Shared
PB1/PB2	PB2	366	380	15	HVRCGECRGILKKSK	0	0	1	1			Shared
PB1/PB2	PB2	401	415	15	ILCMVFSQDTRMFQG	0	0	1	1			Shared
PB1/PB2	PB2	406	420	15	FSQDTRMFQGVRGEI	0	0	1	1			Shared
PB1/PB2	PB2	411	425	15	RMFQGVRGEINFLNR	0	0	1	1			Shared
PB1/PB2	PB2	416	430	15	VRGEINFLNRAGQLL	0	0	1	1			Shared
PB1/PB2	PB2	421	435	15	NFLNRAGQLLSPMYQ	0	0	1	1			Shared
PB1/PB2	PB2	426	440	15	AGQLLSPMYQLQRYF	0	0	1	1			Shared
PB1/PB2	PB2	446	460	15	DLFDQWGYEESPKAS	0	0	1	1			Shared
PB1/PB2	PB2	451	465	15	WGYEESPKASELHGI	0	0	1	1			Shared
PB1/PB2	PB2	486	500	15	IDDFSSTETEKVSIT	0	0	1	1			Shared
PB1/PB2	PB2	491	505	15	STETEKVSITKNLSL	0	0	1	1			Shared
PB1/PB2	PB2	496	510	15	KVSITKNLSLIKRTG	0	0	1	1			Shared
PB1/PB2	PB2	501	515	15	KNLSLIKRTGEVIMG	0	0	1	1			Shared
PB1/PB2	PB2	506	520	15	IKRTGEVIMGANDVS	0	0	1	1			Shared
PB1/PB2	PB2	511	525	15	EVIMGANDVSELESQ	0	0	1	1			Shared
PB1/PB2	PB2	516	530	15	ANDVSELESQAQLMI	0	0	1	1			Shared
PB1/PB2	PB2	521	535	15	ELESQAQLMITYDTP	0	0	1	1			Shared
PB1/PB2	PB2	526	540	15	AQLMITYDTPKMWEM	0	0	1	1			Shared
PB1/PB2	PB2	531	545	15	TYDTPKMWEMGTTKE	0	0	1	1			Shared
PB1/PB2	PB2	536	550	15	KMWEMGTTKELVQNT	0	0	1	1			Shared
PB1/PB2	PB2	541	555	15	GTTKELVQNTYQWVL	0	0	1	1			Shared
PB1/PB2	PB2	546	560	15	LVQNTYQWVLKNLVT	0	0	1	1			Shared
PB1/PB2	PB2	551	565	15	YQWVLKNLVTLKAQF	0	0	1	1			Shared
PB1/PB2	PB2	556	570	15	KNLVTLKAQFLLGKE	0	0	1	1			Shared
PB1/PB2	PB2	561	575	15	LKAQFLLGKEDMFQW	0	0	1	1			Shared
PB1/PB2	PB2	566	580	15	LLGKEDMFQWDAFEA	0	0	1	1			Shared
PB1/PB2	PB2	571	585	15	DMFQWDAFEAFESII	0	0	1	1			Shared
PB1/PB2	PB2	576	590	15	DAFEAFESIIPQKMA	0	0	1	1			Shared
PB1/PB2	PB2	581	595	15	FESIIPQKMAGQYSG	0	0	1	1			Shared
PB1/PB2	PB2	586	600	15	PQKMAGQYSGFARAV	0	0	1	1			Shared
PB1/PB2	PB2	591	605	15	GQYSGFARAVLKQMR	0	0	1	1			Shared
PB1/PB2	PB2	596	610	15	FARAVLKQMRDQEVM	0	0	1	1			Shared
PB1/PB2	PB2	601	615	15	LKQMRDQEVMKTDQF	0	0	1	1			Shared
PB1/PB2	PB2	606	620	15	DQEVMKTDQFIKLLP	0	0	1	1			Shared
PB1/PB2	PB2	611	625	15	KTDQFIKLLPFCFSP	0	0	1	1			Shared
PB1/PB2	PB2	616	630	15	IKLLPFCFSPPKLRS	0	0	1	1			Shared
PB1/PB2	PB2	621	635	15	FCFSPPKLRSNGEPY	0	0	1	1			Shared
PB1/PB2	PB2	641	655	15	VLKGGGENFIEVRKG	0	0	1	1			Shared
PB1/PB2	PB2	646	660	15	GENFIEVRKGSPLFS	0	0	1	1			Shared
PB1/PB2	PB2	651	665	15	EVRKGSPLFSYNPQT	0	0	1	1			Shared
PB1/PB2	PB2	656	670	15	SPLFSYNPQTEVLTI	0	0	1	1			Shared
PB1/PB2	PB2	661	675	15	YNPQTEVLTICGRMM	0	0	1	1			Shared
PB1/PB2	PB2	666	680	15	EVLTICGRMMSLKGK	0	0	1	1			Shared
PB1/PB2	PB2	671	685	15	CGRMMSLKGKIEDEE	0	0	1	1			Shared
PB1/PB2	PB2	676	690	15	SLKGKIEDEERNRSM	0	0	1	1			Shared
PB1/PB2	PB2	681	695	15	IEDEERNRSMGNAVL	0	0	1	1			Shared
PB1/PB2	PB2	686	700	15	RNRSMGNAVLAGFLV	0	0	1	1			Shared
PB1/PB2	PB2	691	705	15	GNAVLAGFLVSGKYD	0	0	1	1			Shared
PB1/PB2	PB2	696	710	15	AGFLVSGKYDPDLGD	0	0	1	1			Shared
PB1/PB2	PB2	701	715	15	SGKYDPDLGDFKTIE	0	0	1	1			Shared
PB1/PB2	PB2	706	720	15	PDLGDFKTIEELEKL	0	0	1	1			Shared
PB1/PB2	PB2	711	725	15	FKTIEELEKLKPGEK	0	0	1	1			Shared
PB1/PB2	PB2	716	730	15	ELEKLKPGEKANILL	0	0	1	1			Shared
PB1/PB2	PB2	721	735	15	KPGEKANILLYQGKP	0	0	1	1			Shared
PB1/PB2	PB2	726	740	15	ANILLYQGKPVKVVK	0	0	1	1			Shared
PB1/PB2	PB2	731	745	15	YQGKPVKVVKRKRYS	0	0	1	1			Shared
PB1/PB2	PB2	736	750	15	VKVVKRKRYSALSND	0	0	1	1			Shared
PB1/PB2	PB2	741	755	15	RKRYSALSNDISQGI	0	0	1	1			Shared
PB1/PB2	PB2	746	760	15	ALSNDISQGIKRQRM	0	0	1	1			Shared
PB1/PB2	PB2	751	765	15	ISQGIKRQRMTVESM	0	0	1	1			Shared
PB1/PB2	PB2	756	770	15	KRQRMTVESMGWALS	0	0	1	1			Shared
PB1/PB2	PB1	476	490	15	NMSKKKSYINRTGTF	1	0	0	0
PB1/PB2	PB1	481	495	15	KSYINRTGTFEFTSF	1	0	0	0
PB1/PB2	PB1	486	500	15	RTGTFEFTSFFYRYG	1	0	0	0
PB1/PB2	PB1	566	580	15	TQIQTRRSFELKKLW	1	0	0	0
PB1/PB2	PB1	571	585	15	RRSFELKKLWEQTRS	1	0	0	0
PB1/PB2	PB1	576	590	15	LKKLWEQTRSKAGLL	1	0	0	0
PB1/PB2	PB1	581	595	15	EQTRSKAGLLVSDGG	1	0	0	0
PB1/PB2	PB1	586	600	15	KAGLLVSDGGPNLYN	1	0	0	0
PB1/PB2	PB1	606	620	15	IPEVCLKWELMDEDY	1	0	0	0
PB1/PB2	PB1	611	625	15	LKWELMDEDYQGRLC	1	0	0	0
PB1/PB2	PB1	616	630	15	MDEDYQGRLCNPLNP	1	0	0	0
PB1/PB2	PB1	621	635	15	QGRLCNPLNPFVSHK	1	0	0	0
PB1/PB2	PB1	696	710	15	FEKFFPSSSYRRPVG	1	0	0	0
PB1/PB2	PB1	701	715	15	PSSSYRRPVGISSMV	1	0	0	0
PB1/PB2	PB1	706	720	15	RRPVGISSMVEAMVS	1	0	0	0
PB1/PB2	PB1	746	758	13	ICSTIEELRRQKQ	1	0	0	0
PB1/PB2	PB2	31	45	15	IKKYTSGRQEKNPAL	1	0	0	0
PB1/PB2	PB2	36	50	15	SGRQEKNPALRMKWM	1	0	0	0
PB1/PB2	PB2	41	55	15	KNPALRMKWMMAMKY	1	0	0	0
PB1/PB2	PB2	56	70	15	PITADKRITEMIPER	1	0	0	0
PB1/PB2	PB2	61	75	15	KRITEMIPERNEQGQ	1	0	0	0
PB1/PB2	PB2	66	80	15	MIPERNEQGQTLWSK	1	0	0	0
PB1/PB2	PB2	71	85	15	NEQGQTLWSKMNDAG	1	0	0	0
PB1/PB2	PB2	76	90	15	TLWSKMNDAGSDRVM	1	0	0	0
PB1/PB2	PB2	81	95	15	MNDAGSDRVMVSPLA	1	0	0	0
PB1/PB2	PB2	91	105	15	VSPLAVTWWNRNGPI	1	0	0	0
PB1/PB2	PB2	96	110	15	VTWWNRNGPITNTVH	1	0	0	0
PB1/PB2	PB2	101	115	15	RNGPITNTVHYPKIY	1	0	0	0
PB1/PB2	PB2	106	120	15	TNTVHYPKIYKTYFE	1	0	0	0
PB1/PB2	PB2	111	125	15	YPKIYKTYFERVERL	1	0	0	0
PB1/PB2	PB2	116	130	15	KTYFERVERLKHGTF	1	0	0	0
PB1/PB2	PB2	121	135	15	RVERLKHGTFGPVHF	1	0	0	0
PB1/PB2	PB2	181	195	15	SQLTITKEKKEELQD	1	0	0	0
PB1/PB2	PB2	186	200	15	TKEKKEELQDCKISP	1	0	0	0
PB1/PB2	PB2	191	205	15	EELQDCKISPLMVAY	1	0	0	0
PB1/PB2	PB2	216	230	15	RFLPVAGGTSSVYIE	1	0	0	0
PB1/PB2	PB2	221	235	15	AGGTSSVYIEVLHLT	1	0	0	0
PB1/PB2	PB2	226	240	15	SVYIEVLHLTQGTCW	1	0	0	0
PB1/PB2	PB2	236	250	15	QGTCWEQMYTPGGEV	1	0	0	0
PB1/PB2	PB2	241	255	15	EQMYTPGGEVRNDDV	1	0	0	0
PB1/PB2	PB2	246	260	15	PGGEVRNDDVDQSLI	1	0	0	0
PB1/PB2	PB2	281	295	15	LEMCHSTQIGGIRMV	1	0	0	0
PB1/PB2	PB2	286	300	15	STQIGGIRMVDILRQ	1	0	0	0
PB1/PB2	PB2	291	305	15	GIRMVDILRQNPTEE	1	0	0	0
PB1/PB2	PB2	296	310	15	DILRQNPTEEQAVDI	1	0	0	0
PB1/PB2	PB2	326	340	15	GGFTFKRTSGSSVKR	1	0	0	0
PB1/PB2	PB2	331	345	15	KRTSGSSVKREEEVL	1	0	0	0
PB1/PB2	PB2	336	350	15	SSVKREEEVLTGNLQ	1	0	0	0
PB1/PB2	PB2	341	355	15	EEEVLTGNLQTLKIR	1	0	0	0
PB1/PB2	PB2	346	360	15	TGNLQTLKIRVHEGY	1	0	0	0
PB1/PB2	PB2	351	365	15	TLKIRVHEGYEEFTM	1	0	0	0
PB1/PB2	PB2	356	370	15	VHEGYEEFTMVGRRA	1	0	0	0
PB1/PB2	PB2	361	375	15	EEFTMVGRRATAILR	1	0	0	0
PB1/PB2	PB2	366	380	15	VGRRATAILRKATRR	1	0	0	0
PB1/PB2	PB2	371	385	15	TAILRKATRRLIQLI	1	0	0	0
PB1/PB2	PB2	376	390	15	KATRRLIQLIVSGRD	1	0	0	0
PB1/PB2	PB2	381	395	15	LIQLIVSGRDEQSIA	1	0	0	0
PB1/PB2	PB2	441	455	15	DAKVLFQNWGVEPID	1	0	0	0
PB1/PB2	PB2	446	460	15	FQNWGVEPIDNVMGM	1	0	0	0
PB1/PB2	PB2	451	465	15	VEPIDNVMGMIGILP	1	0	0	0
PB1/PB2	PB2	456	470	15	NVMGMIGILPDMTPS	1	0	0	0
PB1/PB2	PB2	461	475	15	IGILPDMTPSIEMSM	1	0	0	0
PB1/PB2	PB2	466	480	15	DMTPSIEMSMRGVRI	1	0	0	0
PB1/PB2	PB2	471	485	15	IEMSMRGVRISKMGV	1	0	0	0
PB1/PB2	PB2	476	490	15	RGVRISKMGVDEYSS	1	0	0	0
PB1/PB2	PB2	491	505	15	TERVVVSIDRFLRIR	1	0	0	0
PB1/PB2	PB2	496	510	15	VSIDRFLRIRDQRGN	1	0	0	0
PB1/PB2	PB2	501	515	15	FLRIRDQRGNVLLSP	1	0	0	0
PB1/PB2	PB2	516	530	15	EEVSETQGTEKLTIT	1	0	0	0
PB1/PB2	PB2	521	535	15	TQGTEKLTITYSSSM	1	0	0	0
PB1/PB2	PB2	526	540	15	KLTITYSSSMMWEIN	1	0	0	0
PB1/PB2	PB2	546	560	15	LVNTYQWIIRNWETV	1	0	0	0
PB1/PB2	PB2	551	565	15	QWIIRNWETVKIQWS	1	0	0	0
PB1/PB2	PB2	556	570	15	NWETVKIQWSQNPTM	1	0	0	0
PB1/PB2	PB2	561	575	15	KIQWSQNPTMLYNKM	1	0	0	0
PB1/PB2	PB2	566	580	15	QNPTMLYNKMEFEPF	1	0	0	0
PB1/PB2	PB2	576	590	15	EFEPFQSLVPKAIRG	1	0	0	0
PB1/PB2	PB2	581	595	15	QSLVPKAIRGQYSGF	1	0	0	0
PB1/PB2	PB2	586	600	15	KAIRGQYSGFVRTLF	1	0	0	0
PB1/PB2	PB2	626	640	15	PKQSRMQFSSFTVNV	1	0	0	0
PB1/PB2	PB2	631	645	15	MQFSSFTVNVRGSGM	1	0	0	0
PB1/PB2	PB2	636	650	15	FTVNVRGSGMRILVR	1	0	0	0
PB1/PB2	PB2	651	665	15	GNSPVFNYNKATKRL	1	0	0	0
PB1/PB2	PB2	656	670	15	FNYNKATKRLTVLGK	1	0	0	0
PB1/PB2	PB2	661	675	15	ATKRLTVLGKDAGTL	1	0	0	0
PB1/PB2	PB2	666	680	15	TVLGKDAGTLTEDPD	1	0	0	0
PB1/PB2	PB2	671	685	15	DAGTLTEDPDEGTAG	1	0	0	0
PB1/PB2	PB2	676	690	15	TEDPDEGTAGVESAV	1	0	0	0
PB1/PB2	PB2	681	695	15	EGTAGVESAVLRGFL	1	0	0	0
PB1/PB2	PB2	686	700	15	VESAVLRGFLILGKE	1	0	0	0
PB1/PB2	PB2	691	705	15	LRGFLILGKEDKRYG	1	0	0	0
PB1/PB2	PB2	696	710	15	ILGKEDKRYGPALSI	1	0	0	0
PB1/PB2	PB2	701	715	15	DKRYGPALSINELSN	1	0	0	0
PB1/PB2	PB1	476	490	15	NMSKKKSYINKTGTF	0	1	0	0
PB1/PB2	PB1	481	495	15	KSYINKTGTFEFTSF	0	1	0	0
PB1/PB2	PB1	486	500	15	KTGTFEFTSFFYRYG	0	1	0	0
PB1/PB2	PB1	566	580	15	TQIQTRRSFEIKKLW	0	1	0	0
PB1/PB2	PB1	571	585	15	RRSFEIKKLWDQTQS	0	1	0	0
PB1/PB2	PB1	576	590	15	IKKLWDQTQSRTGLL	0	1	0	0
PB1/PB2	PB1	581	595	15	DQTQSRTGLLVSDGG	0	1	0	0
PB1/PB2	PB1	586	600	15	RTGLLVSDGGPNLYN	0	1	0	0
PB1/PB2	PB1	606	620	15	IPEVCLKWELMDENY	0	1	0	0
PB1/PB2	PB1	611	625	15	LKWELMDENYRGRLC	0	1	0	0
PB1/PB2	PB1	616	630	15	MDENYRGRLCNPLNP	0	1	0	0
PB1/PB2	PB1	621	635	15	RGRLCNPLNPFVSHK	0	1	0	0
PB1/PB2	PB1	696	710	15	FEKFFPSSSYRRPIG	0	1	0	0
PB1/PB2	PB1	701	715	15	PSSSYRRPIGISSMV	0	1	0	0
PB1/PB2	PB1	706	720	15	RRPIGISSMVEAMVS	0	1	0	0
PB1/PB2	PB1	746	757	12	ICSTIEELRRQK	0	1	0	0
PB1/PB2	PB2	31	45	15	IKKYTSGRQEKNPSL	0	1	0	0
PB1/PB2	PB2	36	50	15	SGRQEKNPSLRMKWM	0	1	0	0
PB1/PB2	PB2	41	55	15	KNPSLRMKWMMAMKY	0	1	0	0
PB1/PB2	PB2	56	70	15	PITADKRITEMVPER	0	1	0	0
PB1/PB2	PB2	61	75	15	KRITEMVPERNEQGQ	0	1	0	0
PB1/PB2	PB2	66	80	15	MVPERNEQGQTLWSK	0	1	0	0
PB1/PB2	PB2	71	85	15	NEQGQTLWSKMSDAG	0	1	0	0
PB1/PB2	PB2	76	90	15	TLWSKMSDAGSDRVM	0	1	0	0
PB1/PB2	PB2	81	95	15	MSDAGSDRVMVSPLA	0	1	0	0
PB1/PB2	PB2	91	105	15	VSPLAVTWWNRNGPV	0	1	0	0
PB1/PB2	PB2	96	110	15	VTWWNRNGPVTSTVH	0	1	0	0
PB1/PB2	PB2	101	115	15	RNGPVTSTVHYPKVY	0	1	0	0
PB1/PB2	PB2	106	120	15	TSTVHYPKVYKTYFD	0	1	0	0
PB1/PB2	PB2	111	125	15	YPKVYKTYFDKVERL	0	1	0	0
PB1/PB2	PB2	116	130	15	KTYFDKVERLKHGTF	0	1	0	0
PB1/PB2	PB2	121	135	15	KVERLKHGTFGPVHF	0	1	0	0
PB1/PB2	PB2	181	195	15	SQLTITKEKKEELRD	0	1	0	0
PB1/PB2	PB2	186	200	15	TKEKKEELRDCKISP	0	1	0	0
PB1/PB2	PB2	191	205	15	EELRDCKISPLMVAY	0	1	0	0
PB1/PB2	PB2	216	230	15	RFLPVAGGTSSIYIE	0	1	0	0
PB1/PB2	PB2	221	235	15	AGGTSSIYIEVLHLT	0	1	0	0
PB1/PB2	PB2	226	240	15	SIYIEVLHLTQGTCW	0	1	0	0
PB1/PB2	PB2	236	250	15	QGTCWEQMYTPGGGV	0	1	0	0
PB1/PB2	PB2	241	255	15	EQMYTPGGGVRNDDV	0	1	0	0
PB1/PB2	PB2	246	260	15	PGGGVRNDDVDQSLI	0	1	0	0
PB1/PB2	PB2	281	295	15	LEMCHSTQIGGTRMV	0	1	0	0
PB1/PB2	PB2	286	300	15	STQIGGTRMVDILKQ	0	1	0	0
PB1/PB2	PB2	291	305	15	GTRMVDILKQNPTEE	0	1	0	0
PB1/PB2	PB2	296	310	15	DILKQNPTEEQAVDI	0	1	0	0
PB1/PB2	PB2	326	340	15	GGFTFKRTSGSSVKK	0	1	0	0
PB1/PB2	PB2	331	345	15	KRTSGSSVKKEEEVL	0	1	0	0
PB1/PB2	PB2	336	350	15	SSVKKEEEVLTGNLQ	0	1	0	0
PB1/PB2	PB2	341	355	15	EEEVLTGNLQTLRIR	0	1	0	0
PB1/PB2	PB2	346	360	15	TGNLQTLRIRVHEGY	0	1	0	0
PB1/PB2	PB2	351	365	15	TLRIRVHEGYEEFTM	0	1	0	0
PB1/PB2	PB2	356	370	15	VHEGYEEFTMVGKRA	0	1	0	0
PB1/PB2	PB2	361	375	15	EEFTMVGKRATAILR	0	1	0	0
PB1/PB2	PB2	366	380	15	VGKRATAILRKATRR	0	1	0	0
PB1/PB2	PB2	371	385	15	TAILRKATRRLVQLI	0	1	0	0
PB1/PB2	PB2	376	390	15	KATRRLVQLIVSGRD	0	1	0	0
PB1/PB2	PB2	381	395	15	LVQLIVSGRDEQSIA	0	1	0	0
PB1/PB2	PB2	441	455	15	DAKVLFQNWGVEHID	0	1	0	0
PB1/PB2	PB2	446	460	15	FQNWGVEHIDSVMGM	0	1	0	0
PB1/PB2	PB2	451	465	15	VEHIDSVMGMVGVLP	0	1	0	0
PB1/PB2	PB2	456	470	15	SVMGMVGVLPDMTPS	0	1	0	0
PB1/PB2	PB2	461	475	15	VGVLPDMTPSTEMSM	0	1	0	0
PB1/PB2	PB2	466	480	15	DMTPSTEMSMRGIRV	0	1	0	0
PB1/PB2	PB2	471	485	15	TEMSMRGIRVSKMGV	0	1	0	0
PB1/PB2	PB2	476	490	15	RGIRVSKMGVDEYSS	0	1	0	0
PB1/PB2	PB2	491	505	15	TERVVVSIDRFLRVR	0	1	0	0
PB1/PB2	PB2	496	510	15	VSIDRFLRVRDQRGN	0	1	0	0
PB1/PB2	PB2	501	515	15	FLRVRDQRGNVLLSP	0	1	0	0
PB1/PB2	PB2	516	530	15	EEVSETQGTERLTIT	0	1	0	0
PB1/PB2	PB2	521	535	15	TQGTERLTITYSSSM	0	1	0	0
PB1/PB2	PB2	526	540	15	RLTITYSSSMMWEIN	0	1	0	0
PB1/PB2	PB2	546	560	15	LVNTYQWIIRNWEAV	0	1	0	0
PB1/PB2	PB2	551	565	15	QWIIRNWEAVKIQWS	0	1	0	0
PB1/PB2	PB2	556	570	15	NWEAVKIQWSQNPAM	0	1	0	0
PB1/PB2	PB2	561	575	15	KIQWSQNPAMLYNKM	0	1	0	0
PB1/PB2	PB2	566	580	15	QNPAMLYNKMEFEPF	0	1	0	0
PB1/PB2	PB2	576	590	15	EFEPFQSLVPKATRS	0	1	0	0
PB1/PB2	PB2	581	595	15	QSLVPKATRSQYSGF	0	1	0	0
PB1/PB2	PB2	586	600	15	KATRSQYSGFVRTLF	0	1	0	0
PB1/PB2	PB2	626	640	15	PKQSRMQFSSLTVNV	0	1	0	0
PB1/PB2	PB2	631	645	15	MQFSSLTVNVRGSGM	0	1	0	0
PB1/PB2	PB2	636	650	15	LTVNVRGSGMRILVR	0	1	0	0
PB1/PB2	PB2	651	665	15	GNSPVFNYNKTTKRL	0	1	0	0
PB1/PB2	PB2	656	670	15	FNYNKTTKRLTILGK	0	1	0	0
PB1/PB2	PB2	661	675	15	TTKRLTILGKDAGTL	0	1	0	0
PB1/PB2	PB2	666	680	15	TILGKDAGTLIEDPD	0	1	0	0
PB1/PB2	PB2	671	685	15	DAGTLIEDPDESTSG	0	1	0	0
PB1/PB2	PB2	676	690	15	IEDPDESTSGVESAV	0	1	0	0
PB1/PB2	PB2	681	695	15	ESTSGVESAVLRGFL	0	1	0	0
PB1/PB2	PB2	686	700	15	VESAVLRGFLIIGKE	0	1	0	0
PB1/PB2	PB2	691	705	15	LRGFLIIGKEDRRYG	0	1	0	0
PB1/PB2	PB2	696	710	15	IIGKEDRRYGPALSI	0	1	0	0
PB1/PB2	PB2	701	715	15	DRRYGPALSINELSN	0	1	0	0
PB1/PB2	PB1	381	395	15	YNEETRAKLKKLKPF	0	0	1	0
PB1/PB2	PB1	386	400	15	RAKLKKLKPFFNEEG	0	0	1	0
PB1/PB2	PB1	391	405	15	KLKPFFNEEGTASLS	0	0	1	0
PB1/PB2	PB1	496	510	15	YRDGFVSNFAMELPS	0	0	1	0
PB1/PB2	PB1	501	515	15	VSNFAMELPSFGVAG	0	0	1	0
PB1/PB2	PB1	506	520	15	MELPSFGVAGVNESA	0	0	1	0
PB1/PB2	PB1	606	620	15	PEIVLKYNLMDPEYR	0	0	1	0
PB1/PB2	PB1	611	625	15	KYNLMDPEYRGRLLH	0	0	1	0
PB1/PB2	PB1	616	630	15	DPEYRGRLLHPQNPF	0	0	1	0
PB1/PB2	PB1	641	655	15	EADITPAHGPVKKMD	0	0	1	0
PB1/PB2	PB1	646	660	15	PAHGPVKKMDYDAVS	0	0	1	0
PB1/PB2	PB1	651	665	15	VKKMDYDAVSGTHSW	0	0	1	0
PB1/PB2	PB1	741	752	12	KAMAHLGEIGYI	0	0	1	0
PB1/PB2	PB2	101	115	15	WNTYGPIGDTEGFER	0	0	1	0
PB1/PB2	PB2	106	120	15	PIGDTEGFERVYESF	0	0	1	0
PB1/PB2	PB2	111	125	15	EGFERVYESFFLRKM	0	0	1	0
PB1/PB2	PB2	161	175	15	ASNVIMEILFPKEAG	0	0	1	0
PB1/PB2	PB2	166	180	15	MEILFPKEAGIPRES	0	0	1	0
PB1/PB2	PB2	171	185	15	PKEAGIPRESTWIHR	0	0	1	0
PB1/PB2	PB2	291	305	15	IDTEPLKSCLAAIDG	0	0	1	0
PB1/PB2	PB2	296	310	15	LKSCLAAIDGGDVAC	0	0	1	0
PB1/PB2	PB2	301	315	15	AAIDGGDVACDIIRA	0	0	1	0
PB1/PB2	PB2	341	355	15	KNDEEILIGNGTIQK	0	0	1	0
PB1/PB2	PB2	346	360	15	ILIGNGTIQKIGIWD	0	0	1	0
PB1/PB2	PB2	351	365	15	GTIQKIGIWDGEEEF	0	0	1	0
PB1/PB2	PB2	371	385	15	ECRGILKKSKMKLEK	0	0	1	0
PB1/PB2	PB2	376	390	15	LKKSKMKLEKLLINS	0	0	1	0
PB1/PB2	PB2	381	395	15	MKLEKLLINSAKKED	0	0	1	0
PB1/PB2	PB2	386	400	15	LLINSAKKEDMRDLI	0	0	1	0
PB1/PB2	PB2	391	405	15	AKKEDMRDLIILCMV	0	0	1	0
PB1/PB2	PB2	396	410	15	MRDLIILCMVFSQDT	0	0	1	0
PB1/PB2	PB2	431	445	15	SPMYQLQRYFLNRSN	0	0	1	0
PB1/PB2	PB2	436	450	15	LQRYFLNRSNDLFDQ	0	0	1	0
PB1/PB2	PB2	441	455	15	LNRSNDLFDQWGYEE	0	0	1	0
PB1/PB2	PB2	456	470	15	SPKASELHGINESMN	0	0	1	0
PB1/PB2	PB2	461	475	15	ELHGINESMNASDYT	0	0	1	0
PB1/PB2	PB2	466	480	15	NESMNASDYTLKGIV	0	0	1	0
PB1/PB2	PB2	471	485	15	ASDYTLKGIVVTRNV	0	0	1	0
PB1/PB2	PB2	476	490	15	LKGIVVTRNVIDDFS	0	0	1	0
PB1/PB2	PB2	481	495	15	VTRNVIDDFSSTETE	0	0	1	0
PB1/PB2	PB2	626	640	15	PKLRSNGEPYQFLKL	0	0	1	0
PB1/PB2	PB2	631	645	15	NGEPYQFLKLVLKGG	0	0	1	0
PB1/PB2	PB2	636	650	15	QFLKLVLKGGGENFI	0	0	1	0
PB1/PB2	PB1	381	395	15	YNEETRAKLKRLKPF	0	0	0	1
PB1/PB2	PB1	386	400	15	RAKLKRLKPFFNEEG	0	0	0	1
PB1/PB2	PB1	391	405	15	RLKPFFNEEGTASLS	0	0	0	1
PB1/PB2	PB1	496	510	15	YRDGFVSNFAMEIPS	0	0	0	1
PB1/PB2	PB1	501	515	15	VSNFAMEIPSFGVAG	0	0	0	1
PB1/PB2	PB1	506	520	15	MEIPSFGVAGVNESA	0	0	0	1
PB1/PB2	PB1	606	620	15	PEIVLKYNLMDPEYK	0	0	0	1
PB1/PB2	PB1	611	625	15	KYNLMDPEYKGRLLH	0	0	0	1
PB1/PB2	PB1	616	630	15	DPEYKGRLLHPQNPF	0	0	0	1
PB1/PB2	PB1	641	655	15	EADITPAHGPVRKMD	0	0	0	1
PB1/PB2	PB1	646	660	15	PAHGPVRKMDYDAVS	0	0	0	1
PB1/PB2	PB1	651	665	15	VRKMDYDAVSGTHSW	0	0	0	1
PB1/PB2	PB1	741	752	12	KAMAHLGEIGYT	0	0	0	1
PB1/PB2	PB2	101	115	15	WNTYGPIGDTEGFEK	0	0	0	1
PB1/PB2	PB2	106	120	15	PIGDTEGFEKVYESF	0	0	0	1
PB1/PB2	PB2	111	125	15	EGFEKVYESFFLRKM	0	0	0	1
PB1/PB2	PB2	161	175	15	ASNVIMEILFPXEAG	0	0	0	1
PB1/PB2	PB2	166	180	15	MEILFPXEAGIPRES	0	0	0	1
PB1/PB2	PB2	171	185	15	PXEAGIPRESTWIHR	0	0	0	1
PB1/PB2	PB2	291	305	15	IDTEPLKSCLTAIDG	0	0	0	1
PB1/PB2	PB2	296	310	15	LKSCLTAIDGGDVAC	0	0	0	1
PB1/PB2	PB2	301	315	15	TAIDGGDVACDIIRA	0	0	0	1
PB1/PB2	PB2	341	355	15	KNDEEILIGNGTIHK	0	0	0	1
PB1/PB2	PB2	346	360	15	ILIGNGTIHKIGIWD	0	0	0	1
PB1/PB2	PB2	351	365	15	GTIHKIGIWDGEEEF	0	0	0	1
PB1/PB2	PB2	371	385	15	ECRGILKKSKMRMEK	0	0	0	1
PB1/PB2	PB2	376	390	15	LKKSKMRMEKLLINS	0	0	0	1
PB1/PB2	PB2	381	395	15	MRMEKLLINSAKKED	0	0	0	1
PB1/PB2	PB2	386	400	15	LLINSAKKEDMKDLI	0	0	0	1
PB1/PB2	PB2	391	405	15	AKKEDMKDLIILCMV	0	0	0	1
PB1/PB2	PB2	396	410	15	MKDLIILCMVFSQDT	0	0	0	1
PB1/PB2	PB2	431	445	15	SPMYQLQRYFLSRSN	0	0	0	1
PB1/PB2	PB2	436	450	15	LQRYFLSRSNDLFDQ	0	0	0	1
PB1/PB2	PB2	441	455	15	LSRSNDLFDQWGYEE	0	0	0	1
PB1/PB2	PB2	456	470	15	SPKASELHGINELMN	0	0	0	1
PB1/PB2	PB2	461	475	15	ELHGINELMNASDYT	0	0	0	1
PB1/PB2	PB2	466	480	15	NELMNASDYTLKGVV	0	0	0	1
PB1/PB2	PB2	471	485	15	ASDYTLKGVVVTKNV	0	0	0	1
PB1/PB2	PB2	476	490	15	LKGVVVTKNVIDDFS	0	0	0	1
PB1/PB2	PB2	481	495	15	VTKNVIDDFSSTETE	0	0	0	1
PB1/PB2	PB2	626	640	15	PKLRSNGEPYQFLRL	0	0	0	1
PB1/PB2	PB2	631	645	15	NGEPYQFLRLVLKGG	0	0	0	1
PB1/PB2	PB2	636	650	15	QFLRLVLKGGGENFI	0	0	0	1

## Sheet: OTHER
Supplementary Table S4. Composition of the Human Influenza A and B viruses homologs of OTHER (NP/M1/M2/NS1/NEP) epitopes.
MP	Protein	start	End	Length	Sequence	A/H1N1	A/H3N2	B/IOWA	B/SING	ALL	A	B
NP/M1/M2/NS1/NEP	NP	1	15	15	MASQGTKRSYEQMET	1	1	0	0		Shared
NP/M1/M2/NS1/NEP	NP	36	50	15	IGRFYIQMCTELKLS	1	1	0	0		Shared
NP/M1/M2/NS1/NEP	NP	66	80	15	MVLSAFDERRNKYLE	1	1	0	0		Shared
NP/M1/M2/NS1/NEP	NP	71	85	15	FDERRNKYLEEHPSA	1	1	0	0		Shared
NP/M1/M2/NS1/NEP	NP	76	90	15	NKYLEEHPSAGKDPK	1	1	0	0		Shared
NP/M1/M2/NS1/NEP	NP	81	95	15	EHPSAGKDPKKTGGP	1	1	0	0		Shared
NP/M1/M2/NS1/NEP	NP	86	100	15	GKDPKKTGGPIYRRV	1	1	0	0		Shared
NP/M1/M2/NS1/NEP	NP	111	125	15	YDKEEIRRIWRQANN	1	1	0	0		Shared
NP/M1/M2/NS1/NEP	NP	141	155	15	SNLNDATYQRTRALV	1	1	0	0		Shared
NP/M1/M2/NS1/NEP	NP	146	160	15	ATYQRTRALVRTGMD	1	1	0	0		Shared
NP/M1/M2/NS1/NEP	NP	151	165	15	TRALVRTGMDPRMCS	1	1	0	0		Shared
NP/M1/M2/NS1/NEP	NP	156	170	15	RTGMDPRMCSLMQGS	1	1	0	0		Shared
NP/M1/M2/NS1/NEP	NP	161	175	15	PRMCSLMQGSTLPRR	1	1	0	0		Shared
NP/M1/M2/NS1/NEP	NP	166	180	15	LMQGSTLPRRSGAAG	1	1	0	0		Shared
NP/M1/M2/NS1/NEP	NP	171	185	15	TLPRRSGAAGAAVKG	1	1	0	0		Shared
NP/M1/M2/NS1/NEP	NP	201	215	15	INDRNFWRGENGRKT	1	1	0	0		Shared
NP/M1/M2/NS1/NEP	NP	221	235	15	RMCNILKGKFQTAAQ	1	1	0	0		Shared
NP/M1/M2/NS1/NEP	NP	261	275	15	RSALILRGSVAHKSC	1	1	0	0		Shared
NP/M1/M2/NS1/NEP	NP	316	330	15	IRPNENPAHKSQLVW	1	1	0	0		Shared
NP/M1/M2/NS1/NEP	NP	321	335	15	NPAHKSQLVWMACHS	1	1	0	0		Shared
NP/M1/M2/NS1/NEP	NP	326	340	15	SQLVWMACHSAAFED	1	1	0	0		Shared
NP/M1/M2/NS1/NEP	NP	356	370	15	GKLSTRGVQIASNEN	1	1	0	0		Shared
NP/M1/M2/NS1/NEP	NP	386	400	15	WAIRTRSGGNTNQQR	1	1	0	0		Shared
NP/M1/M2/NS1/NEP	NP	391	405	15	RSGGNTNQQRASAGQ	1	1	0	0		Shared
NP/M1/M2/NS1/NEP	NP	476	490	15	VPSFDMSNEGSYFFG	1	1	0	0		Shared
NP/M1/M2/NS1/NEP	NP	481	495	15	MSNEGSYFFGDNAEE	1	1	0	0		Shared
NP/M1/M2/NS1/NEP	NP	486	498	13	SYFFGDNAEEYDN	1	1	0	0		Shared
NP/M1/M2/NS1/NEP	M1	16	30	15	PSGPLKAEIAQRLED	1	1	0	0		Shared
NP/M1/M2/NS1/NEP	M1	21	35	15	KAEIAQRLEDVFAGK	1	1	0	0		Shared
NP/M1/M2/NS1/NEP	M1	26	40	15	QRLEDVFAGKNTDLE	1	1	0	0		Shared
NP/M1/M2/NS1/NEP	M1	46	60	15	LKTRPILSPLTKGIL	1	1	0	0		Shared
NP/M1/M2/NS1/NEP	M1	51	65	15	ILSPLTKGILGFVFT	1	1	0	0		Shared
NP/M1/M2/NS1/NEP	M1	56	70	15	TKGILGFVFTLTVPS	1	1	0	0		Shared
NP/M1/M2/NS1/NEP	M1	61	75	15	GFVFTLTVPSERGLQ	1	1	0	0		Shared
NP/M1/M2/NS1/NEP	M1	66	80	15	LTVPSERGLQRRRFV	1	1	0	0		Shared
NP/M1/M2/NS1/NEP	M1	71	85	15	ERGLQRRRFVQNALN	1	1	0	0		Shared
NP/M1/M2/NS1/NEP	M1	76	90	15	RRRFVQNALNGNGDP	1	1	0	0		Shared
NP/M1/M2/NS1/NEP	M1	81	95	15	QNALNGNGDPNNMDK	1	1	0	0		Shared
NP/M1/M2/NS1/NEP	M1	86	100	15	GNGDPNNMDKAVKLY	1	1	0	0		Shared
NP/M1/M2/NS1/NEP	M1	91	105	15	NNMDKAVKLYRKLKR	1	1	0	0		Shared
NP/M1/M2/NS1/NEP	M1	96	110	15	AVKLYRKLKREITFH	1	1	0	0		Shared
NP/M1/M2/NS1/NEP	M1	101	115	15	RKLKREITFHGAKEI	1	1	0	0		Shared
NP/M1/M2/NS1/NEP	M1	121	135	15	AGALASCMGLIYNRM	1	1	0	0		Shared
NP/M1/M2/NS1/NEP	M1	126	140	15	SCMGLIYNRMGAVTT	1	1	0	0		Shared
NP/M1/M2/NS1/NEP	M1	131	145	15	IYNRMGAVTTEVAFG	1	1	0	0		Shared
NP/M1/M2/NS1/NEP	M1	136	150	15	GAVTTEVAFGLVCAT	1	1	0	0		Shared
NP/M1/M2/NS1/NEP	M1	141	155	15	EVAFGLVCATCEQIA	1	1	0	0		Shared
NP/M1/M2/NS1/NEP	M1	146	160	15	LVCATCEQIADSQHR	1	1	0	0		Shared
NP/M1/M2/NS1/NEP	M1	151	165	15	CEQIADSQHRSHRQM	1	1	0	0		Shared
NP/M1/M2/NS1/NEP	M1	176	190	15	ENRMVLASTTAKAME	1	1	0	0		Shared
NP/M1/M2/NS1/NEP	M1	181	195	15	LASTTAKAMEQMAGS	1	1	0	0		Shared
NP/M1/M2/NS1/NEP	M1	186	200	15	AKAMEQMAGSSEQAA	1	1	0	0		Shared
NP/M1/M2/NS1/NEP	M1	241	252	12	QKRMGVQMQRFK	1	1	0	0		Shared
NP/M1/M2/NS1/NEP	M2	1	15	15	MSLLTEVETPIRNEW	1	1	0	0		Shared
NP/M1/M2/NS1/NEP	M2	6	20	15	EVETPIRNEWGCRCN	1	1	0	0		Shared
NP/M1/M2/NS1/NEP	NS1	146	160	15	LLRAFTEEGAIVGEI	1	1	0	0		Shared
NP/M1/M2/NS1/NEP	NS1	151	165	15	TEEGAIVGEISPLPS	1	1	0	0		Shared
NP/M1/M2/NS1/NEP	NS1	181	195	15	LIGGLEWNDNTVRVS	1	1	0	0		Shared
NP/M1/M2/NS1/NEP	NEP	6	20	15	VSSFQDILLRMSKMQ	1	1	0	0		Shared
NP/M1/M2/NS1/NEP	NEP	41	55	15	YRDSLGEAVMRMGDL	1	1	0	0		Shared
NP/M1/M2/NS1/NEP	NEP	66	80	15	REQLGQKFEEIRWLI	1	1	0	0		Shared
NP/M1/M2/NS1/NEP	NEP	71	85	15	QKFEEIRWLIEEVRH	1	1	0	0		Shared
NP/M1/M2/NS1/NEP	NEP	111	121	11	QEIRTFSFQLI	1	1	0	0		Shared
NP/M1/M2/NS1/NEP	NP	11	25	15	TGTIDKTPEEITSGT	0	0	1	1			Shared
NP/M1/M2/NS1/NEP	NP	16	30	15	KTPEEITSGTSGTTR	0	0	1	1			Shared
NP/M1/M2/NS1/NEP	NP	21	35	15	ITSGTSGTTRPIIRP	0	0	1	1			Shared
NP/M1/M2/NS1/NEP	NP	26	40	15	SGTTRPIIRPATLAP	0	0	1	1			Shared
NP/M1/M2/NS1/NEP	NP	31	45	15	PIIRPATLAPPSNKR	0	0	1	1			Shared
NP/M1/M2/NS1/NEP	NP	36	50	15	ATLAPPSNKRTRNPS	0	0	1	1			Shared
NP/M1/M2/NS1/NEP	NP	41	55	15	PSNKRTRNPSPERAT	0	0	1	1			Shared
NP/M1/M2/NS1/NEP	NP	46	60	15	TRNPSPERATTSSED	0	0	1	1			Shared
NP/M1/M2/NS1/NEP	NP	51	65	15	PERATTSSEDDVGRK	0	0	1	1			Shared
NP/M1/M2/NS1/NEP	NP	71	85	15	TPTEIKKSVYNMVVK	0	0	1	1			Shared
NP/M1/M2/NS1/NEP	NP	76	90	15	KKSVYNMVVKLGEFY	0	0	1	1			Shared
NP/M1/M2/NS1/NEP	NP	81	95	15	NMVVKLGEFYNQMMV	0	0	1	1			Shared
NP/M1/M2/NS1/NEP	NP	86	100	15	LGEFYNQMMVKAGLN	0	0	1	1			Shared
NP/M1/M2/NS1/NEP	NP	91	105	15	NQMMVKAGLNDDMER	0	0	1	1			Shared
NP/M1/M2/NS1/NEP	NP	96	110	15	KAGLNDDMERNLIQN	0	0	1	1			Shared
NP/M1/M2/NS1/NEP	NP	116	130	15	RILLAATDDKKTEFQ	0	0	1	1			Shared
NP/M1/M2/NS1/NEP	NP	121	135	15	ATDDKKTEFQKKKNA	0	0	1	1			Shared
NP/M1/M2/NS1/NEP	NP	126	140	15	KTEFQKKKNARDVKE	0	0	1	1			Shared
NP/M1/M2/NS1/NEP	NP	131	145	15	KKKNARDVKEGKEEI	0	0	1	1			Shared
NP/M1/M2/NS1/NEP	NP	136	150	15	RDVKEGKEEIDHNKT	0	0	1	1			Shared
NP/M1/M2/NS1/NEP	NP	141	155	15	GKEEIDHNKTGGTFY	0	0	1	1			Shared
NP/M1/M2/NS1/NEP	NP	146	160	15	DHNKTGGTFYKMVRD	0	0	1	1			Shared
NP/M1/M2/NS1/NEP	NP	151	165	15	GGTFYKMVRDDKTIY	0	0	1	1			Shared
NP/M1/M2/NS1/NEP	NP	156	170	15	KMVRDDKTIYFSPIR	0	0	1	1			Shared
NP/M1/M2/NS1/NEP	NP	161	175	15	DKTIYFSPIRITFLK	0	0	1	1			Shared
NP/M1/M2/NS1/NEP	NP	166	180	15	FSPIRITFLKEEVKT	0	0	1	1			Shared
NP/M1/M2/NS1/NEP	NP	171	185	15	ITFLKEEVKTMYKTT	0	0	1	1			Shared
NP/M1/M2/NS1/NEP	NP	176	190	15	EEVKTMYKTTMGSDG	0	0	1	1			Shared
NP/M1/M2/NS1/NEP	NP	181	195	15	MYKTTMGSDGFSGLN	0	0	1	1			Shared
NP/M1/M2/NS1/NEP	NP	186	200	15	MGSDGFSGLNHIMIG	0	0	1	1			Shared
NP/M1/M2/NS1/NEP	NP	191	205	15	FSGLNHIMIGHSQMN	0	0	1	1			Shared
NP/M1/M2/NS1/NEP	NP	196	210	15	HIMIGHSQMNDVCFQ	0	0	1	1			Shared
NP/M1/M2/NS1/NEP	NP	201	215	15	HSQMNDVCFQRSKAL	0	0	1	1			Shared
NP/M1/M2/NS1/NEP	NP	206	220	15	DVCFQRSKALKRVGL	0	0	1	1			Shared
NP/M1/M2/NS1/NEP	NP	211	225	15	RSKALKRVGLDPSLI	0	0	1	1			Shared
NP/M1/M2/NS1/NEP	NP	216	230	15	KRVGLDPSLISTFAG	0	0	1	1			Shared
NP/M1/M2/NS1/NEP	NP	221	235	15	DPSLISTFAGSTVPR	0	0	1	1			Shared
NP/M1/M2/NS1/NEP	NP	226	240	15	STFAGSTVPRRSGAT	0	0	1	1			Shared
NP/M1/M2/NS1/NEP	NP	231	245	15	STVPRRSGATGVAIK	0	0	1	1			Shared
NP/M1/M2/NS1/NEP	NP	236	250	15	RSGATGVAIKGGGTL	0	0	1	1			Shared
NP/M1/M2/NS1/NEP	NP	241	255	15	GVAIKGGGTLVAEAI	0	0	1	1			Shared
NP/M1/M2/NS1/NEP	NP	246	260	15	GGGTLVAEAIRFIGR	0	0	1	1			Shared
NP/M1/M2/NS1/NEP	NP	251	265	15	VAEAIRFIGRAMADR	0	0	1	1			Shared
NP/M1/M2/NS1/NEP	NP	256	270	15	RFIGRAMADRGLLRD	0	0	1	1			Shared
NP/M1/M2/NS1/NEP	NP	261	275	15	AMADRGLLRDIKAKT	0	0	1	1			Shared
NP/M1/M2/NS1/NEP	NP	266	280	15	GLLRDIKAKTAYEKI	0	0	1	1			Shared
NP/M1/M2/NS1/NEP	NP	271	285	15	IKAKTAYEKILLNLK	0	0	1	1			Shared
NP/M1/M2/NS1/NEP	NP	276	290	15	AYEKILLNLKNKCSA	0	0	1	1			Shared
NP/M1/M2/NS1/NEP	NP	281	295	15	LLNLKNKCSAPQQKA	0	0	1	1			Shared
NP/M1/M2/NS1/NEP	NP	286	300	15	NKCSAPQQKALVDQV	0	0	1	1			Shared
NP/M1/M2/NS1/NEP	NP	291	305	15	PQQKALVDQVIGSRN	0	0	1	1			Shared
NP/M1/M2/NS1/NEP	NP	296	310	15	LVDQVIGSRNPGIAD	0	0	1	1			Shared
NP/M1/M2/NS1/NEP	NP	301	315	15	IGSRNPGIADIEDLT	0	0	1	1			Shared
NP/M1/M2/NS1/NEP	NP	306	320	15	PGIADIEDLTLLARS	0	0	1	1			Shared
NP/M1/M2/NS1/NEP	NP	311	325	15	IEDLTLLARSMVVVR	0	0	1	1			Shared
NP/M1/M2/NS1/NEP	NP	316	330	15	LLARSMVVVRPSVAS	0	0	1	1			Shared
NP/M1/M2/NS1/NEP	NP	321	335	15	MVVVRPSVASKVVLP	0	0	1	1			Shared
NP/M1/M2/NS1/NEP	NP	326	340	15	PSVASKVVLPISIYA	0	0	1	1			Shared
NP/M1/M2/NS1/NEP	NP	331	345	15	KVVLPISIYAKIPQL	0	0	1	1			Shared
NP/M1/M2/NS1/NEP	NP	336	350	15	ISIYAKIPQLGFNVE	0	0	1	1			Shared
NP/M1/M2/NS1/NEP	NP	341	355	15	KIPQLGFNVEEYSMV	0	0	1	1			Shared
NP/M1/M2/NS1/NEP	NP	346	360	15	GFNVEEYSMVGYEAM	0	0	1	1			Shared
NP/M1/M2/NS1/NEP	NP	351	365	15	EYSMVGYEAMALYNM	0	0	1	1			Shared
NP/M1/M2/NS1/NEP	NP	356	370	15	GYEAMALYNMATPVS	0	0	1	1			Shared
NP/M1/M2/NS1/NEP	NP	361	375	15	ALYNMATPVSILRMG	0	0	1	1			Shared
NP/M1/M2/NS1/NEP	NP	366	380	15	ATPVSILRMGDDAKD	0	0	1	1			Shared
NP/M1/M2/NS1/NEP	NP	371	385	15	ILRMGDDAKDKSQLF	0	0	1	1			Shared
NP/M1/M2/NS1/NEP	NP	376	390	15	DDAKDKSQLFFMSCF	0	0	1	1			Shared
NP/M1/M2/NS1/NEP	NP	381	395	15	KSQLFFMSCFGAAYE	0	0	1	1			Shared
NP/M1/M2/NS1/NEP	NP	386	400	15	FMSCFGAAYEDLRVL	0	0	1	1			Shared
NP/M1/M2/NS1/NEP	NP	391	405	15	GAAYEDLRVLSALTG	0	0	1	1			Shared
NP/M1/M2/NS1/NEP	NP	396	410	15	DLRVLSALTGTEFKP	0	0	1	1			Shared
NP/M1/M2/NS1/NEP	NP	401	415	15	SALTGTEFKPRSALK	0	0	1	1			Shared
NP/M1/M2/NS1/NEP	NP	406	420	15	TEFKPRSALKCKGFH	0	0	1	1			Shared
NP/M1/M2/NS1/NEP	NP	411	425	15	RSALKCKGFHVPAKE	0	0	1	1			Shared
NP/M1/M2/NS1/NEP	NP	416	430	15	CKGFHVPAKEQVEGM	0	0	1	1			Shared
NP/M1/M2/NS1/NEP	NP	421	435	15	VPAKEQVEGMGAALM	0	0	1	1			Shared
NP/M1/M2/NS1/NEP	NP	426	440	15	QVEGMGAALMSIKLQ	0	0	1	1			Shared
NP/M1/M2/NS1/NEP	NP	431	445	15	GAALMSIKLQFWAPM	0	0	1	1			Shared
NP/M1/M2/NS1/NEP	NP	436	450	15	SIKLQFWAPMTRSGG	0	0	1	1			Shared
NP/M1/M2/NS1/NEP	NP	456	470	15	DGGSGQISCSPVFAV	0	0	1	1			Shared
NP/M1/M2/NS1/NEP	NP	461	475	15	QISCSPVFAVERPIA	0	0	1	1			Shared
NP/M1/M2/NS1/NEP	NP	466	480	15	PVFAVERPIALSKQA	0	0	1	1			Shared
NP/M1/M2/NS1/NEP	NP	471	485	15	ERPIALSKQAVRRML	0	0	1	1			Shared
NP/M1/M2/NS1/NEP	NP	476	490	15	LSKQAVRRMLSMNIE	0	0	1	1			Shared
NP/M1/M2/NS1/NEP	NP	481	495	15	VRRMLSMNIEGRDAD	0	0	1	1			Shared
NP/M1/M2/NS1/NEP	NP	486	500	15	SMNIEGRDADVKGNL	0	0	1	1			Shared
NP/M1/M2/NS1/NEP	NP	491	505	15	GRDADVKGNLLKMMN	0	0	1	1			Shared
NP/M1/M2/NS1/NEP	NP	496	510	15	VKGNLLKMMNDSMAK	0	0	1	1			Shared
NP/M1/M2/NS1/NEP	NP	501	515	15	LKMMNDSMAKKTSGN	0	0	1	1			Shared
NP/M1/M2/NS1/NEP	NP	506	520	15	DSMAKKTSGNAFIGK	0	0	1	1			Shared
NP/M1/M2/NS1/NEP	NP	511	525	15	KTSGNAFIGKKMFQI	0	0	1	1			Shared
NP/M1/M2/NS1/NEP	NP	516	530	15	AFIGKKMFQISDKNK	0	0	1	1			Shared
NP/M1/M2/NS1/NEP	NP	521	535	15	KMFQISDKNKTNPIE	0	0	1	1			Shared
NP/M1/M2/NS1/NEP	NP	526	540	15	SDKNKTNPIEIPIKQ	0	0	1	1			Shared
NP/M1/M2/NS1/NEP	NP	531	545	15	TNPIEIPIKQTIPNF	0	0	1	1			Shared
NP/M1/M2/NS1/NEP	NP	536	550	15	IPIKQTIPNFFFGRD	0	0	1	1			Shared
NP/M1/M2/NS1/NEP	NP	541	555	15	TIPNFFFGRDTAEDY	0	0	1	1			Shared
NP/M1/M2/NS1/NEP	NP	546	560	15	FFGRDTAEDYDDLDY	0	0	1	1			Shared
NP/M1/M2/NS1/NEP	M1	1	15	15	MSLFGDTIAYLLSLT	0	0	1	1			Shared
NP/M1/M2/NS1/NEP	M1	6	20	15	DTIAYLLSLTEDGEG	0	0	1	1			Shared
NP/M1/M2/NS1/NEP	M1	11	25	15	LLSLTEDGEGKAELA	0	0	1	1			Shared
NP/M1/M2/NS1/NEP	M1	16	30	15	EDGEGKAELAEKLHC	0	0	1	1			Shared
NP/M1/M2/NS1/NEP	M1	21	35	15	KAELAEKLHCWFGGK	0	0	1	1			Shared
NP/M1/M2/NS1/NEP	M1	26	40	15	EKLHCWFGGKEFDLD	0	0	1	1			Shared
NP/M1/M2/NS1/NEP	M1	31	45	15	WFGGKEFDLDSALEW	0	0	1	1			Shared
NP/M1/M2/NS1/NEP	M1	36	50	15	EFDLDSALEWIKNKR	0	0	1	1			Shared
NP/M1/M2/NS1/NEP	M1	41	55	15	SALEWIKNKRCLTDI	0	0	1	1			Shared
NP/M1/M2/NS1/NEP	M1	46	60	15	IKNKRCLTDIQKALI	0	0	1	1			Shared
NP/M1/M2/NS1/NEP	M1	51	65	15	CLTDIQKALIGASIC	0	0	1	1			Shared
NP/M1/M2/NS1/NEP	M1	56	70	15	QKALIGASICFLKPK	0	0	1	1			Shared
NP/M1/M2/NS1/NEP	M1	61	75	15	GASICFLKPKDQERK	0	0	1	1			Shared
NP/M1/M2/NS1/NEP	M1	66	80	15	FLKPKDQERKRRFIT	0	0	1	1			Shared
NP/M1/M2/NS1/NEP	M1	71	85	15	DQERKRRFITEPLSG	0	0	1	1			Shared
NP/M1/M2/NS1/NEP	M1	76	90	15	RRFITEPLSGMGTTA	0	0	1	1			Shared
NP/M1/M2/NS1/NEP	M1	81	95	15	EPLSGMGTTATKKKG	0	0	1	1			Shared
NP/M1/M2/NS1/NEP	M1	86	100	15	MGTTATKKKGLILAE	0	0	1	1			Shared
NP/M1/M2/NS1/NEP	M1	106	120	15	CVSFHEAFEIAEGHE	0	0	1	1			Shared
NP/M1/M2/NS1/NEP	M1	111	125	15	EAFEIAEGHESSALL	0	0	1	1			Shared
NP/M1/M2/NS1/NEP	M1	116	130	15	AEGHESSALLYCLMV	0	0	1	1			Shared
NP/M1/M2/NS1/NEP	M1	121	135	15	SSALLYCLMVMYLNP	0	0	1	1			Shared
NP/M1/M2/NS1/NEP	M1	126	140	15	YCLMVMYLNPGNYSM	0	0	1	1			Shared
NP/M1/M2/NS1/NEP	M1	131	145	15	MYLNPGNYSMQVKLG	0	0	1	1			Shared
NP/M1/M2/NS1/NEP	M1	136	150	15	GNYSMQVKLGTLCAL	0	0	1	1			Shared
NP/M1/M2/NS1/NEP	M1	141	155	15	QVKLGTLCALCEKQA	0	0	1	1			Shared
NP/M1/M2/NS1/NEP	M1	146	160	15	TLCALCEKQASHSHR	0	0	1	1			Shared
NP/M1/M2/NS1/NEP	M1	151	165	15	CEKQASHSHRAHSRA	0	0	1	1			Shared
NP/M1/M2/NS1/NEP	M1	156	170	15	SHSHRAHSRAARSSV	0	0	1	1			Shared
NP/M1/M2/NS1/NEP	M1	161	175	15	AHSRAARSSVPGVRR	0	0	1	1			Shared
NP/M1/M2/NS1/NEP	M1	166	180	15	ARSSVPGVRREMQMV	0	0	1	1			Shared
NP/M1/M2/NS1/NEP	M1	171	185	15	PGVRREMQMVSAMNT	0	0	1	1			Shared
NP/M1/M2/NS1/NEP	M1	191	205	15	GMGKGEDVQKLAEEL	0	0	1	1			Shared
NP/M1/M2/NS1/NEP	M1	196	210	15	EDVQKLAEELQSNIG	0	0	1	1			Shared
NP/M1/M2/NS1/NEP	M1	201	215	15	LAEELQSNIGVLRSL	0	0	1	1			Shared
NP/M1/M2/NS1/NEP	M1	206	220	15	QSNIGVLRSLGASQK	0	0	1	1			Shared
NP/M1/M2/NS1/NEP	M1	211	225	15	VLRSLGASQKNGEGI	0	0	1	1			Shared
NP/M1/M2/NS1/NEP	M1	216	230	15	GASQKNGEGIAKDVM	0	0	1	1			Shared
NP/M1/M2/NS1/NEP	M1	221	235	15	NGEGIAKDVMEVLKQ	0	0	1	1			Shared
NP/M1/M2/NS1/NEP	M1	226	240	15	AKDVMEVLKQSSMGN	0	0	1	1			Shared
NP/M1/M2/NS1/NEP	M1	231	245	15	EVLKQSSMGNSALVK	0	0	1	1			Shared
NP/M1/M2/NS1/NEP	M1	236	248	13	SSMGNSALVKKYL	0	0	1	1			Shared
NP/M1/M2/NS1/NEP	M2	11	25	15	CSFILSALHFMAWTI	0	0	1	1			Shared
NP/M1/M2/NS1/NEP	M2	16	30	15	SALHFMAWTIGHLNQ	0	0	1	1			Shared
NP/M1/M2/NS1/NEP	M2	51	65	15	REVSILRHSYQKEIQ	0	0	1	1			Shared
NP/M1/M2/NS1/NEP	M2	91	105	15	SAEEIIKMGETVLEV	0	0	1	1			Shared
NP/M1/M2/NS1/NEP	NP	6	20	15	TKRSYEQMETDGERQ	1	0	0	0
NP/M1/M2/NS1/NEP	NP	11	25	15	EQMETDGERQNATEI	1	0	0	0
NP/M1/M2/NS1/NEP	NP	16	30	15	DGERQNATEIRASVG	1	0	0	0
NP/M1/M2/NS1/NEP	NP	21	35	15	NATEIRASVGKMIGG	1	0	0	0
NP/M1/M2/NS1/NEP	NP	26	40	15	RASVGKMIGGIGRFY	1	0	0	0
NP/M1/M2/NS1/NEP	NP	31	45	15	KMIGGIGRFYIQMCT	1	0	0	0
NP/M1/M2/NS1/NEP	NP	41	55	15	IQMCTELKLSDYEGR	1	0	0	0
NP/M1/M2/NS1/NEP	NP	46	60	15	ELKLSDYEGRLIQNS	1	0	0	0
NP/M1/M2/NS1/NEP	NP	51	65	15	DYEGRLIQNSLTIER	1	0	0	0
NP/M1/M2/NS1/NEP	NP	56	70	15	LIQNSLTIERMVLSA	1	0	0	0
NP/M1/M2/NS1/NEP	NP	61	75	15	LTIERMVLSAFDERR	1	0	0	0
NP/M1/M2/NS1/NEP	NP	91	105	15	KTGGPIYRRVNGKWM	1	0	0	0
NP/M1/M2/NS1/NEP	NP	96	110	15	IYRRVNGKWMRELIL	1	0	0	0
NP/M1/M2/NS1/NEP	NP	101	115	15	NGKWMRELILYDKEE	1	0	0	0
NP/M1/M2/NS1/NEP	NP	106	120	15	RELILYDKEEIRRIW	1	0	0	0
NP/M1/M2/NS1/NEP	NP	116	130	15	IRRIWRQANNGDDAT	1	0	0	0
NP/M1/M2/NS1/NEP	NP	121	135	15	RQANNGDDATAGLTH	1	0	0	0
NP/M1/M2/NS1/NEP	NP	126	140	15	GDDATAGLTHMMIWH	1	0	0	0
NP/M1/M2/NS1/NEP	NP	131	145	15	AGLTHMMIWHSNLND	1	0	0	0
NP/M1/M2/NS1/NEP	NP	136	150	15	MMIWHSNLNDATYQR	1	0	0	0
NP/M1/M2/NS1/NEP	NP	176	190	15	SGAAGAAVKGVGTMV	1	0	0	0
NP/M1/M2/NS1/NEP	NP	181	195	15	AAVKGVGTMVMELVR	1	0	0	0
NP/M1/M2/NS1/NEP	NP	186	200	15	VGTMVMELVRMIKRG	1	0	0	0
NP/M1/M2/NS1/NEP	NP	191	205	15	MELVRMIKRGINDRN	1	0	0	0
NP/M1/M2/NS1/NEP	NP	196	210	15	MIKRGINDRNFWRGE	1	0	0	0
NP/M1/M2/NS1/NEP	NP	206	220	15	FWRGENGRKTRIAYE	1	0	0	0
NP/M1/M2/NS1/NEP	NP	211	225	15	NGRKTRIAYERMCNI	1	0	0	0
NP/M1/M2/NS1/NEP	NP	216	230	15	RIAYERMCNILKGKF	1	0	0	0
NP/M1/M2/NS1/NEP	NP	226	240	15	LKGKFQTAAQKAMMD	1	0	0	0
NP/M1/M2/NS1/NEP	NP	231	245	15	QTAAQKAMMDQVRES	1	0	0	0
NP/M1/M2/NS1/NEP	NP	236	250	15	KAMMDQVRESRNPGN	1	0	0	0
NP/M1/M2/NS1/NEP	NP	241	255	15	QVRESRNPGNAEFED	1	0	0	0
NP/M1/M2/NS1/NEP	NP	246	260	15	RNPGNAEFEDLTFLA	1	0	0	0
NP/M1/M2/NS1/NEP	NP	251	265	15	AEFEDLTFLARSALI	1	0	0	0
NP/M1/M2/NS1/NEP	NP	256	270	15	LTFLARSALILRGSV	1	0	0	0
NP/M1/M2/NS1/NEP	NP	266	280	15	LRGSVAHKSCLPACV	1	0	0	0
NP/M1/M2/NS1/NEP	NP	271	285	15	AHKSCLPACVYGPAV	1	0	0	0
NP/M1/M2/NS1/NEP	NP	276	290	15	LPACVYGPAVASGYD	1	0	0	0
NP/M1/M2/NS1/NEP	NP	281	295	15	YGPAVASGYDFEREG	1	0	0	0
NP/M1/M2/NS1/NEP	NP	286	300	15	ASGYDFEREGYSLVG	1	0	0	0
NP/M1/M2/NS1/NEP	NP	291	305	15	FEREGYSLVGIDPFR	1	0	0	0
NP/M1/M2/NS1/NEP	NP	296	310	15	YSLVGIDPFRLLQNS	1	0	0	0
NP/M1/M2/NS1/NEP	NP	301	315	15	IDPFRLLQNSQVYSL	1	0	0	0
NP/M1/M2/NS1/NEP	NP	306	320	15	LLQNSQVYSLIRPNE	1	0	0	0
NP/M1/M2/NS1/NEP	NP	311	325	15	QVYSLIRPNENPAHK	1	0	0	0
NP/M1/M2/NS1/NEP	NP	331	345	15	MACHSAAFEDLRVLS	1	0	0	0
NP/M1/M2/NS1/NEP	NP	336	350	15	AAFEDLRVLSFIKGT	1	0	0	0
NP/M1/M2/NS1/NEP	NP	341	355	15	LRVLSFIKGTKVLPR	1	0	0	0
NP/M1/M2/NS1/NEP	NP	346	360	15	FIKGTKVLPRGKLST	1	0	0	0
NP/M1/M2/NS1/NEP	NP	351	365	15	KVLPRGKLSTRGVQI	1	0	0	0
NP/M1/M2/NS1/NEP	NP	361	375	15	RGVQIASNENMETME	1	0	0	0
NP/M1/M2/NS1/NEP	NP	366	380	15	ASNENMETMESSTLE	1	0	0	0
NP/M1/M2/NS1/NEP	NP	371	385	15	METMESSTLELRSRY	1	0	0	0
NP/M1/M2/NS1/NEP	NP	376	390	15	SSTLELRSRYWAIRT	1	0	0	0
NP/M1/M2/NS1/NEP	NP	381	395	15	LRSRYWAIRTRSGGN	1	0	0	0
NP/M1/M2/NS1/NEP	NP	396	410	15	TNQQRASAGQISIQP	1	0	0	0
NP/M1/M2/NS1/NEP	NP	401	415	15	ASAGQISIQPTFSVQ	1	0	0	0
NP/M1/M2/NS1/NEP	NP	406	420	15	ISIQPTFSVQRNLPF	1	0	0	0
NP/M1/M2/NS1/NEP	NP	411	425	15	TFSVQRNLPFDRTTI	1	0	0	0
NP/M1/M2/NS1/NEP	NP	416	430	15	RNLPFDRTTIMAAFN	1	0	0	0
NP/M1/M2/NS1/NEP	NP	421	435	15	DRTTIMAAFNGNTEG	1	0	0	0
NP/M1/M2/NS1/NEP	NP	426	440	15	MAAFNGNTEGRTSDM	1	0	0	0
NP/M1/M2/NS1/NEP	NP	431	445	15	GNTEGRTSDMRTEII	1	0	0	0
NP/M1/M2/NS1/NEP	NP	436	450	15	RTSDMRTEIIRMMES	1	0	0	0
NP/M1/M2/NS1/NEP	NP	441	455	15	RTEIIRMMESARPED	1	0	0	0
NP/M1/M2/NS1/NEP	NP	446	460	15	RMMESARPEDVSFQG	1	0	0	0
NP/M1/M2/NS1/NEP	NP	451	465	15	ARPEDVSFQGRGVFE	1	0	0	0
NP/M1/M2/NS1/NEP	NP	456	470	15	VSFQGRGVFELSDEK	1	0	0	0
NP/M1/M2/NS1/NEP	NP	461	475	15	RGVFELSDEKAASPI	1	0	0	0
NP/M1/M2/NS1/NEP	NP	466	480	15	LSDEKAASPIVPSFD	1	0	0	0
NP/M1/M2/NS1/NEP	NP	471	485	15	AASPIVPSFDMSNEG	1	0	0	0
NP/M1/M2/NS1/NEP	M1	1	15	15	MSLLTEVETYVLSII	1	0	0	0
NP/M1/M2/NS1/NEP	M1	6	20	15	EVETYVLSIIPSGPL	1	0	0	0
NP/M1/M2/NS1/NEP	M1	11	25	15	VLSIIPSGPLKAEIA	1	0	0	0
NP/M1/M2/NS1/NEP	M1	31	45	15	VFAGKNTDLEVLMEW	1	0	0	0
NP/M1/M2/NS1/NEP	M1	36	50	15	NTDLEVLMEWLKTRP	1	0	0	0
NP/M1/M2/NS1/NEP	M1	41	55	15	VLMEWLKTRPILSPL	1	0	0	0
NP/M1/M2/NS1/NEP	M1	106	120	15	EITFHGAKEISLSYS	1	0	0	0
NP/M1/M2/NS1/NEP	M1	111	125	15	GAKEISLSYSAGALA	1	0	0	0
NP/M1/M2/NS1/NEP	M1	116	130	15	SLSYSAGALASCMGL	1	0	0	0
NP/M1/M2/NS1/NEP	M1	156	170	15	DSQHRSHRQMVTTTN	1	0	0	0
NP/M1/M2/NS1/NEP	M1	161	175	15	SHRQMVTTTNPLIRH	1	0	0	0
NP/M1/M2/NS1/NEP	M1	166	180	15	VTTTNPLIRHENRMV	1	0	0	0
NP/M1/M2/NS1/NEP	M1	171	185	15	PLIRHENRMVLASTT	1	0	0	0
NP/M1/M2/NS1/NEP	M1	191	205	15	QMAGSSEQAAEAMEV	1	0	0	0
NP/M1/M2/NS1/NEP	M1	196	210	15	SEQAAEAMEVASQAR	1	0	0	0
NP/M1/M2/NS1/NEP	M1	201	215	15	EAMEVASQARQMVQA	1	0	0	0
NP/M1/M2/NS1/NEP	M1	206	220	15	ASQARQMVQAMRTIG	1	0	0	0
NP/M1/M2/NS1/NEP	M1	211	225	15	QMVQAMRTIGTHPSS	1	0	0	0
NP/M1/M2/NS1/NEP	M1	216	230	15	MRTIGTHPSSSAGLK	1	0	0	0
NP/M1/M2/NS1/NEP	M1	221	235	15	THPSSSAGLKNDLLE	1	0	0	0
NP/M1/M2/NS1/NEP	M1	226	240	15	SAGLKNDLLENLQAY	1	0	0	0
NP/M1/M2/NS1/NEP	M1	231	245	15	NDLLENLQAYQKRMG	1	0	0	0
NP/M1/M2/NS1/NEP	M1	236	250	15	NLQAYQKRMGVQMQR	1	0	0	0
NP/M1/M2/NS1/NEP	M2	11	25	15	IRNEWGCRCNGSSDP	1	0	0	0
NP/M1/M2/NS1/NEP	M2	16	30	15	GCRCNGSSDPLTIAA	1	0	0	0
NP/M1/M2/NS1/NEP	M2	21	35	15	GSSDPLTIAANIIGI	1	0	0	0
NP/M1/M2/NS1/NEP	M2	26	40	15	LTIAANIIGILHLTL	1	0	0	0
NP/M1/M2/NS1/NEP	M2	31	45	15	NIIGILHLTLWILDR	1	0	0	0
NP/M1/M2/NS1/NEP	M2	36	50	15	LHLTLWILDRLFFKC	1	0	0	0
NP/M1/M2/NS1/NEP	M2	41	55	15	WILDRLFFKCIYRRF	1	0	0	0
NP/M1/M2/NS1/NEP	M2	46	60	15	LFFKCIYRRFKYGLK	1	0	0	0
NP/M1/M2/NS1/NEP	M2	51	65	15	IYRRFKYGLKGGPST	1	0	0	0
NP/M1/M2/NS1/NEP	M2	56	70	15	KYGLKGGPSTEGVPK	1	0	0	0
NP/M1/M2/NS1/NEP	M2	61	75	15	GGPSTEGVPKSMREE	1	0	0	0
NP/M1/M2/NS1/NEP	M2	66	80	15	EGVPKSMREEYRKEQ	1	0	0	0
NP/M1/M2/NS1/NEP	M2	71	85	15	SMREEYRKEQQSAVD	1	0	0	0
NP/M1/M2/NS1/NEP	M2	76	90	15	YRKEQQSAVDADDGH	1	0	0	0
NP/M1/M2/NS1/NEP	M2	81	95	15	QSAVDADDGHFVSIE	1	0	0	0
NP/M1/M2/NS1/NEP	M2	86	97	12	ADDGHFVSIELE	1	0	0	0
NP/M1/M2/NS1/NEP	NS1	1	15	15	MDPNTVSSFQVDCFL	1	0	0	0
NP/M1/M2/NS1/NEP	NS1	6	20	15	VSSFQVDCFLWHVRK	1	0	0	0
NP/M1/M2/NS1/NEP	NS1	11	25	15	VDCFLWHVRKRVADQ	1	0	0	0
NP/M1/M2/NS1/NEP	NS1	16	30	15	WHVRKRVADQELGDA	1	0	0	0
NP/M1/M2/NS1/NEP	NS1	21	35	15	RVADQELGDAPFLDR	1	0	0	0
NP/M1/M2/NS1/NEP	NS1	26	40	15	ELGDAPFLDRLRRDQ	1	0	0	0
NP/M1/M2/NS1/NEP	NS1	31	45	15	PFLDRLRRDQKSLRG	1	0	0	0
NP/M1/M2/NS1/NEP	NS1	36	50	15	LRRDQKSLRGRGSTL	1	0	0	0
NP/M1/M2/NS1/NEP	NS1	41	55	15	KSLRGRGSTLGLDIK	1	0	0	0
NP/M1/M2/NS1/NEP	NS1	46	60	15	RGSTLGLDIKTATRA	1	0	0	0
NP/M1/M2/NS1/NEP	NS1	51	65	15	GLDIKTATRAGKQIV	1	0	0	0
NP/M1/M2/NS1/NEP	NS1	56	70	15	TATRAGKQIVERILK	1	0	0	0
NP/M1/M2/NS1/NEP	NS1	61	75	15	GKQIVERILKEESDE	1	0	0	0
NP/M1/M2/NS1/NEP	NS1	66	80	15	ERILKEESDEALKMT	1	0	0	0
NP/M1/M2/NS1/NEP	NS1	71	85	15	EESDEALKMTMASVP	1	0	0	0
NP/M1/M2/NS1/NEP	NS1	76	90	15	ALKMTMASVPASRYL	1	0	0	0
NP/M1/M2/NS1/NEP	NS1	81	95	15	MASVPASRYLTDMTL	1	0	0	0
NP/M1/M2/NS1/NEP	NS1	86	100	15	ASRYLTDMTLEEMSR	1	0	0	0
NP/M1/M2/NS1/NEP	NS1	91	105	15	TDMTLEEMSRDWSML	1	0	0	0
NP/M1/M2/NS1/NEP	NS1	96	110	15	EEMSRDWSMLIPKQK	1	0	0	0
NP/M1/M2/NS1/NEP	NS1	101	115	15	DWSMLIPKQKVAGPL	1	0	0	0
NP/M1/M2/NS1/NEP	NS1	106	120	15	IPKQKVAGPLCIRMD	1	0	0	0
NP/M1/M2/NS1/NEP	NS1	111	125	15	VAGPLCIRMDQAIMD	1	0	0	0
NP/M1/M2/NS1/NEP	NS1	116	130	15	CIRMDQAIMDKNIIL	1	0	0	0
NP/M1/M2/NS1/NEP	NS1	121	135	15	QAIMDKNIILKANFS	1	0	0	0
NP/M1/M2/NS1/NEP	NS1	126	140	15	KNIILKANFSVIFDR	1	0	0	0
NP/M1/M2/NS1/NEP	NS1	131	145	15	KANFSVIFDRLETLI	1	0	0	0
NP/M1/M2/NS1/NEP	NS1	136	150	15	VIFDRLETLILLRAF	1	0	0	0
NP/M1/M2/NS1/NEP	NS1	141	155	15	LETLILLRAFTEEGA	1	0	0	0
NP/M1/M2/NS1/NEP	NS1	156	170	15	IVGEISPLPSLPGHT	1	0	0	0
NP/M1/M2/NS1/NEP	NS1	161	175	15	SPLPSLPGHTAEDVK	1	0	0	0
NP/M1/M2/NS1/NEP	NS1	166	180	15	LPGHTAEDVKNAVGV	1	0	0	0
NP/M1/M2/NS1/NEP	NS1	171	185	15	AEDVKNAVGVLIGGL	1	0	0	0
NP/M1/M2/NS1/NEP	NS1	176	190	15	NAVGVLIGGLEWNDN	1	0	0	0
NP/M1/M2/NS1/NEP	NS1	186	200	15	EWNDNTVRVSETLQR	1	0	0	0
NP/M1/M2/NS1/NEP	NS1	191	205	15	TVRVSETLQRFAWRS	1	0	0	0
NP/M1/M2/NS1/NEP	NS1	196	210	15	ETLQRFAWRSSNENG	1	0	0	0
NP/M1/M2/NS1/NEP	NS1	201	215	15	FAWRSSNENGRPPLT	1	0	0	0
NP/M1/M2/NS1/NEP	NS1	206	220	15	SNENGRPPLTPKQKR	1	0	0	0
NP/M1/M2/NS1/NEP	NS1	211	225	15	RPPLTPKQKREMAGT	1	0	0	0
NP/M1/M2/NS1/NEP	NS1	216	230	15	PKQKREMAGTIRSEV	1	0	0	0
NP/M1/M2/NS1/NEP	NEP	1	15	15	MDPNTVSSFQDILLR	1	0	0	0
NP/M1/M2/NS1/NEP	NEP	11	25	15	DILLRMSKMQLESSS	1	0	0	0
NP/M1/M2/NS1/NEP	NEP	16	30	15	MSKMQLESSSEDLNG	1	0	0	0
NP/M1/M2/NS1/NEP	NEP	21	35	15	LESSSEDLNGMITQF	1	0	0	0
NP/M1/M2/NS1/NEP	NEP	26	40	15	EDLNGMITQFESLKL	1	0	0	0
NP/M1/M2/NS1/NEP	NEP	31	45	15	MITQFESLKLYRDSL	1	0	0	0
NP/M1/M2/NS1/NEP	NEP	36	50	15	ESLKLYRDSLGEAVM	1	0	0	0
NP/M1/M2/NS1/NEP	NEP	46	60	15	GEAVMRMGDLHSLQN	1	0	0	0
NP/M1/M2/NS1/NEP	NEP	51	65	15	RMGDLHSLQNRNEKW	1	0	0	0
NP/M1/M2/NS1/NEP	NEP	56	70	15	HSLQNRNEKWREQLG	1	0	0	0
NP/M1/M2/NS1/NEP	NEP	61	75	15	RNEKWREQLGQKFEE	1	0	0	0
NP/M1/M2/NS1/NEP	NEP	76	90	15	IRWLIEEVRHKLKIT	1	0	0	0
NP/M1/M2/NS1/NEP	NEP	81	95	15	EEVRHKLKITENSFE	1	0	0	0
NP/M1/M2/NS1/NEP	NEP	86	100	15	KLKITENSFEQITFM	1	0	0	0
NP/M1/M2/NS1/NEP	NEP	91	105	15	ENSFEQITFMQALHL	1	0	0	0
NP/M1/M2/NS1/NEP	NEP	96	110	15	QITFMQALHLLLEVE	1	0	0	0
NP/M1/M2/NS1/NEP	NEP	101	115	15	QALHLLLEVEQEIRT	1	0	0	0
NP/M1/M2/NS1/NEP	NEP	106	120	15	LLEVEQEIRTFSFQL	1	0	0	0
NP/M1/M2/NS1/NEP	NP	6	20	15	TKRSYEQMETDGDRQ	0	1	0	0
NP/M1/M2/NS1/NEP	NP	11	25	15	EQMETDGDRQNATEI	0	1	0	0
NP/M1/M2/NS1/NEP	NP	16	30	15	DGDRQNATEIRASVG	0	1	0	0
NP/M1/M2/NS1/NEP	NP	21	35	15	NATEIRASVGKMIDG	0	1	0	0
NP/M1/M2/NS1/NEP	NP	26	40	15	RASVGKMIDGIGRFY	0	1	0	0
NP/M1/M2/NS1/NEP	NP	31	45	15	KMIDGIGRFYIQMCT	0	1	0	0
NP/M1/M2/NS1/NEP	NP	41	55	15	IQMCTELKLSDHEGR	0	1	0	0
NP/M1/M2/NS1/NEP	NP	46	60	15	ELKLSDHEGRLIQNS	0	1	0	0
NP/M1/M2/NS1/NEP	NP	51	65	15	DHEGRLIQNSLTIEK	0	1	0	0
NP/M1/M2/NS1/NEP	NP	56	70	15	LIQNSLTIEKMVLSA	0	1	0	0
NP/M1/M2/NS1/NEP	NP	61	75	15	LTIEKMVLSAFDERR	0	1	0	0
NP/M1/M2/NS1/NEP	NP	91	105	15	KTGGPIYRRVDGKWM	0	1	0	0
NP/M1/M2/NS1/NEP	NP	96	110	15	IYRRVDGKWMRELVL	0	1	0	0
NP/M1/M2/NS1/NEP	NP	101	115	15	DGKWMRELVLYDKEE	0	1	0	0
NP/M1/M2/NS1/NEP	NP	106	120	15	RELVLYDKEEIRRIW	0	1	0	0
NP/M1/M2/NS1/NEP	NP	116	130	15	IRRIWRQANNGEDAT	0	1	0	0
NP/M1/M2/NS1/NEP	NP	121	135	15	RQANNGEDATSGLTH	0	1	0	0
NP/M1/M2/NS1/NEP	NP	126	140	15	GEDATSGLTHIMIWH	0	1	0	0
NP/M1/M2/NS1/NEP	NP	131	145	15	SGLTHIMIWHSNLND	0	1	0	0
NP/M1/M2/NS1/NEP	NP	136	150	15	IMIWHSNLNDATYQR	0	1	0	0
NP/M1/M2/NS1/NEP	NP	176	190	15	SGAAGAAVKGIGTMV	0	1	0	0
NP/M1/M2/NS1/NEP	NP	181	195	15	AAVKGIGTMVMELIR	0	1	0	0
NP/M1/M2/NS1/NEP	NP	186	200	15	IGTMVMELIRMVKRG	0	1	0	0
NP/M1/M2/NS1/NEP	NP	191	205	15	MELIRMVKRGINDRN	0	1	0	0
NP/M1/M2/NS1/NEP	NP	196	210	15	MVKRGINDRNFWRGE	0	1	0	0
NP/M1/M2/NS1/NEP	NP	206	220	15	FWRGENGRKTRSAYE	0	1	0	0
NP/M1/M2/NS1/NEP	NP	211	225	15	NGRKTRSAYERMCNI	0	1	0	0
NP/M1/M2/NS1/NEP	NP	216	230	15	RSAYERMCNILKGKF	0	1	0	0
NP/M1/M2/NS1/NEP	NP	226	240	15	LKGKFQTAAQRAMVD	0	1	0	0
NP/M1/M2/NS1/NEP	NP	231	245	15	QTAAQRAMVDQVRES	0	1	0	0
NP/M1/M2/NS1/NEP	NP	236	250	15	RAMVDQVRESRNPGN	0	1	0	0
NP/M1/M2/NS1/NEP	NP	241	255	15	QVRESRNPGNAEIED	0	1	0	0
NP/M1/M2/NS1/NEP	NP	246	260	15	RNPGNAEIEDLMFLA	0	1	0	0
NP/M1/M2/NS1/NEP	NP	251	265	15	AEIEDLMFLARSALI	0	1	0	0
NP/M1/M2/NS1/NEP	NP	256	270	15	LMFLARSALILRGSV	0	1	0	0
NP/M1/M2/NS1/NEP	NP	266	280	15	LRGSVAHKSCLPACA	0	1	0	0
NP/M1/M2/NS1/NEP	NP	271	285	15	AHKSCLPACAYGPAV	0	1	0	0
NP/M1/M2/NS1/NEP	NP	276	290	15	LPACAYGPAVSSGYD	0	1	0	0
NP/M1/M2/NS1/NEP	NP	281	295	15	YGPAVSSGYDFEKEG	0	1	0	0
NP/M1/M2/NS1/NEP	NP	286	300	15	SSGYDFEKEGYSLVG	0	1	0	0
NP/M1/M2/NS1/NEP	NP	291	305	15	FEKEGYSLVGIDPFK	0	1	0	0
NP/M1/M2/NS1/NEP	NP	296	310	15	YSLVGIDPFKLLQNS	0	1	0	0
NP/M1/M2/NS1/NEP	NP	301	315	15	IDPFKLLQNSQIYSL	0	1	0	0
NP/M1/M2/NS1/NEP	NP	306	320	15	LLQNSQIYSLIRPNE	0	1	0	0
NP/M1/M2/NS1/NEP	NP	311	325	15	QIYSLIRPNENPAHK	0	1	0	0
NP/M1/M2/NS1/NEP	NP	331	345	15	MACHSAAFEDLRLLS	0	1	0	0
NP/M1/M2/NS1/NEP	NP	336	350	15	AAFEDLRLLSFIRGT	0	1	0	0
NP/M1/M2/NS1/NEP	NP	341	355	15	LRLLSFIRGTKVSPR	0	1	0	0
NP/M1/M2/NS1/NEP	NP	346	360	15	FIRGTKVSPRGKLST	0	1	0	0
NP/M1/M2/NS1/NEP	NP	351	365	15	KVSPRGKLSTRGVQI	0	1	0	0
NP/M1/M2/NS1/NEP	NP	361	375	15	RGVQIASNENMDNMG	0	1	0	0
NP/M1/M2/NS1/NEP	NP	366	380	15	ASNENMDNMGSSTLE	0	1	0	0
NP/M1/M2/NS1/NEP	NP	371	385	15	MDNMGSSTLELRSGY	0	1	0	0
NP/M1/M2/NS1/NEP	NP	376	390	15	SSTLELRSGYWAIRT	0	1	0	0
NP/M1/M2/NS1/NEP	NP	381	395	15	LRSGYWAIRTRSGGN	0	1	0	0
NP/M1/M2/NS1/NEP	NP	396	410	15	TNQQRASAGQTSVQP	0	1	0	0
NP/M1/M2/NS1/NEP	NP	401	415	15	ASAGQTSVQPTFSVQ	0	1	0	0
NP/M1/M2/NS1/NEP	NP	406	420	15	TSVQPTFSVQRNLPF	0	1	0	0
NP/M1/M2/NS1/NEP	NP	411	425	15	TFSVQRNLPFEKSTI	0	1	0	0
NP/M1/M2/NS1/NEP	NP	416	430	15	RNLPFEKSTIMAAFT	0	1	0	0
NP/M1/M2/NS1/NEP	NP	421	435	15	EKSTIMAAFTGNTEG	0	1	0	0
NP/M1/M2/NS1/NEP	NP	426	440	15	MAAFTGNTEGRTSDM	0	1	0	0
NP/M1/M2/NS1/NEP	NP	431	445	15	GNTEGRTSDMRAEII	0	1	0	0
NP/M1/M2/NS1/NEP	NP	436	450	15	RTSDMRAEIIRMMEG	0	1	0	0
NP/M1/M2/NS1/NEP	NP	441	455	15	RAEIIRMMEGAKPEE	0	1	0	0
NP/M1/M2/NS1/NEP	NP	446	460	15	RMMEGAKPEEVSFRG	0	1	0	0
NP/M1/M2/NS1/NEP	NP	451	465	15	AKPEEVSFRGRGVFE	0	1	0	0
NP/M1/M2/NS1/NEP	NP	456	470	15	VSFRGRGVFELSDEK	0	1	0	0
NP/M1/M2/NS1/NEP	NP	461	475	15	RGVFELSDEKAANPI	0	1	0	0
NP/M1/M2/NS1/NEP	NP	466	480	15	LSDEKAANPIVPSFD	0	1	0	0
NP/M1/M2/NS1/NEP	NP	471	485	15	AANPIVPSFDMSNEG	0	1	0	0
NP/M1/M2/NS1/NEP	M1	1	15	15	MSLLTEVETYVLSIV	0	1	0	0
NP/M1/M2/NS1/NEP	M1	6	20	15	EVETYVLSIVPSGPL	0	1	0	0
NP/M1/M2/NS1/NEP	M1	11	25	15	VLSIVPSGPLKAEIA	0	1	0	0
NP/M1/M2/NS1/NEP	M1	31	45	15	VFAGKNTDLEALMEW	0	1	0	0
NP/M1/M2/NS1/NEP	M1	36	50	15	NTDLEALMEWLKTRP	0	1	0	0
NP/M1/M2/NS1/NEP	M1	41	55	15	ALMEWLKTRPILSPL	0	1	0	0
NP/M1/M2/NS1/NEP	M1	106	120	15	EITFHGAKEIALSYS	0	1	0	0
NP/M1/M2/NS1/NEP	M1	111	125	15	GAKEIALSYSAGALA	0	1	0	0
NP/M1/M2/NS1/NEP	M1	116	130	15	ALSYSAGALASCMGL	0	1	0	0
NP/M1/M2/NS1/NEP	M1	156	170	15	DSQHRSHRQMVATTN	0	1	0	0
NP/M1/M2/NS1/NEP	M1	161	175	15	SHRQMVATTNPLIKH	0	1	0	0
NP/M1/M2/NS1/NEP	M1	166	180	15	VATTNPLIKHENRMV	0	1	0	0
NP/M1/M2/NS1/NEP	M1	171	185	15	PLIKHENRMVLASTT	0	1	0	0
NP/M1/M2/NS1/NEP	M1	191	205	15	QMAGSSEQAAEAMEI	0	1	0	0
NP/M1/M2/NS1/NEP	M1	196	210	15	SEQAAEAMEIASQAR	0	1	0	0
NP/M1/M2/NS1/NEP	M1	201	215	15	EAMEIASQARQMVQA	0	1	0	0
NP/M1/M2/NS1/NEP	M1	206	220	15	ASQARQMVQAMRAIG	0	1	0	0
NP/M1/M2/NS1/NEP	M1	211	225	15	QMVQAMRAIGTHPSS	0	1	0	0
NP/M1/M2/NS1/NEP	M1	216	230	15	MRAIGTHPSSSTGLR	0	1	0	0
NP/M1/M2/NS1/NEP	M1	221	235	15	THPSSSTGLRDDLLE	0	1	0	0
NP/M1/M2/NS1/NEP	M1	226	240	15	STGLRDDLLENLQTY	0	1	0	0
NP/M1/M2/NS1/NEP	M1	231	245	15	DDLLENLQTYQKRMG	0	1	0	0
NP/M1/M2/NS1/NEP	M1	236	250	15	NLQTYQKRMGVQMQR	0	1	0	0
NP/M1/M2/NS1/NEP	M2	11	25	15	IRNEWGCRCNDSSDP	0	1	0	0
NP/M1/M2/NS1/NEP	M2	16	30	15	GCRCNDSSDPLVVAA	0	1	0	0
NP/M1/M2/NS1/NEP	M2	21	35	15	DSSDPLVVAANIIGI	0	1	0	0
NP/M1/M2/NS1/NEP	M2	26	40	15	LVVAANIIGILHLIL	0	1	0	0
NP/M1/M2/NS1/NEP	M2	31	45	15	NIIGILHLILWILDR	0	1	0	0
NP/M1/M2/NS1/NEP	M2	36	50	15	LHLILWILDRLFFKC	0	1	0	0
NP/M1/M2/NS1/NEP	M2	41	55	15	WILDRLFFKCVYRLF	0	1	0	0
NP/M1/M2/NS1/NEP	M2	46	60	15	LFFKCVYRLFKHGLK	0	1	0	0
NP/M1/M2/NS1/NEP	M2	51	65	15	VYRLFKHGLKRGPST	0	1	0	0
NP/M1/M2/NS1/NEP	M2	56	70	15	KHGLKRGPSTEGVPE	0	1	0	0
NP/M1/M2/NS1/NEP	M2	61	75	15	RGPSTEGVPESMREE	0	1	0	0
NP/M1/M2/NS1/NEP	M2	66	80	15	EGVPESMREEYRKEQ	0	1	0	0
NP/M1/M2/NS1/NEP	M2	71	85	15	SMREEYRKEQQNAVD	0	1	0	0
NP/M1/M2/NS1/NEP	M2	76	90	15	YRKEQQNAVDADDSH	0	1	0	0
NP/M1/M2/NS1/NEP	M2	81	95	15	QNAVDADDSHFVSIE	0	1	0	0
NP/M1/M2/NS1/NEP	M2	86	97	12	ADDSHFVSIELE	0	1	0	0
NP/M1/M2/NS1/NEP	NS1	1	15	15	MDSNTVSSFQVDCFL	0	1	0	0
NP/M1/M2/NS1/NEP	NS1	6	20	15	VSSFQVDCFLWHIRK	0	1	0	0
NP/M1/M2/NS1/NEP	NS1	11	25	15	VDCFLWHIRKQVVDQ	0	1	0	0
NP/M1/M2/NS1/NEP	NS1	16	30	15	WHIRKQVVDQKLSDA	0	1	0	0
NP/M1/M2/NS1/NEP	NS1	21	35	15	QVVDQKLSDAPFLDR	0	1	0	0
NP/M1/M2/NS1/NEP	NS1	26	40	15	KLSDAPFLDRLRRDQ	0	1	0	0
NP/M1/M2/NS1/NEP	NS1	31	45	15	PFLDRLRRDQRSLRG	0	1	0	0
NP/M1/M2/NS1/NEP	NS1	36	50	15	LRRDQRSLRGRGNTL	0	1	0	0
NP/M1/M2/NS1/NEP	NS1	41	55	15	RSLRGRGNTLGLDIK	0	1	0	0
NP/M1/M2/NS1/NEP	NS1	46	60	15	RGNTLGLDIKSATHV	0	1	0	0
NP/M1/M2/NS1/NEP	NS1	51	65	15	GLDIKSATHVGKQIV	0	1	0	0
NP/M1/M2/NS1/NEP	NS1	56	70	15	SATHVGKQIVEKILK	0	1	0	0
NP/M1/M2/NS1/NEP	NS1	61	75	15	GKQIVEKILKGESDE	0	1	0	0
NP/M1/M2/NS1/NEP	NS1	66	80	15	EKILKGESDEALKMT	0	1	0	0
NP/M1/M2/NS1/NEP	NS1	71	85	15	GESDEALKMTMVSTP	0	1	0	0
NP/M1/M2/NS1/NEP	NS1	76	90	15	ALKMTMVSTPASRYI	0	1	0	0
NP/M1/M2/NS1/NEP	NS1	81	95	15	MVSTPASRYITDMTI	0	1	0	0
NP/M1/M2/NS1/NEP	NS1	86	100	15	ASRYITDMTIEELSR	0	1	0	0
NP/M1/M2/NS1/NEP	NS1	91	105	15	TDMTIEELSRNWFML	0	1	0	0
NP/M1/M2/NS1/NEP	NS1	96	110	15	EELSRNWFMLMPKQK	0	1	0	0
NP/M1/M2/NS1/NEP	NS1	101	115	15	NWFMLMPKQKVEGPL	0	1	0	0
NP/M1/M2/NS1/NEP	NS1	106	120	15	MPKQKVEGPLCIRMD	0	1	0	0
NP/M1/M2/NS1/NEP	NS1	111	125	15	VEGPLCIRMDQAIME	0	1	0	0
NP/M1/M2/NS1/NEP	NS1	116	130	15	CIRMDQAIMEKNIML	0	1	0	0
NP/M1/M2/NS1/NEP	NS1	121	135	15	QAIMEKNIMLKANFN	0	1	0	0
NP/M1/M2/NS1/NEP	NS1	126	140	15	KNIMLKANFNVIFGR	0	1	0	0
NP/M1/M2/NS1/NEP	NS1	131	145	15	KANFNVIFGRLETIV	0	1	0	0
NP/M1/M2/NS1/NEP	NS1	136	150	15	VIFGRLETIVLLRAF	0	1	0	0
NP/M1/M2/NS1/NEP	NS1	141	155	15	LETIVLLRAFTEEGA	0	1	0	0
NP/M1/M2/NS1/NEP	NS1	156	170	15	IVGEISPLPSFPGHT	0	1	0	0
NP/M1/M2/NS1/NEP	NS1	161	175	15	SPLPSFPGHTIEDVK	0	1	0	0
NP/M1/M2/NS1/NEP	NS1	166	180	15	FPGHTIEDVKNAIGV	0	1	0	0
NP/M1/M2/NS1/NEP	NS1	171	185	15	IEDVKNAIGVLIGGL	0	1	0	0
NP/M1/M2/NS1/NEP	NS1	176	190	15	NAIGVLIGGLEWNDN	0	1	0	0
NP/M1/M2/NS1/NEP	NS1	186	200	15	EWNDNTVRVSKNLQR	0	1	0	0
NP/M1/M2/NS1/NEP	NS1	191	205	15	TVRVSKNLQRFAWRS	0	1	0	0
NP/M1/M2/NS1/NEP	NS1	196	210	15	KNLQRFAWRSSNENG	0	1	0	0
NP/M1/M2/NS1/NEP	NS1	201	215	15	FAWRSSNENGGPPLT	0	1	0	0
NP/M1/M2/NS1/NEP	NS1	206	220	15	SNENGGPPLTPKQKR	0	1	0	0
NP/M1/M2/NS1/NEP	NS1	211	225	15	GPPLTPKQKREMART	0	1	0	0
NP/M1/M2/NS1/NEP	NS1	216	230	15	PKQKREMARTARSEV	0	1	0	0
NP/M1/M2/NS1/NEP	NEP	1	15	15	MDSNTVSSFQDILLR	0	1	0	0
NP/M1/M2/NS1/NEP	NEP	11	25	15	DILLRMSKMQLGSSS	0	1	0	0
NP/M1/M2/NS1/NEP	NEP	16	30	15	MSKMQLGSSSEDLNG	0	1	0	0
NP/M1/M2/NS1/NEP	NEP	21	35	15	LGSSSEDLNGMITQF	0	1	0	0
NP/M1/M2/NS1/NEP	NEP	26	40	15	EDLNGMITQFESLKI	0	1	0	0
NP/M1/M2/NS1/NEP	NEP	31	45	15	MITQFESLKIYRDSL	0	1	0	0
NP/M1/M2/NS1/NEP	NEP	36	50	15	ESLKIYRDSLGEAVM	0	1	0	0
NP/M1/M2/NS1/NEP	NEP	46	60	15	GEAVMRMGDLHLLQN	0	1	0	0
NP/M1/M2/NS1/NEP	NEP	51	65	15	RMGDLHLLQNRNGKW	0	1	0	0
NP/M1/M2/NS1/NEP	NEP	56	70	15	HLLQNRNGKWREQLG	0	1	0	0
NP/M1/M2/NS1/NEP	NEP	61	75	15	RNGKWREQLGQKFEE	0	1	0	0
NP/M1/M2/NS1/NEP	NEP	76	90	15	IRWLIEEVRHRLRTT	0	1	0	0
NP/M1/M2/NS1/NEP	NEP	81	95	15	EEVRHRLRTTENSFE	0	1	0	0
NP/M1/M2/NS1/NEP	NEP	86	100	15	RLRTTENSFEQITFM	0	1	0	0
NP/M1/M2/NS1/NEP	NEP	91	105	15	ENSFEQITFMQALQL	0	1	0	0
NP/M1/M2/NS1/NEP	NEP	96	110	15	QITFMQALQLLFEVE	0	1	0	0
NP/M1/M2/NS1/NEP	NEP	101	115	15	QALQLLFEVEQEIRT	0	1	0	0
NP/M1/M2/NS1/NEP	NEP	106	120	15	LFEVEQEIRTFSFQL	0	1	0	0
NP/M1/M2/NS1/NEP	NP	1	15	15	MSNMDIDGMNTGTID	0	0	1	0
NP/M1/M2/NS1/NEP	NP	6	20	15	IDGMNTGTIDKTPEE	0	0	1	0
NP/M1/M2/NS1/NEP	NP	56	70	15	TSSEDDVGRKAQKKQ	0	0	1	0
NP/M1/M2/NS1/NEP	NP	61	75	15	DVGRKAQKKQTPTEI	0	0	1	0
NP/M1/M2/NS1/NEP	NP	66	80	15	AQKKQTPTEIKKSVY	0	0	1	0
NP/M1/M2/NS1/NEP	NP	101	115	15	DDMERNLIQNAHAVE	0	0	1	0
NP/M1/M2/NS1/NEP	NP	106	120	15	NLIQNAHAVERILLA	0	0	1	0
NP/M1/M2/NS1/NEP	NP	111	125	15	AHAVERILLAATDDK	0	0	1	0
NP/M1/M2/NS1/NEP	NP	441	455	15	FWAPMTRSGGNEVGG	0	0	1	0
NP/M1/M2/NS1/NEP	NP	446	460	15	TRSGGNEVGGDGGSG	0	0	1	0
NP/M1/M2/NS1/NEP	NP	451	465	15	NEVGGDGGSGQISCS	0	0	1	0
NP/M1/M2/NS1/NEP	M1	91	105	15	TKKKGLILAERKMRR	0	0	1	0
NP/M1/M2/NS1/NEP	M1	96	110	15	LILAERKMRRCVSFH	0	0	1	0
NP/M1/M2/NS1/NEP	M1	101	115	15	RKMRRCVSFHEAFEI	0	0	1	0
NP/M1/M2/NS1/NEP	M1	176	190	15	EMQMVSAMNTAKTMN	0	0	1	0
NP/M1/M2/NS1/NEP	M1	181	195	15	SAMNTAKTMNGMGKG	0	0	1	0
NP/M1/M2/NS1/NEP	M1	186	200	15	AKTMNGMGKGEDVQK	0	0	1	0
NP/M1/M2/NS1/NEP	M2	1	15	15	MLEPFQILTICSFIL	0	0	1	0
NP/M1/M2/NS1/NEP	M2	6	20	15	QILTICSFILSALHF	0	0	1	0
NP/M1/M2/NS1/NEP	M2	21	35	15	MAWTIGHLNQIKRGI	0	0	1	0
NP/M1/M2/NS1/NEP	M2	26	40	15	GHLNQIKRGINMKIR	0	0	1	0
NP/M1/M2/NS1/NEP	M2	31	45	15	IKRGINMKIRIKGPN	0	0	1	0
NP/M1/M2/NS1/NEP	M2	36	50	15	NMKIRIKGPNKETIT	0	0	1	0
NP/M1/M2/NS1/NEP	M2	41	55	15	IKGPNKETITREVSI	0	0	1	0
NP/M1/M2/NS1/NEP	M2	46	60	15	KETITREVSILRHSY	0	0	1	0
NP/M1/M2/NS1/NEP	M2	56	70	15	LRHSYQKEIQAKETM	0	0	1	0
NP/M1/M2/NS1/NEP	M2	61	75	15	QKEIQAKETMKEVLS	0	0	1	0
NP/M1/M2/NS1/NEP	M2	66	80	15	AKETMKEVLSDNMEV	0	0	1	0
NP/M1/M2/NS1/NEP	M2	71	85	15	KEVLSDNMEVLNDHI	0	0	1	0
NP/M1/M2/NS1/NEP	M2	76	90	15	DNMEVLNDHIIIEGL	0	0	1	0
NP/M1/M2/NS1/NEP	M2	81	95	15	LNDHIIIEGLSAEEI	0	0	1	0
NP/M1/M2/NS1/NEP	M2	86	100	15	IIEGLSAEEIIKMGE	0	0	1	0
NP/M1/M2/NS1/NEP	M2	96	109	14	IKMGETVLEVEELH	0	0	1	0
NP/M1/M2/NS1/NEP	NS1	1	15	15	MANNNMTTTQIEVGP	0	0	1	0
NP/M1/M2/NS1/NEP	NS1	6	20	15	MTTTQIEVGPGATNA	0	0	1	0
NP/M1/M2/NS1/NEP	NS1	11	25	15	IEVGPGATNATINFE	0	0	1	0
NP/M1/M2/NS1/NEP	NS1	16	30	15	GATNATINFEAGILE	0	0	1	0
NP/M1/M2/NS1/NEP	NS1	21	35	15	TINFEAGILECYERL	0	0	1	0
NP/M1/M2/NS1/NEP	NS1	26	40	15	AGILECYERLSWQRA	0	0	1	0
NP/M1/M2/NS1/NEP	NS1	31	45	15	CYERLSWQRALDYPG	0	0	1	0
NP/M1/M2/NS1/NEP	NS1	36	50	15	SWQRALDYPGQDRLN	0	0	1	0
NP/M1/M2/NS1/NEP	NS1	41	55	15	LDYPGQDRLNRLKRK	0	0	1	0
NP/M1/M2/NS1/NEP	NS1	46	60	15	QDRLNRLKRKLESRI	0	0	1	0
NP/M1/M2/NS1/NEP	NS1	51	65	15	RLKRKLESRIKTHNK	0	0	1	0
NP/M1/M2/NS1/NEP	NS1	56	70	15	LESRIKTHNKSEPES	0	0	1	0
NP/M1/M2/NS1/NEP	NS1	61	75	15	KTHNKSEPESKRMSL	0	0	1	0
NP/M1/M2/NS1/NEP	NS1	66	80	15	SEPESKRMSLEERKA	0	0	1	0
NP/M1/M2/NS1/NEP	NS1	71	85	15	KRMSLEERKAIGVKM	0	0	1	0
NP/M1/M2/NS1/NEP	NS1	76	90	15	EERKAIGVKMMKVLL	0	0	1	0
NP/M1/M2/NS1/NEP	NS1	81	95	15	IGVKMMKVLLFMNPS	0	0	1	0
NP/M1/M2/NS1/NEP	NS1	86	100	15	MKVLLFMNPSAGIEG	0	0	1	0
NP/M1/M2/NS1/NEP	NS1	91	105	15	FMNPSAGIEGFEPYC	0	0	1	0
NP/M1/M2/NS1/NEP	NS1	96	110	15	AGIEGFEPYCMNSSS	0	0	1	0
NP/M1/M2/NS1/NEP	NS1	101	115	15	FEPYCMNSSSNSNCT	0	0	1	0
NP/M1/M2/NS1/NEP	NS1	106	120	15	MNSSSNSNCTKYNWT	0	0	1	0
NP/M1/M2/NS1/NEP	NS1	111	125	15	NSNCTKYNWTDYPST	0	0	1	0
NP/M1/M2/NS1/NEP	NS1	116	130	15	KYNWTDYPSTPERCL	0	0	1	0
NP/M1/M2/NS1/NEP	NS1	121	135	15	DYPSTPERCLDDIEE	0	0	1	0
NP/M1/M2/NS1/NEP	NS1	126	140	15	PERCLDDIEEEPEDV	0	0	1	0
NP/M1/M2/NS1/NEP	NS1	131	145	15	DDIEEEPEDVDGPTE	0	0	1	0
NP/M1/M2/NS1/NEP	NS1	136	150	15	EPEDVDGPTEIVLRD	0	0	1	0
NP/M1/M2/NS1/NEP	NS1	141	155	15	DGPTEIVLRDMNNKD	0	0	1	0
NP/M1/M2/NS1/NEP	NS1	146	160	15	IVLRDMNNKDARQKI	0	0	1	0
NP/M1/M2/NS1/NEP	NS1	151	165	15	MNNKDARQKIKEEVN	0	0	1	0
NP/M1/M2/NS1/NEP	NS1	156	170	15	ARQKIKEEVNTQKEG	0	0	1	0
NP/M1/M2/NS1/NEP	NS1	161	175	15	KEEVNTQKEGKFRLT	0	0	1	0
NP/M1/M2/NS1/NEP	NS1	166	180	15	TQKEGKFRLTIKRDM	0	0	1	0
NP/M1/M2/NS1/NEP	NS1	171	185	15	KFRLTIKRDMRNVLS	0	0	1	0
NP/M1/M2/NS1/NEP	NS1	176	190	15	IKRDMRNVLSLRVLV	0	0	1	0
NP/M1/M2/NS1/NEP	NS1	181	195	15	RNVLSLRVLVNGTFL	0	0	1	0
NP/M1/M2/NS1/NEP	NS1	186	200	15	LRVLVNGTFLKHPNG	0	0	1	0
NP/M1/M2/NS1/NEP	NS1	191	205	15	NGTFLKHPNGYKSLS	0	0	1	0
NP/M1/M2/NS1/NEP	NS1	196	210	15	KHPNGYKSLSTLHRL	0	0	1	0
NP/M1/M2/NS1/NEP	NS1	201	215	15	YKSLSTLHRLNAYDQ	0	0	1	0
NP/M1/M2/NS1/NEP	NS1	206	220	15	TLHRLNAYDQSGRLV	0	0	1	0
NP/M1/M2/NS1/NEP	NS1	211	225	15	NAYDQSGRLVAKLVA	0	0	1	0
NP/M1/M2/NS1/NEP	NS1	216	230	15	SGRLVAKLVATDDLT	0	0	1	0
NP/M1/M2/NS1/NEP	NS1	221	235	15	AKLVATDDLTVEDEE	0	0	1	0
NP/M1/M2/NS1/NEP	NS1	226	240	15	TDDLTVEDEEDGHRI	0	0	1	0
NP/M1/M2/NS1/NEP	NS1	231	245	15	VEDEEDGHRILNSLF	0	0	1	0
NP/M1/M2/NS1/NEP	NS1	236	250	15	DGHRILNSLFERLNE	0	0	1	0
NP/M1/M2/NS1/NEP	NS1	241	255	15	LNSLFERLNEGHSKP	0	0	1	0
NP/M1/M2/NS1/NEP	NS1	246	260	15	ERLNEGHSKPIRAAE	0	0	1	0
NP/M1/M2/NS1/NEP	NS1	251	265	15	GHSKPIRAAETAVGV	0	0	1	0
NP/M1/M2/NS1/NEP	NS1	256	270	15	IRAAETAVGVLSQFG	0	0	1	0
NP/M1/M2/NS1/NEP	NS1	261	275	15	TAVGVLSQFGQEHRL	0	0	1	0
NP/M1/M2/NS1/NEP	NS1	266	280	15	LSQFGQEHRLSPEEG	0	0	1	0
NP/M1/M2/NS1/NEP	NS1	271	282	12	QEHRLSPEEGDN	0	0	1	0
NP/M1/M2/NS1/NEP	NEP	1	15	15	MANNNMTTTQIEWRM	0	0	1	0
NP/M1/M2/NS1/NEP	NEP	6	20	15	MTTTQIEWRMKKMAI	0	0	1	0
NP/M1/M2/NS1/NEP	NEP	11	25	15	IEWRMKKMAIGSSTH	0	0	1	0
NP/M1/M2/NS1/NEP	NEP	16	30	15	KKMAIGSSTHSSSVS	0	0	1	0
NP/M1/M2/NS1/NEP	NEP	21	35	15	GSSTHSSSVSMKDIQ	0	0	1	0
NP/M1/M2/NS1/NEP	NEP	26	40	15	SSSVSMKDIQSQFEQ	0	0	1	0
NP/M1/M2/NS1/NEP	NEP	31	45	15	MKDIQSQFEQLKLRW	0	0	1	0
NP/M1/M2/NS1/NEP	NEP	36	50	15	SQFEQLKLRWESYPN	0	0	1	0
NP/M1/M2/NS1/NEP	NEP	41	55	15	LKLRWESYPNLVKST	0	0	1	0
NP/M1/M2/NS1/NEP	NEP	46	60	15	ESYPNLVKSTDYHQK	0	0	1	0
NP/M1/M2/NS1/NEP	NEP	51	65	15	LVKSTDYHQKRETIR	0	0	1	0
NP/M1/M2/NS1/NEP	NEP	56	70	15	DYHQKRETIRLVTEE	0	0	1	0
NP/M1/M2/NS1/NEP	NEP	61	75	15	RETIRLVTEELYLLS	0	0	1	0
NP/M1/M2/NS1/NEP	NEP	66	80	15	LVTEELYLLSKRIDD	0	0	1	0
NP/M1/M2/NS1/NEP	NEP	71	85	15	LYLLSKRIDDNILFH	0	0	1	0
NP/M1/M2/NS1/NEP	NEP	76	90	15	KRIDDNILFHKTVIA	0	0	1	0
NP/M1/M2/NS1/NEP	NEP	81	95	15	NILFHKTVIANSSII	0	0	1	0
NP/M1/M2/NS1/NEP	NEP	86	100	15	KTVIANSSIIADMVV	0	0	1	0
NP/M1/M2/NS1/NEP	NEP	91	105	15	NSSIIADMVVSLSLL	0	0	1	0
NP/M1/M2/NS1/NEP	NEP	96	110	15	ADMVVSLSLLETLYE	0	0	1	0
NP/M1/M2/NS1/NEP	NEP	101	115	15	SLSLLETLYEMKDVV	0	0	1	0
NP/M1/M2/NS1/NEP	NEP	106	120	15	ETLYEMKDVVEVYSR	0	0	1	0
NP/M1/M2/NS1/NEP	NEP	111	123	13	MKDVVEVYSRQCL	0	0	1	0
NP/M1/M2/NS1/NEP	NP	1	15	15	MSNMDIDGINTGTID	0	0	0	1
NP/M1/M2/NS1/NEP	NP	6	20	15	IDGINTGTIDKTPEE	0	0	0	1
NP/M1/M2/NS1/NEP	NP	56	70	15	TSSEDDVGRKTQKKQ	0	0	0	1
NP/M1/M2/NS1/NEP	NP	61	75	15	DVGRKTQKKQTPTEI	0	0	0	1
NP/M1/M2/NS1/NEP	NP	66	80	15	TQKKQTPTEIKKSVY	0	0	0	1
NP/M1/M2/NS1/NEP	NP	101	115	15	DDMERNLIQNAYAVE	0	0	0	1
NP/M1/M2/NS1/NEP	NP	106	120	15	NLIQNAYAVERILLA	0	0	0	1
NP/M1/M2/NS1/NEP	NP	111	125	15	AYAVERILLAATDDK	0	0	0	1
NP/M1/M2/NS1/NEP	NP	441	455	15	FWAPMTRSGGNEAGG	0	0	0	1
NP/M1/M2/NS1/NEP	NP	446	460	15	TRSGGNEAGGDGGSG	0	0	0	1
NP/M1/M2/NS1/NEP	NP	451	465	15	NEAGGDGGSGQISCS	0	0	0	1
NP/M1/M2/NS1/NEP	M1	91	105	15	TKKKGLILAERKMRK	0	0	0	1
NP/M1/M2/NS1/NEP	M1	96	110	15	LILAERKMRKCVSFH	0	0	0	1
NP/M1/M2/NS1/NEP	M1	101	115	15	RKMRKCVSFHEAFEI	0	0	0	1
NP/M1/M2/NS1/NEP	M1	176	190	15	EMQMVSAMNTAKAMN	0	0	0	1
NP/M1/M2/NS1/NEP	M1	181	195	15	SAMNTAKAMNGMGKG	0	0	0	1
NP/M1/M2/NS1/NEP	M1	186	200	15	AKAMNGMGKGEDVQK	0	0	0	1
NP/M1/M2/NS1/NEP	M2	1	15	15	MFEPFQILSICSFIL	0	0	0	1
NP/M1/M2/NS1/NEP	M2	6	20	15	QILSICSFILSALHF	0	0	0	1
NP/M1/M2/NS1/NEP	M2	21	35	15	MAWTIGHLNQIKRGV	0	0	0	1
NP/M1/M2/NS1/NEP	M2	26	40	15	GHLNQIKRGVNMKIR	0	0	0	1
NP/M1/M2/NS1/NEP	M2	31	45	15	IKRGVNMKIRIKGPN	0	0	0	1
NP/M1/M2/NS1/NEP	M2	36	50	15	NMKIRIKGPNKETIN	0	0	0	1
NP/M1/M2/NS1/NEP	M2	41	55	15	IKGPNKETINREVSI	0	0	0	1
NP/M1/M2/NS1/NEP	M2	46	60	15	KETINREVSILRHSY	0	0	0	1
NP/M1/M2/NS1/NEP	M2	56	70	15	LRHSYQKEIQAKEAM	0	0	0	1
NP/M1/M2/NS1/NEP	M2	61	75	15	QKEIQAKEAMKEVLS	0	0	0	1
NP/M1/M2/NS1/NEP	M2	66	80	15	AKEAMKEVLSDNMEV	0	0	0	1
NP/M1/M2/NS1/NEP	M2	71	85	15	KEVLSDNMEVLSDHI	0	0	0	1
NP/M1/M2/NS1/NEP	M2	76	90	15	DNMEVLSDHIVIEGL	0	0	0	1
NP/M1/M2/NS1/NEP	M2	81	95	15	LSDHIVIEGLSAEEI	0	0	0	1
NP/M1/M2/NS1/NEP	M2	86	100	15	VIEGLSAEEIIKMGE	0	0	0	1
NP/M1/M2/NS1/NEP	M2	96	109	14	IKMGETVLEVEESH	0	0	0	1
NP/M1/M2/NS1/NEP	NS1	1	15	15	MADNMTTTQIEVGPG	0	0	0	1
NP/M1/M2/NS1/NEP	NS1	6	20	15	TTTQIEVGPGATNAT	0	0	0	1
NP/M1/M2/NS1/NEP	NS1	11	25	15	EVGPGATNATINFEA	0	0	0	1
NP/M1/M2/NS1/NEP	NS1	16	30	15	ATNATINFEAGILEC	0	0	0	1
NP/M1/M2/NS1/NEP	NS1	21	35	15	INFEAGILECYERLS	0	0	0	1
NP/M1/M2/NS1/NEP	NS1	26	40	15	GILECYERLSWQRAL	0	0	0	1
NP/M1/M2/NS1/NEP	NS1	31	45	15	YERLSWQRALDYPGQ	0	0	0	1
NP/M1/M2/NS1/NEP	NS1	36	50	15	WQRALDYPGQDRLNR	0	0	0	1
NP/M1/M2/NS1/NEP	NS1	41	55	15	DYPGQDRLNRLKRKL	0	0	0	1
NP/M1/M2/NS1/NEP	NS1	46	60	15	DRLNRLKRKLESRIK	0	0	0	1
NP/M1/M2/NS1/NEP	NS1	51	65	15	LKRKLESRIKTHNKC	0	0	0	1
NP/M1/M2/NS1/NEP	NS1	56	70	15	ESRIKTHNKCEPESK	0	0	0	1
NP/M1/M2/NS1/NEP	NS1	61	75	15	THNKCEPESKRMSLE	0	0	0	1
NP/M1/M2/NS1/NEP	NS1	66	80	15	EPESKRMSLEERKAI	0	0	0	1
NP/M1/M2/NS1/NEP	NS1	71	85	15	RMSLEERKAIGVKMM	0	0	0	1
NP/M1/M2/NS1/NEP	NS1	76	90	15	ERKAIGVKMMKVLLF	0	0	0	1
NP/M1/M2/NS1/NEP	NS1	81	95	15	GVKMMKVLLFMNPSA	0	0	0	1
NP/M1/M2/NS1/NEP	NS1	86	100	15	KVLLFMNPSAGIEGF	0	0	0	1
NP/M1/M2/NS1/NEP	NS1	91	105	15	MNPSAGIEGFEPYCM	0	0	0	1
NP/M1/M2/NS1/NEP	NS1	96	110	15	GIEGFEPYCMKSPSE	0	0	0	1
NP/M1/M2/NS1/NEP	NS1	101	115	15	EPYCMKSPSESNCPK	0	0	0	1
NP/M1/M2/NS1/NEP	NS1	106	120	15	KSPSESNCPKYSWID	0	0	0	1
NP/M1/M2/NS1/NEP	NS1	111	125	15	SNCPKYSWIDYPSTP	0	0	0	1
NP/M1/M2/NS1/NEP	NS1	116	130	15	YSWIDYPSTPGRCLD	0	0	0	1
NP/M1/M2/NS1/NEP	NS1	121	135	15	YPSTPGRCLDDIEEE	0	0	0	1
NP/M1/M2/NS1/NEP	NS1	126	140	15	GRCLDDIEEEPDDVD	0	0	0	1
NP/M1/M2/NS1/NEP	NS1	131	145	15	DIEEEPDDVDGPTEI	0	0	0	1
NP/M1/M2/NS1/NEP	NS1	136	150	15	PDDVDGPTEIVLRDM	0	0	0	1
NP/M1/M2/NS1/NEP	NS1	141	155	15	GPTEIVLRDMNNKDA	0	0	0	1
NP/M1/M2/NS1/NEP	NS1	146	160	15	VLRDMNNKDARQKIK	0	0	0	1
NP/M1/M2/NS1/NEP	NS1	151	165	15	NNKDARQKIKEEVNT	0	0	0	1
NP/M1/M2/NS1/NEP	NS1	156	170	15	RQKIKEEVNTQKEGK	0	0	0	1
NP/M1/M2/NS1/NEP	NS1	161	175	15	EEVNTQKEGKFRLTI	0	0	0	1
NP/M1/M2/NS1/NEP	NS1	166	180	15	QKEGKFRLTIRRDMR	0	0	0	1
NP/M1/M2/NS1/NEP	NS1	171	185	15	FRLTIRRDMRNVLSL	0	0	0	1
NP/M1/M2/NS1/NEP	NS1	176	190	15	RRDMRNVLSLRVLVN	0	0	0	1
NP/M1/M2/NS1/NEP	NS1	181	195	15	NVLSLRVLVNGTFLK	0	0	0	1
NP/M1/M2/NS1/NEP	NS1	186	200	15	RVLVNGTFLKHPNGY	0	0	0	1
NP/M1/M2/NS1/NEP	NS1	191	205	15	GTFLKHPNGYKSLST	0	0	0	1
NP/M1/M2/NS1/NEP	NS1	196	210	15	HPNGYKSLSTLHRLN	0	0	0	1
NP/M1/M2/NS1/NEP	NS1	201	215	15	KSLSTLHRLNAYDQS	0	0	0	1
NP/M1/M2/NS1/NEP	NS1	206	220	15	LHRLNAYDQSGRLVA	0	0	0	1
NP/M1/M2/NS1/NEP	NS1	211	225	15	AYDQSGRLVAKLVAT	0	0	0	1
NP/M1/M2/NS1/NEP	NS1	216	230	15	GRLVAKLVATDDLTV	0	0	0	1
NP/M1/M2/NS1/NEP	NS1	221	235	15	KLVATDDLTVEDEED	0	0	0	1
NP/M1/M2/NS1/NEP	NS1	226	240	15	DDLTVEDEEDGHRIL	0	0	0	1
NP/M1/M2/NS1/NEP	NS1	231	245	15	EDEEDGHRILNSLFE	0	0	0	1
NP/M1/M2/NS1/NEP	NS1	236	250	15	GHRILNSLFERLNEG	0	0	0	1
NP/M1/M2/NS1/NEP	NS1	241	255	15	NSLFERLNEGHSKPI	0	0	0	1
NP/M1/M2/NS1/NEP	NS1	246	260	15	RLNEGHSKPIRAAET	0	0	0	1
NP/M1/M2/NS1/NEP	NS1	251	265	15	HSKPIRAAETAVGVL	0	0	0	1
NP/M1/M2/NS1/NEP	NS1	256	270	15	RAAETAVGVLSQFGQ	0	0	0	1
NP/M1/M2/NS1/NEP	NS1	261	275	15	AVGVLSQFGQEHRLS	0	0	0	1
NP/M1/M2/NS1/NEP	NS1	266	280	15	SQFGQEHRLSPEEGD	0	0	0	1
NP/M1/M2/NS1/NEP	NS1	271	281	11	EHRLSPEEGDN	0	0	0	1
NP/M1/M2/NS1/NEP	NEP	1	15	15	MADNMTTTQIEWRMK	0	0	0	1
NP/M1/M2/NS1/NEP	NEP	6	20	15	TTTQIEWRMKKMAIG	0	0	0	1
NP/M1/M2/NS1/NEP	NEP	11	25	15	EWRMKKMAIGSSIHS	0	0	0	1
NP/M1/M2/NS1/NEP	NEP	16	30	15	KMAIGSSIHSSSVLM	0	0	0	1
NP/M1/M2/NS1/NEP	NEP	21	35	15	SSIHSSSVLMKDIQS	0	0	0	1
NP/M1/M2/NS1/NEP	NEP	26	40	15	SSVLMKDIQSQFEQL	0	0	0	1
NP/M1/M2/NS1/NEP	NEP	31	45	15	KDIQSQFEQLKLRWE	0	0	0	1
NP/M1/M2/NS1/NEP	NEP	36	50	15	QFEQLKLRWESYPNL	0	0	0	1
NP/M1/M2/NS1/NEP	NEP	41	55	15	KLRWESYPNLVKSTD	0	0	0	1
NP/M1/M2/NS1/NEP	NEP	46	60	15	SYPNLVKSTDYHQKR	0	0	0	1
NP/M1/M2/NS1/NEP	NEP	51	65	15	VKSTDYHQKRETIRL	0	0	0	1
NP/M1/M2/NS1/NEP	NEP	56	70	15	YHQKRETIRLVTEEL	0	0	0	1
NP/M1/M2/NS1/NEP	NEP	61	75	15	ETIRLVTEELYLLSK	0	0	0	1
NP/M1/M2/NS1/NEP	NEP	66	80	15	VTEELYLLSKRIDDN	0	0	0	1
NP/M1/M2/NS1/NEP	NEP	71	85	15	YLLSKRIDDNILFHK	0	0	0	1
NP/M1/M2/NS1/NEP	NEP	76	90	15	RIDDNILFHKTVIAN	0	0	0	1
NP/M1/M2/NS1/NEP	NEP	81	95	15	ILFHKTVIANSSIIA	0	0	0	1
NP/M1/M2/NS1/NEP	NEP	86	100	15	TVIANSSIIADMVVS	0	0	0	1
NP/M1/M2/NS1/NEP	NEP	91	105	15	SSIIADMVVSLSLLE	0	0	0	1
NP/M1/M2/NS1/NEP	NEP	96	110	15	DMVVSLSLLETLYEM	0	0	0	1
NP/M1/M2/NS1/NEP	NEP	101	115	15	LSLLETLYEMKDVVE	0	0	0	1
NP/M1/M2/NS1/NEP	NEP	106	120	15	TLYEMKDVVEVYSRQ	0	0	0	1
NP/M1/M2/NS1/NEP	NEP	111	122	12	KDVVEVYSRQCL	0	0	0	1
